# Supplementary material for: Assembly of Inflammation-Related Genes for Pathway-Focused Genetic Analysis
Source: PLoS One. 2007 Oct 17;2(10):e1035. doi: 10.1371/journal.pone.0001035 (PMC2001184; doi:10.1371/journal.pone.0001035)
Supplement: Table S1 — List of genes included in WFINFLAM and their associated sub-pathways (0.19 MB XLS) [file pone.0001035.s001.xls]

## Sheet: GeneList_Pathway_#tSNPs_CEU_YRI
Table S1. List of genes included in WFINFLAM and their associated sub-pathways
geneID	chrom	Trasciption_Start	Trasciption_End	5kb upstream of trasciption_Start	2kb downstream of trasciption_End	PROTEIN	Primary Pathway	Secondary Pathway	# of tSNPs in gene_CEU	# of tSNPs in gene_YRI
PTPRU	chr1	29383643	29473927	29378643	29475927	Protein tyrosine phosphatase receptor type U	Adhesion-Extravasation-Migration	MAPK signaling	19	39
VCAM1	chr1	100897317	100916620	100892317	100918620	VCAM1	Adhesion-Extravasation-Migration		12	33
CD58	chr1	116769198	116825645	116767198	116830645	CD58	Adhesion-Extravasation-Migration	Leukocyte signaling	4	17
CD2	chr1	117009143	117023892	117004143	117025892	CD2	Adhesion-Extravasation-Migration	Leukocyte signaling	6	9
MUC1	chr1	151971671	151975732	151969671	151980732	CD227, mucin-1	Adhesion-Extravasation-Migration		1	3
DARC	chr1	155987582	155989361	155982582	155991361	Duffy blood group, chemokine receptor	Adhesion-Extravasation-Migration	G-Protein Coupled Receptor Signaling	5	1
CD48	chr1	157461610	157494658	157459610	157499658	CD48	Adhesion-Extravasation-Migration	Leukocyte signaling	12	23
F11R	chr1	157779056	157821807	157777056	157826807	F11R	Adhesion-Extravasation-Migration		7	9
XCL1	chr1	165277513	165282973	165272513	165284973	Lymphotactin	Adhesion-Extravasation-Migration	G-Protein Coupled Receptor Signaling	8	13
SELP	chr1	166289747	166331065	166287747	166336065	P-selectin, CD62P	Adhesion-Extravasation-Migration		29	44
SELL	chr1	166391465	166412385	166389465	166417385	L-selectin, CD62L	Adhesion-Extravasation-Migration		11	27
SELE	chr1	166423439	166434837	166421439	166439837	E-selectin	Adhesion-Extravasation-Migration		11	18
RASSF5	chr1	203069273	203150994	203064273	203152994	RAPL	Adhesion-Extravasation-Migration		17	51
CD34	chr1	204448278	204472910	204446278	204477910	CD34	Adhesion-Extravasation-Migration		14	14
MENA	chr1	223741157	223907468	223739157	223912468	ENAH	Adhesion-Extravasation-Migration		45	58
ITGB1	chr10	33229325	33264492	33227325	33269492	CD29, fibronectin receptor	Adhesion-Extravasation-Migration		17	4
CXCL12	chr10	44185612	44200551	44183612	44205551	CXCL12	Adhesion-Extravasation-Migration	G-Protein Coupled Receptor Signaling	12	14
VCL	chr10	75427877	75549918	75422877	75551918	vinculin	Adhesion-Extravasation-Migration		13	37
ADAM8	chr10	134964802	134979253	134962802	134984253	CD156a, ADAM8	Adhesion-Extravasation-Migration		6	6
ARHGAP1	chr11	46655209	46678696	46653209	46683696	Cdc42	Adhesion-Extravasation-Migration		1	2
CTNND1	chr11	57285844	57343226	57280844	57345226	catenin delta 1	Adhesion-Extravasation-Migration		5	11
SIPA1	chr11	65162170	65174965	65157170	65176965	SIPA1	Adhesion-Extravasation-Migration		3	5
CTTN	chr11	69922291	69960337	69917291	69962337	cortactin	Adhesion-Extravasation-Migration		5	10
FUT4	chr11	93916774	93922712	93911774	93924712	CD15	Adhesion-Extravasation-Migration		3	7
MMP7	chr11	101896449	101906688	101894449	101911688	MMP7	Adhesion-Extravasation-Migration		11	6
MMP10	chr11	102146443	102156554	102144443	102161554	MMP10	Adhesion-Extravasation-Migration		11	12
MMP1	chr11	102165860	102174104	102163860	102179104	MMP1	Adhesion-Extravasation-Migration		15	14
MMP12	chr11	102238674	102250922	102236674	102255922	MMP12	Adhesion-Extravasation-Migration		6	8
BLR1	chr11	118259776	118272180	118254776	118274180	B-lymphocyte chemoattractant receptor, CXCR5, CD185	Adhesion-Extravasation-Migration	G-Protein Coupled Receptor Signaling	8	12
THY1	chr11	118794097	118799064	118792097	118804064	CD7	Adhesion-Extravasation-Migration		3	11
JAM3	chr11	133444029	133526858	133439029	133528858	junctional adhesion molecule 3	Adhesion-Extravasation-Migration		18	26
CD9	chr12	6179815	6217688	6174815	6219688	CD9	Adhesion-Extravasation-Migration		8	33
ITGB7	chr12	51871375	51887267	51869375	51892267	Integrin B7, CD103b	Adhesion-Extravasation-Migration		6	10
ITGA5	chr12	53075313	53099317	53073313	53104317	Integrin 5, CD49e	Adhesion-Extravasation-Migration		1	3
MMP19	chr12	54515481	54523000	54513481	54528000	MMP19	Adhesion-Extravasation-Migration		4	4
MYL6	chr12	54838412	54841627	54833412	54843627	myosin, light polypeptide 6	Adhesion-Extravasation-Migration		1	1
SELPLG	chr12	107518538	107530035	107516538	107535035	P-selectin Ligand	Adhesion-Extravasation-Migration		3	7
PXN	chr12	119110976	119166229	119108976	119171229	Paxillin	Adhesion-Extravasation-Migration	MAPK signaling	8	15
MMP14	chr14	22375632	22386642	22370632	22388642	MMP14	Adhesion-Extravasation-Migration		10	14
SPN	chr16	29582079	29584328	29577079	29586328	CD43, leukosialin	Adhesion-Extravasation-Migration	Leukocyte signaling	2	4
ITGAL	chr16	30391571	30442006	30386571	30444006	CD11A	Adhesion-Extravasation-Migration		16	21
ITGAM	chr16	31178811	31251691	31173811	31253691	CD11B	Adhesion-Extravasation-Migration	Leukocyte signaling	11	17
ITGAX	chr16	31274009	31301819	31269009	31303819	CD11c	Adhesion-Extravasation-Migration		11	23
ITGAD	chr16	31312133	31345327	31307133	31347327	CD11c	Adhesion-Extravasation-Migration		5	11
MLCK	chr16	45298948	45339722	45296948	45344722	MLCK	Adhesion-Extravasation-Migration		3	8
MMP2	chr16	54070603	54097652	54065603	54099652	MMP2	Adhesion-Extravasation-Migration		11	27
CCL22	chr16	55950218	55957602	55945218	55959602	CCL22	Adhesion-Extravasation-Migration	G-Protein Coupled Receptor Signaling	4	7
CX3CL1	chr16	55963914	55976455	55958914	55978455	CX3CL1	Adhesion-Extravasation-Migration	G-Protein Coupled Receptor Signaling	7	9
CCL17	chr16	55996179	56007475	55991179	56009475	CCL17	Adhesion-Extravasation-Migration	G-Protein Coupled Receptor Signaling	7	8
CDH5	chr16	64958063	64996189	64953063	64998189	cadherin 5	Adhesion-Extravasation-Migration		20	23
CKLF	chr16	65143972	65157471	65138972	65159471	CKLF	Adhesion-Extravasation-Migration	G-Protein Coupled Receptor Signaling	3	5
CRK	chr17	1272198	1306294	1270198	1311294	CRK	Adhesion-Extravasation-Migration	MAPK signaling	3	8
ITGAE	chr17	3564671	3651286	3562671	3656286	Integrin alpha E, CD103	Adhesion-Extravasation-Migration		33	41
CXCL16	chr17	4583583	4589863	4581583	4594863	CXCL16	Adhesion-Extravasation-Migration	G-Protein Coupled Receptor Signaling	10	11
MYH10	chr17	8318254	8474761	8316254	8479761	myosin Iib	Adhesion-Extravasation-Migration		13	34
CCL2	chr17	29606408	29608331	29601408	29610331	CCL2	Adhesion-Extravasation-Migration	G-Protein Coupled Receptor Signaling	3	4
CCL7	chr17	29621352	29623368	29616352	29625368	CCL7	Adhesion-Extravasation-Migration	G-Protein Coupled Receptor Signaling	7	9
CCL11	chr17	29636799	29639312	29631799	29641312	CCL11	Adhesion-Extravasation-Migration	G-Protein Coupled Receptor Signaling	7	3
CCL8	chr17	29670178	29672533	29665178	29674533	CCL8	Adhesion-Extravasation-Migration	G-Protein Coupled Receptor Signaling	7	5
CCL13	chr17	29707583	29709741	29702583	29711741	CCL13	Adhesion-Extravasation-Migration	G-Protein Coupled Receptor Signaling	1	10
CCL1	chr17	29711511	29714365	29709511	29719365	CCL1	Adhesion-Extravasation-Migration	G-Protein Coupled Receptor Signaling	3	10
CCL5	chr17	31222609	31231490	31220609	31236490	CCL5	Adhesion-Extravasation-Migration	G-Protein Coupled Receptor Signaling	2	5
CCL16	chr17	31327647	31332636	31325647	31337636	CCL16	Adhesion-Extravasation-Migration	G-Protein Coupled Receptor Signaling	5	8
CCL15	chr17	31348776	31353125	31346776	31358125	CCL15	Adhesion-Extravasation-Migration	G-Protein Coupled Receptor Signaling	4	7
CCL23	chr17	31364209	31369118	31362209	31374118	CCL23	Adhesion-Extravasation-Migration	G-Protein Coupled Receptor Signaling	1	3
CCL18	chr17	31415755	31422953	31410755	31424953	CCL18	Adhesion-Extravasation-Migration	G-Protein Coupled Receptor Signaling	2	5
CCL4	chr17	31455332	31457127	31450332	31459127	CCL4	Adhesion-Extravasation-Migration	G-Protein Coupled Receptor Signaling	5	6
CCR7	chr17	35963549	35975250	35961549	35980250	CCR7	Adhesion-Extravasation-Migration	G-Protein Coupled Receptor Signaling	2	9
ITGA2B	chr17	39805075	39822399	39803075	39827399	integrin, alpha 2b	Adhesion-Extravasation-Migration	Leukocyte signaling	1	6
ITGB3	chr17	42686206	42745076	42681206	42747076	Integrin B3, CD61	Adhesion-Extravasation-Migration		23	25
ITGA3	chr17	45488729	45522843	45483729	45524843	Integrin A3, CD49c	Adhesion-Extravasation-Migration		12	25
ICAM2	chr17	59433687	59437839	59431687	59442839	ICAM2	Adhesion-Extravasation-Migration		2	5
PECAM1	chr17	59754144	59817723	59752144	59822723	PECAM1	Adhesion-Extravasation-Migration		9	37
ITGB4	chr17	71232371	71265493	71227371	71267493	Integrin B4, CD104	Adhesion-Extravasation-Migration		9	13
CD226	chr18	65681174	65775140	65679174	65780140	CD226	Adhesion-Extravasation-Migration		31	52
ICAM1	chr19	10242778	10258291	10237778	10260291	ICAM1	Adhesion-Extravasation-Migration		4	6
ICAM5	chr19	10261654	10268453	10256654	10270453	ICAM5	Adhesion-Extravasation-Migration		3	6
ICAM3	chr19	10305453	10311300	10303453	10316300	ICAM3	Adhesion-Extravasation-Migration		7	6
CD97	chr19	14353265	14380533	14348265	14382533	CD97	Adhesion-Extravasation-Migration		9	16
CEACAM5	chr19	46904369	46926276	46899369	46928276	CD66e	Adhesion-Extravasation-Migration		8	20
CEACAM6	chr19	46951340	46967953	46946340	46969953	CD66c	Adhesion-Extravasation-Migration		3	10
CEACAM3	chr19	46992395	47007429	46987395	47009429	CD66d	Adhesion-Extravasation-Migration		3	5
CEACAM1	chr19	47703298	47724438	47701298	47729438	CD55a	Adhesion-Extravasation-Migration		3	8
CEACAM8	chr19	47776234	47790890	47774234	47795890	CD66b	Adhesion-Extravasation-Migration		1	3
PLAUR	chr19	48842087	48866342	48840087	48871342	CD87	Adhesion-Extravasation-Migration		13	22
VASP	chr19	50702527	50722078	50697527	50724078	VASP	Adhesion-Extravasation-Migration		8	10
CD33	chr19	56420174	56435084	56415174	56437084	CD33, Siglec-3	Adhesion-Extravasation-Migration		4	16
ROCK2	chr2	11272375	11435309	11270375	11440309	ROCK2	Adhesion-Extravasation-Migration		12	21
ITGA6	chr2	173117876	173196509	173112876	173198509	Integrin A6, CD49f	Adhesion-Extravasation-Migration		28	72
ITGA4	chr2	182147124	182227972	182142124	182229972	CD49D, VLA-4	Adhesion-Extravasation-Migration		27	45
ITGAV	chr2	187280305	187371133	187275305	187373133	Integrin AV, CD51	Adhesion-Extravasation-Migration		18	25
ALS2	chr2	202390782	202471244	202388782	202476244	ALS2	Adhesion-Extravasation-Migration		20	26
CCL20	chr2	228504074	228507755	228499074	228509755	CCL20	Adhesion-Extravasation-Migration	G-Protein Coupled Receptor Signaling	3	9
SIGLEC1	chr20	3617206	3635775	3615206	3640775	CD169, Siglec-1	Adhesion-Extravasation-Migration		14	24
MMP9	chr20	44070953	44078606	44065953	44080606	MMP9	Adhesion-Extravasation-Migration		6	12
JAM2	chr21	25933459	26009106	25928459	26011106	junctional adhesion molecule 2	Adhesion-Extravasation-Migration		21	47
ITGB2	chr21	45130313	45165232	45128313	45170232	CD18	Adhesion-Extravasation-Migration	Leukocyte signaling	28	35
MIF	chr22	22561118	22561963	22556118	22563963	MIF	Adhesion-Extravasation-Migration		5	9
MYH9	chr22	35001826	35108481	34999826	35113481	myosin Iia	Adhesion-Extravasation-Migration		27	52
CCR4	chr3	32968069	32971407	32963069	32973407	CCR4	Adhesion-Extravasation-Migration	G-Protein Coupled Receptor Signaling	3	3
CX3CR1	chr3	39279990	39296526	39277990	39301526	CX3CR1	Adhesion-Extravasation-Migration	G-Protein Coupled Receptor Signaling	16	20
CCR8	chr3	39346218	39351077	39341218	39353077	CCR8	Adhesion-Extravasation-Migration	G-Protein Coupled Receptor Signaling	3	3
CCBP2	chr3	42825979	42883778	42820979	42885778	CCBP2	Adhesion-Extravasation-Migration	G-Protein Coupled Receptor Signaling	13	24
CXCR6	chr3	45959976	45964849	45954976	45966849	CXCR6	Adhesion-Extravasation-Migration	G-Protein Coupled Receptor Signaling	6	10
XCR1	chr3	46037441	46038443	46035441	46043443	XCR1	Adhesion-Extravasation-Migration	G-Protein Coupled Receptor Signaling	2	3
CCR1	chr3	46218203	46224836	46216203	46229836	CCR1	Adhesion-Extravasation-Migration	G-Protein Coupled Receptor Signaling	4	7
CCR3	chr3	46258691	46283166	46253691	46285166	CCR3	Adhesion-Extravasation-Migration	G-Protein Coupled Receptor Signaling	7	7
CCR2	chr3	46370643	46377423	46365643	46379423	CCR2	Adhesion-Extravasation-Migration	G-Protein Coupled Receptor Signaling	6
CCR5	chr3	46386636	46392695	46381636	46394695	CCR5	Adhesion-Extravasation-Migration	G-Protein Coupled Receptor Signaling	3
CCRL2	chr3	46423753	46426017	46418753	46428017	CCRL2	Adhesion-Extravasation-Migration	G-Protein Coupled Receptor Signaling	2
RHOA	chr3	49371584	49424530	49369584	49429530	RhoA	Adhesion-Extravasation-Migration		3	8
ALCAM	chr3	106568879	106776709	106563879	106778709	CD166, activated leukocyte cell adhesion molecule	Adhesion-Extravasation-Migration		43	57
CD47	chr3	109244630	109292625	109242630	109297625	CD47	Adhesion-Extravasation-Migration		8	17
CD96	chr3	112743545	112853906	112738545	112855906	CD96	Adhesion-Extravasation-Migration		20	31
RHOH	chr4	40021167	40068419	40016167	40070419	RhoH	Adhesion-Extravasation-Migration		23	33
CXCL1	chr4	75100143	75101988	75095143	75103988	CXCL1	Adhesion-Extravasation-Migration	G-Protein Coupled Receptor Signaling	4	5
PPBP	chr4	75217792	75218935	75215792	75223935	CXC chemokine ligand 7	Adhesion-Extravasation-Migration	G-Protein Coupled Receptor Signaling	2	6
CXCL5	chr4	75226394	75229451	75224394	75234451	CXCL5	Adhesion-Extravasation-Migration	G-Protein Coupled Receptor Signaling	1	6
CXCL3	chr4	75267348	75269525	75265348	75274525	CXCL3	Adhesion-Extravasation-Migration	G-Protein Coupled Receptor Signaling	1	2
CXCL2	chr4	75327790	75329927	75325790	75334927	CXCL2	Adhesion-Extravasation-Migration	G-Protein Coupled Receptor Signaling	1	2
CXCL9	chr4	77279801	77285820	77277801	77290820	CXCL9	Adhesion-Extravasation-Migration	G-Protein Coupled Receptor Signaling	7	8
CXCL10	chr4	77299451	77301829	77297451	77306829	CXCL10	Adhesion-Extravasation-Migration	G-Protein Coupled Receptor Signaling	5	3
CXCL11	chr4	77312020	77314412	77310020	77319412	CXCL11	Adhesion-Extravasation-Migration	G-Protein Coupled Receptor Signaling	1	2
CXCL13	chr4	78790084	78890165	78785084	78892165	CXCL13	Adhesion-Extravasation-Migration	G-Protein Coupled Receptor Signaling	14	32
FYB	chr5	39141114	39255424	39139114	39260424	FYB	Adhesion-Extravasation-Migration		22	94
CCL28	chr5	43417357	43448245	43415357	43453245	CCL28	Adhesion-Extravasation-Migration	G-Protein Coupled Receptor Signaling	4	11
ITGA1	chr5	52119892	52285241	52114892	52287241	Integrin A1, CD49a	Adhesion-Extravasation-Migration		69	114
ITGA2	chr5	52321013	52423947	52316013	52425947	Integrin A2, CD49b	Adhesion-Extravasation-Migration		37	29
CXCL14	chr5	134934273	134942868	134932273	134947868	CXCL14	Adhesion-Extravasation-Migration	G-Protein Coupled Receptor Signaling	9	11
LECT2	chr5	135310498	135318622	135308498	135323622	leukocyte cell-derived chemotaxin 2	Adhesion-Extravasation-Migration	G-Protein Coupled Receptor Signaling	6	11
HMMR	chr5	162820240	162851523	162815240	162853523	CD168, hyaluronan-mediated motility receptor	Adhesion-Extravasation-Migration		10	19
NT5E	chr6	86216527	86262215	86211527	86264215	CD73	Adhesion-Extravasation-Migration		8	13
VIL2	chr6	159157186	159209668	159155186	159214668	villin 2 (ezrin)	Adhesion-Extravasation-Migration		11	16
CCR6	chr6	167506667	167523040	167501667	167525040	CCR6	Adhesion-Extravasation-Migration	G-Protein Coupled Receptor Signaling	12	23
CCL26	chr7	75043492	75063715	75041492	75068715	CCL26	Adhesion-Extravasation-Migration	G-Protein Coupled Receptor Signaling	3	5
CCL24	chr7	75085764	75087684	75083764	75092684	CCL24	Adhesion-Extravasation-Migration	G-Protein Coupled Receptor Signaling	8	12
PTP-PEST	chr7	77004771	77107322	76999771	77109322	PTPN12	Adhesion-Extravasation-Migration	Leukocyte signaling	13	26
CD36	chr7	79912607	79950974	79907607	79952974	CD36, thrombospondin receptor	Adhesion-Extravasation-Migration	Leukocyte signaling	8	38
CCL27	chr9	34651892	34652689	34649892	34657689	CCL27	Adhesion-Extravasation-Migration	G-Protein Coupled Receptor Signaling	4	6
CCL19	chr9	34679566	34681274	34677566	34686274	CCL19	Adhesion-Extravasation-Migration	G-Protein Coupled Receptor Signaling	4	7
CCL21	chr9	34699001	34700147	34697001	34705147	CCL21	Adhesion-Extravasation-Migration	G-Protein Coupled Receptor Signaling	3	6
CD99	chrX	2602588	2652709	2597588	2654709	CD99	Adhesion-Extravasation-Migration		7
DFFB	chr1	3797001	3825149	3792001	3827149	CAD	Apoptosis Signaling		8	10
DFFA	chr1	10454870	10466879	10452870	10471879	ICAD	Apoptosis Signaling		4	5
CASP9	chr1	15564102	15596096	15562102	15601096	Caspase 9	Apoptosis Signaling		5	11
MCL1	chr1	147360106	147365209	147358106	147370209	Mcl1	Apoptosis Signaling		3	4
DAP3	chr1	152471946	152521390	152466946	152523390	DAP3	Apoptosis Signaling		2	10
LMNA	chr1	152897570	152922944	152892570	152924944	Lamin A	Apoptosis Signaling		4	10
FASLG	chr1	169359841	169367667	169354841	169369667	FasL	Apoptosis Signaling	MAPK signaling	9	4
CAPN2	chr1	220206935	220270453	220201935	220272453	Calpain 2, large subunit	Apoptosis Signaling		11	38
PARP1	chr1	222855240	222902526	222853240	222907526	PARP	Apoptosis Signaling		7	14
CDC2	chr10	62208241	62223930	62203241	62225930	Cdc2	Apoptosis Signaling		10	15
FAS	chr10	90740267	90765521	90735267	90767521	Fas	Apoptosis Signaling	MAPK signaling	14	17
CASP7	chr10	115429688	115480652	115424688	115482652	Caspase 7	Apoptosis Signaling		14	28
GAS2	chr11	22646229	22791122	22641229	22793122	Gas2	Apoptosis Signaling		20	72
BAD	chr11	63793877	63808657	63791877	63813657	BAD	Apoptosis Signaling	PI3K/AKT Signaling	4	3
CAPN1	chr11	64705918	64736052	64700918	64738052	Calpain 1, large subunit	Apoptosis Signaling		7	12
FADD	chr11	69726916	69731134	69721916	69733134	FADD	Apoptosis Signaling	MAPK signaling	2	3
BIRC3	chr11	101693403	101713674	101688403	101715674	cIAP	Apoptosis Signaling		2	12
BIRC2	chr11	101723175	101754610	101718175	101756610	cIAP	Apoptosis Signaling		5	8
CASP12	chr11	104261876	104274370	104259876	104279370	Caspase 12	Apoptosis Signaling	TNF Superfamily Signaling	3	14
BCL2L14	chr12	12115668	12255214	12110668	12257214	Bcl-GS	Apoptosis Signaling		51	86
CRADD	chr12	92573618	92746997	92568618	92748997	RAIDD	Apoptosis Signaling		52	111
APAF1	chr12	97541545	97631678	97536545	97633678	Apaf1	Apoptosis Signaling		10	14
DIABLO	chr12	121217089	121235479	121215089	121240479	Diablo	Apoptosis Signaling		4	10
ACIN1	chr14	22597615	22634663	22595615	22639663	Acinus	Apoptosis Signaling		8	18
BCL2L2	chr14	22845875	22850798	22840875	22852798	Bcl-2 like 2	Apoptosis Signaling		5	3
RIPK3	chr14	23875071	23879013	23873071	23884013	RIPK3	Apoptosis Signaling		6	8
BCL2L10	chr15	50189113	50192264	50187113	50197264	BCL2L10	Apoptosis Signaling		2	1
BCL2A1	chr15	78040289	78050698	78038289	78055698	Bfl-1	Apoptosis Signaling		7	12
TP53	chr17	7512463	7531642	7510463	7536642	p53	Apoptosis Signaling		6	11
ROCK1	chr18	16787532	16944869	16785532	16949869	ROCK1	Apoptosis Signaling		9	24
BCL2	chr18	59136114	59137025	59134114	59142025	Bcl-2	Apoptosis Signaling		2	5
CASP14	chr19	15024014	15027900	15019014	15029900	Caspase 14	Apoptosis Signaling		3	4
CAPNS1	chr19	41322757	41333094	41317757	41335094	Calpain small subunit 1	Apoptosis Signaling		1	1
BBC3	chr19	52415923	52426291	52413923	52431291	BBC3	Apoptosis Signaling		2	1
BAX	chr19	54149928	54156866	54144928	54158866	BAX	Apoptosis Signaling		5	7
BCL2L12	chr19	54860210	54868984	54855210	54870984	BCL2L12	Apoptosis Signaling		2	2
HTRA2	chr2	74668186	74672098	74663186	74674098	HtrA2	Apoptosis Signaling		2	2
BCL2L11	chr2	111597540	111640814	111592540	111642814	BCL2L11	Apoptosis Signaling		11	21
TANK	chr2	161818972	161918189	161813972	161920189	TANK	Apoptosis Signaling	NF-kB signaling	7	14
CFLAR	chr2	201806395	201854507	201801395	201856507	FLIP	Apoptosis Signaling		3	6
CASP10	chr2	201873360	201919616	201868360	201921616	Caspase 10	Apoptosis Signaling		3	14
CASP8	chr2	201950747	201977937	201945747	201979937	Caspase 8	Apoptosis Signaling		6	14
CAPN10	chr2	241246141	241258510	241241141	241260510	Calpain 10, large subunit	Apoptosis Signaling		12	7
BCL2L1	chr20	29715923	29774317	29713923	29779317	Bcl-XL	Apoptosis Signaling		4	8
BCL2L13	chr22	16496038	16586541	16491038	16588541	BCL2L13	Apoptosis Signaling		10	25
BID	chr22	16591459	16631812	16589459	16636812	Bid	Apoptosis Signaling		17	22
A4GALT	chr22	41412625	41441374	41410625	41446374	CD77	Apoptosis Signaling		16	27
BIK	chr22	41831254	41850215	41826254	41852215	BCL2-interacting killer	Apoptosis Signaling		9	13
FAIM	chr3	139810616	139834909	139805616	139836909	FAIM	Apoptosis Signaling		9	9
TNFSF10	chr3	173706166	173723971	173704166	173728971	APO-2L, TRAIL	Apoptosis signaling	TNF Superfamily Signaling	12	24
PTPN13	chr4	87873063	88093481	87868063	88095481	Fas-associated phosphatase-1	Apoptosis Signaling		23	32
CASP6	chr4	110967388	110982233	110965388	110987233	Caspase 6	Apoptosis Signaling		7	11
CASP3	chr4	185923999	185945750	185921999	185950750	Caspase 3	Apoptosis Signaling		8	14
DAP	chr5	10732405	10814339	10730405	10819339	DAP	Apoptosis Signaling		21	41
DAXX	chr6	33394380	33398682	33392380	33403682	Daxx	Apoptosis Signaling	MAPK signaling	2	2
BAK1	chr6	33648306	33655959	33646306	33660959	BAK	Apoptosis Signaling		6	10
TNFRSF21	chr6	47307227	47385639	47305227	47390639	DR6	Apoptosis Signaling	TNF Superfamily Signaling	27	52
CASP8AP2	chr6	90596378	90640875	90591378	90642875	CASP8 associated protein 2	Apoptosis Signaling	Glucocorticoid/PPAR signaling	9	9
CYCS	chr7	24931516	24938195	24929516	24943195	Cytochrome C	Apoptosis Signaling		4	3
CASP2	chr7	142502238	142521621	142497238	142523621	Caspase 2	Apoptosis Signaling		5	2
TNFRSF10B	chr8	22933595	22982637	22931595	22987637	DR5, TRAIL-R1	Apoptosis Signaling	TNF Superfamily Signaling	14	17
TNFRSF10C	chr8	23016378	23030893	23011378	23032893	DCR1, TRAIL-R3	Apoptosis Signaling	TNF Superfamily Signaling	6	11
TNFRSF10D	chr8	23049050	23077485	23047050	23082485	DCR2, TRAIL-R4	Apoptosis Signaling	TNF Superfamily Signaling	9	16
TNFRSF10A	chr8	23104915	23138584	23102915	23143584	DR4, TRAIL-R2	Apoptosis Signaling	TNF Superfamily Signaling	19	31
RIPK2	chr8	90839172	90872432	90834172	90874432	RIPK2	Apoptosis signaling	Apoptosis Signaling	7	10
DAPK1	chr9	87342309	87553102	87337309	87555102	DAPK1	Apoptosis Signaling		80	121
SPTAN1	chr9	128394439	128475426	128389439	128477426	Fodrin	Apoptosis Signaling		4	25
ENDOG	chr9	128660332	128664509	128655332	128666509	Endo G	Apoptosis Signaling		1	4
CAMK1D	chr10	12431588	12911737	12426588	12913737	CaMK I	Calcium Signaling		155	326
PPP3CB	chr10	74866617	74925760	74864617	74930760	Calcineurin	Calcium Signaling		4	7
NFATC4	chr14	23907093	23918648	23902093	23920648	NFATC4	Calcium Signaling		5	8
AKAP5	chr14	64003577	64006172	63998577	64008172	AKAP5	Calcium Signaling	G-Protein Coupled Receptor Signaling	3	1
NFATC3	chr16	66676875	66818338	66671875	66820338	NFATC3	Calcium Signaling		5	9
NFAT5	chr16	68156497	68296054	68151497	68298054	NFAT5	Calcium Signaling		12	15
NFATC1	chr18	75261313	75390310	75256313	75392310	NFATC1	Calcium Signaling		55	64
PPP3R1	chr2	68317639	68391302	68315639	68396302	Calcineurin	Calcium Signaling		5	12
NFATC2	chr20	49448630	49592665	49446630	49597665	NFATC2	Calcium Signaling		41	92
CABIN1	chr22	22732318	22899150	22727318	22901150	CABIN1	Calcium Signaling		12	20
PPP3CA	chr4	102301764	102625531	102299764	102630531	Calcineurin	Calcium Signaling		49	100
CAMK4	chr5	110587980	110848645	110582980	110850645	CaMK IV	Calcium Signaling		51	97
PPP3CC	chr8	22354540	22454580	22349540	22456580	Calcineurin	Calcium Signaling		6	26
PPP3R2	chr9	101433453	101436838	101431453	101441838	Calcineurin	Calcium Signaling		6	6
MASP2	chr1	11039121	11041551	11037121	11046551	MASP2	Complement Cascase		1	6
C1QA	chr1	22709405	22711405	22704405	22713405	C1q	Complement Cascase		3	4
C1QC	chr1	22715452	22719908	22710452	22721908	C1q	Complement Cascase		4	7
C1QB	chr1	22731192	22733433	22726192	22735433	C1q	Complement Cascase		5	7
C8A	chr1	57032499	57095915	57027499	57097915	C8A	Complement Cascase		15	36
C8B	chr1	57106905	57143709	57104905	57148709	C8B	Complement Cascase		12	12
SERPINC1	chr1	170604599	170618130	170602599	170623130	SERPINC1	Complement Cascase		4	11
CFH	chr1	193352797	193448288	193347797	193450288	HF1	Complement Cascase		17	43
C4BPB	chr1	203650978	203661730	203645978	203663730	C4BPbeta	Complement Cascase		2	9
C4BPA	chr1	203666001	203706703	203661001	203708703	C4BPalpha	Complement Cascase		12	27
CD55	chr1	203883259	203922241	203878259	203924241	DAF	Complement Cascase		2	9
CR2	chr1	204016064	204051633	204011064	204053633	CR2	Complement Cascase		17	25
CR1	chr1	204057896	204202381	204052896	204204381	CR1	Complement Cascase		15	41
CD46	chr1	204313796	204357253	204308796	204359253	MCP	Complement Cascase		9	12
MBL2	chr10	54195146	54201466	54193146	54206466	MBL	Complement Cascase		9	16
CD59	chr11	33681133	33714600	33679133	33719600	CD59	Complement Cascase		16	23
SERPING1	chr11	57121733	57138895	57116733	57140895	SERPING1	Complement Cascase		6	8
C1S	chr12	7038277	7048594	7033277	7050594	C1s	Complement Cascase		5	8
C1R	chr12	7057771	7136184	7055771	7141184	C1r	Complement Cascase		8	5
C3AR1	chr12	8102185	8110222	8100185	8115222	C3AR	Complement Cascase		2	6
SERPINA1	chr14	93914450	93926782	93912450	93931782	SERPINA1	Complement Cascase		18	21
SERPINA5	chr14	94117563	94129204	94112563	94131204	SERPINA5	Complement Cascase		16	17
SERPINF2	chr17	1595035	1605309	1590035	1607309	SERPINF2	Complement Cascase		6	4
CFD	chr19	810664	814608	805664	816608	DF	Complement Cascase		3	4
C3	chr19	6628877	6671660	6626877	6676660	C3	Complement Cascase		23	32
CPAMD8	chr19	16864757	16998469	16862757	17003469	CPAMD8	Complement Cascase		43	73
C5AR1	chr19	52504943	52517167	52499943	52519167	C5AR	Complement Cascase		1	3
SERPIND1	chr22	19452936	19466562	19447936	19468562	SERPIND1	Complement Cascase		5	5
MASP1	chr3	188434575	188492172	188432575	188497172	MASP1	Complement Cascase		34	49
CFI	chr4	111019455	111080745	111017455	111085745	IF	Complement Cascase		10	32
C9	chr5	39320764	39400412	39318764	39405412	C9	Complement Cascase		11	49
C7	chr5	40945355	41018796	40940355	41020796	C7	Complement Cascase		18	29
C6	chr5	41178092	41249369	41176092	41254369	C6	Complement Cascase		20	33
C2	chr6	32003472	32021427	31998472	32023427	C2	Complement Cascase		7	8
CFB	chr6	32021760	32027839	32016760	32029839	BF	Complement Cascase		7	8
C4B	chr6	32057812	32078435	32052812	32080435	C4B (basic)	Complement Cascase		2	1
SERPINE1	chr7	100363886	100375741	100358886	100377741	SERPINE1	Complement Cascase		11	15
C5	chr9	120794168	120892108	120792168	120897108	C5	Complement Cascase		16	27
C8G	chr9	137115549	137117256	137110549	137119256	C8G	Complement Cascase		2	3
PFC	chrX	47239879	47245958	47237879	47250958	Factor P	Complement Cascase		2	5
IL22RA1	chr1	24191566	24214917	24189566	24219917	interleukin 22 receptor, alpha 1	Cytokine signaling		16	20
TXLNA	chr1	32314437	32332978	32309437	32334978	interleukin 14, taxilin alpha	Cytokine signaling		1	3
CSF3R	chr1	36600736	36617602	36598736	36622602	G-CSF Receptor	Cytokine signaling		12	18
JAK1	chr1	65012228	65064007	65010228	65069007	JAK1	Cytokine signaling		15	22
IL23R	chr1	67344189	67437669	67339189	67439669	interleukin 23 receptor	Cytokine signaling		26	36
IL12RB2	chr1	67485067	67574604	67480067	67576604	IL12Rbeta2	Cytokine signaling		14	21
CSF1	chr1	110165498	110179866	110160498	110181866	M-CSF	Cytokine signaling		7	9
PIAS3	chr1	143065075	143075590	143060075	143077590	PIAS3	Cytokine signaling		3	6
S100A9	chr1	150143402	150146575	150138402	150148575	S100 A9	Cytokine signaling		6	7
S100A12	chr1	150159256	150161148	150157256	150166148	S100 A12	Cytokine signaling		1	1
S100A8	chr1	150175581	150176622	150173581	150181622	S100 A8	Cytokine signaling		1	5
ILF2	chr1	150447586	150456552	150445586	150461552	IL-2 binding factor 2	Cytokine signaling	Leukocyte signaling	4	5
IL6R	chr1	151190741	151253261	151185741	151255261	interleukin 6 receptor	Cytokine signaling		10	24
CRP	chr1	156495152	156497452	156493152	156502452	CRP	Cytokine signaling		3	4
IL10	chr1	203329342	203334234	203327342	203339234	interleukin 10	Cytokine signaling		10	6
IL19	chr1	203390616	203404720	203385616	203406720	interleukin 19	Cytokine signaling		6	10
IL20	chr1	203427548	203430962	203422548	203432962	interleukin 20	Cytokine signaling		4	6
IL24	chr1	203459183	203465879	203454183	203467879	interleukin 24	Cytokine signaling		1	9
IRF6	chr1	206349656	206367874	206347656	206372874	IRF6	Cytokine signaling		6	8
TGFB2	chr1	214908262	215003365	214903262	215005365	TGF-beta2	Cytokine signaling		25	75
IL15RA	chr10	6034339	6060148	6032339	6065148	IL15Ralpha	Cytokine signaling		25	33
IL2RA	chr10	6093511	6144278	6091511	6149278	interleukin 2 receptor, alpha	Cytokine signaling		33	45
GATA3	chr10	8136672	8157170	8131672	8159170	GATA-3	Cytokine signaling		11	27
BMPR1A	chr10	88506375	88674924	88501375	88676924	BMP receptor 1A	Cytokine signaling	NF-kB signaling	15	42
IRF7	chr11	602590	605921	600590	610921	IRF7	Cytokine signaling		4	4
CASP1	chr11	104401448	104411067	104399448	104416067	Caspase 1	Cytokine signaling	Innate pathogen detection	3	7
IL18	chr11	111519185	111540050	111517185	111545050	interleukin 18	Cytokine signaling	NF-kB signaling	6	13
IL10RA	chr11	117362318	117377404	117357318	117379404	interleukin 10 receptor, alpha	Cytokine signaling		8	13
STAT2	chr12	55021650	55040176	55019650	55045176	STAT2	Cytokine signaling		2	6
STAT6	chr12	55775461	55791428	55773461	55796428	STAT6	Cytokine signaling		7	11
IFNG	chr12	66834816	66839788	66832816	66844788	IFN-gamma	Cytokine signaling		4	12
IL26	chr12	66881395	66905838	66879395	66910838	interleukin 26	Cytokine signaling		11	29
IL22	chr12	66928291	66933548	66926291	66938548	interleukin 22	Cytokine signaling		8	20
SOCS2	chr12	92466065	92472446	92461065	92474446	SOCS2	Cytokine signaling		2	4
IL31	chr12	121181457	121183626	121179457	121188626	interleukin 31	Cytokine signaling		2	7
IL17D	chr13	20175481	20195236	20170481	20197236	interleukin 17D	Cytokine signaling		4	7
HMGB1	chr13	29931996	29938013	29929996	29943013	HMGB1,AMPHOTERIN	Cytokine signaling		2	3
IL25	chr14	22911857	22915452	22906857	22917452	interleukin 25	Cytokine signaling		6	14
ISGF3G	chr14	23700363	23705612	23695363	23707612	IRF9	Cytokine signaling		4	6
BMP4	chr14	53486206	53493362	53484206	53498362	bone morphogenetic protein 4	Cytokine signaling	NF-kB signaling	4	6
SOCS4	chr14	54563593	54585957	54558593	54587957	SOCS4	Cytokine signaling		5	8
TGFB3	chr14	75494194	75517242	75492194	75522242	TGF-beta3	Cytokine signaling		7	29
PIAS1	chr15	66133625	66267456	66128625	66269456	PIAS1	Cytokine signaling		9	19
IL16	chr15	79262254	79392156	79257254	79394156	interleukin 16	Cytokine signaling		25	49
IL32	chr16	3055313	3059668	3050313	3061668	interleukin 32	Cytokine signaling		5	6
SOCS1	chr16	11255774	11257540	11253774	11262540	SOCS1	Cytokine signaling		3	4
IL4R	chr16	27232751	27283599	27227751	27285599	interleukin 4 receptor	Cytokine signaling		18	47
IL21R	chr16	27321223	27369616	27316223	27371616	interleukin 21 receptor	Cytokine signaling		23	23
IRF8	chr16	84490274	84513710	84485274	84515710	IRF8	Cytokine signaling		22	52
IL17C	chr16	87232501	87234382	87227501	87236382	interleukin 17C	Cytokine signaling		2	3
CSF3	chr17	35425213	35427592	35420213	35429592	G-CSF	Cytokine signaling		3	5
STAT5B	chr17	37604721	37681950	37602721	37686950	STAT5B	Cytokine signaling		5	14
STAT5A	chr17	37693090	37717484	37688090	37719484	STAT5A	Cytokine signaling		2	9
STAT3	chr17	37718868	37794039	37716868	37799039	STAT3	Cytokine signaling		7	13
TBX21	chr17	43165608	43178484	43160608	43180484	T-bet	Cytokine signaling		6	6
ACE	chr17	58908165	58952935	58903165	58954935	angiotensin converting enzyme, CD143	Cytokine signaling		10	18
SOCS3	chr17	73864458	73867753	73862458	73872753	SOCS3	Cytokine signaling		3	2
TGIF	chr18	3441590	3448404	3436590	3450404	TGIF	Cytokine signaling		6	15
PTPN2	chr18	12783247	12874334	12781247	12879334	TC-PTP	Cytokine signaling		10	30
PIAS2	chr18	42652312	42751464	42650312	42756464	PIAS2	Cytokine signaling		6	9
SOCS6	chr18	66107242	66145328	66102242	66147328	SOCS6	Cytokine signaling		12	24
PIAS4	chr19	3958748	3989066	3953748	3991066	PIAS4	Cytokine signaling		6	8
EBI3	chr19	4180539	4188522	4175539	4190522	interleukin 27	Cytokine signaling		3	7
C19ORF10	chr19	4608558	4621415	4606558	4626415	interleukin 25, IL-27w	Cytokine signaling		5	4
TYK2	chr19	10322208	10352211	10320208	10357211	TYK2	Cytokine signaling		7	14
IL27RA	chr19	14003261	14025026	13998261	14027026	interleukin 27 receptor, alpha	Cytokine signaling		8	4
JAK3	chr19	17797960	17819800	17795960	17824800	JAK3	Cytokine signaling		12	15
IL12RB1	chr19	18031370	18058697	18029370	18063697	IL12Rbeta1	Cytokine signaling		8	13
IL28B	chr19	44426111	44427451	44424111	44432451	interleukin 28B (interferon, lambda 3)	Cytokine signaling		3	3
IL28A	chr19	44450996	44452572	44445996	44454572	interleukin 28A (interferon, lambda 2)	Cytokine signaling		1	1
IL29	chr19	44478804	44481152	44473804	44483152	interleukin 29 (interferon, lambda 1)	Cytokine signaling		2	3
TGFB1	chr19	46528490	46551656	46526490	46556656	TGF-beta1	Cytokine signaling		5	7
IRF3	chr19	54854641	54860926	54852641	54865926	IRF3	Cytokine signaling		1	2
IL11	chr19	60567568	60573626	60565568	60578626	interleukin 11	Cytokine signaling		3	4
ADAM17	chr2	9580010	9646515	9578010	9651515	CD156b, TNFa converting enzyme	Cytokine signaling		8	14
SOCS5	chr2	46837999	46901578	46832999	46903578	SOCS5	Cytokine signaling		10	17
TGFA	chr2	70586073	70692585	70584073	70697585	TGF-alpha	Cytokine signaling		40	85
IL1R2	chr2	102066823	102103400	102061823	102105400	IL-1R/TLR	Cytokine signaling	NF-kB signaling	13	37
IL1R1	chr2	102228919	102254852	102223919	102256852	interleukin 1 receptor, type I	Cytokine signaling	NF-kB signaling	17	22
IL1RL2	chr2	102261950	102314329	102256950	102316329	IL1RL2	Cytokine signaling	NF-kB signaling	19	28
IL1RL1	chr2	102386479	102427015	102381479	102429015	IL1RL1	Cytokine signaling	NF-kB signaling	13	22
IL18R1	chr2	102437614	102473736	102432614	102475736	interleukin 18 receptor 1	Cytokine signaling	NF-kB signaling	13	18
IL18RAP	chr2	102493771	102527543	102488771	102529543	IL18RAP	Cytokine signaling	NF-kB signaling	14	27
IL1A	chr2	113247723	113259202	113245723	113264202	interleukin 1, alpha	Cytokine signaling	NF-kB signaling	3	10
IL1B	chr2	113303567	113310587	113301567	113315587	interleukin 1, beta	Cytokine signaling	NF-kB signaling	3	9
IL1F7	chr2	113386778	113392687	113381778	113394687	IL1F7	Cytokine signaling	NF-kB signaling	4	7
IL1F9	chr2	113451836	113459458	113446836	113461458	interleukin 1 family, member 9	Cytokine signaling	NF-kB signaling	5	8
IL1F6	chr2	113479679	113481852	113474679	113483852	interleukin 1 family, member 6 (epsilon)	Cytokine signaling	NF-kB signaling	4	3
IL1F8	chr2	113495898	113526671	113493898	113531671	IL1F8	Cytokine signaling	NF-kB signaling	10	14
IL1F5	chr2	113532915	113538549	113527915	113540549	interleukin 1 family, member 5 (delta)	Cytokine signaling	NF-kB signaling	1	9
IL1F10	chr2	113546125	113549656	113541125	113551656	IL1F10	Cytokine signaling	NF-kB signaling	15	21
IL1RN	chr2	113601368	113607823	113596368	113609823	IL-1RA	Cytokine signaling	NF-kB signaling	10	24
NMI	chr2	151952492	151971882	151950492	151976882	NMI	Cytokine signaling		8	12
STAT1	chr2	191665769	191704442	191663769	191709442	STAT1	Cytokine signaling		15	33
STAT4	chr2	191719811	191841431	191717811	191846431	STAT4	Cytokine signaling		38	65
BMPR2	chr2	203067104	203257979	203062104	203259979	BMP receptor 2	Cytokine signaling	NF-kB signaling	10	14
IL8RB	chr2	218816251	218827481	218811251	218829481	IL8Rbeta	Cytokine signaling		2	6
IL8RA	chr2	218853075	218857222	218851075	218862222	IL8Ralpha	Cytokine signaling		4	7
BMP2	chr20	6697206	6707769	6692206	6709769	bone morphogenetic protein 2	Cytokine signaling	NF-kB signaling	4	6
TGIF2	chr20	34635436	34655764	34630436	34657764	TGFB-induced factor 2	Cytokine signaling		3	4
CEBPB	chr20	48240782	48242619	48235782	48244619	NF-IL6	Cytokine signaling		2	1
PTPN1	chr20	48560297	48634491	48555297	48636491	PTP1B	Cytokine signaling		8	23
IFNAR2	chr21	33524100	33558688	33519100	33560688	IFNAR2	Cytokine signaling		9	20
IL10RB	chr21	33560541	33591390	33555541	33593390	interleukin 10 receptor, beta	Cytokine signaling		7	24
IFNAR1	chr21	33619083	33653996	33614083	33655996	IFNAR1	Cytokine signaling		9	14
IFNGR2	chr21	33697071	33731696	33692071	33733696	IFN-gamma receptor beta	Cytokine signaling		8	8
IL17RA	chr22	15940411	15965941	15935411	15967941	interleukin 17 receptor A	Cytokine signaling		17	18
LIF	chr22	28960996	28967302	28958996	28972302	leukemia inhibitory factor	Cytokine signaling		5	5
OSM	chr22	28983374	28987394	28981374	28992394	Oncostatin M	Cytokine signaling		3	5
CSF2RB	chr22	35642721	35659318	35637721	35661318	GM-CSF receptor, beta, low-affinity	Cytokine signaling		12	22
IL2RB	chr22	35846381	35870462	35844381	35875462	interleukin 2 receptor, beta	Cytokine signaling		16	48
PDGFB	chr22	37944218	37965490	37942218	37970490	Platelet-derived growth factor B	Cytokine signaling		10	18
IL5RA	chr3	3108493	3127031	3106493	3132031	interleukin 5 receptor, alpha	Cytokine signaling		13	22
TGFBR2	chr3	30623041	30708147	30618041	30710147	Type II Receptor	Cytokine signaling		45	83
CISH	chr3	50618929	50624207	50616929	50629207	CIS	Cytokine signaling		1	4
IL17RB	chr3	53855611	53874866	53850611	53876866	interleukin 17 receptor B	Cytokine signaling		7	24
IL12A	chr3	161189330	161196507	161184330	161198507	interleukin 12A (IL-12p35)	Cytokine signaling		5	6
THPO	chr3	185572474	185578634	185570474	185583634	thrombopoietin	Cytokine signaling		9	10
IL1RAP	chr3	191714592	191852003	191709592	191854003	IL1-R-AP	Cytokine signaling	NF-kB signaling	54	118
PDGFRA	chr4	54936374	55005339	54931374	55007339	Platelet-derived growth factor receptor A	Cytokine signaling		7	14
IL8	chr4	74971309	74974466	74966309	74976466	interleukin 8	Cytokine signaling		1	2
BMPR1B	chr4	96036305	96433254	96031305	96435254	BMP receptor 1B	Cytokine signaling	NF-kB signaling	63	140
IL2	chr4	123730232	123735485	123728232	123740485	interleukin 2	Cytokine signaling		5	3
IL21	chr4	123891388	123899817	123889388	123904817	interleukin 21	Cytokine signaling		3	2
IL15	chr4	142915358	143012216	142910358	143014216	interleukin 15	Cytokine signaling		10	22
IRF2	chr4	185684063	185770852	185682063	185775852	IRF2	Cytokine signaling		70	94
IL7R	chr5	35892747	35912678	35887747	35914678	interleukin 7 receptor	Cytokine signaling		9	18
LIFR	chr5	38515661	38631253	38513661	38636253	leukemia inhibitory factor receptor	Cytokine signaling		10	35
OSMR	chr5	38881892	38970159	38876892	38972159	Oncostatin M receptor	Cytokine signaling		24	70
IL31RA	chr5	55185069	55248705	55180069	55250705	IL31Ralpha	Cytokine signaling		15	22
IL6ST	chr5	55272451	55326520	55270451	55331520	GP130	Cytokine signaling		5	15
IL3	chr5	131424245	131426795	131419245	131428795	interleukin 3	Cytokine signaling		3	4
CSF2	chr5	131437383	131439758	131432383	131441758	GM-CSF	Cytokine signaling		5	13
IRF1	chr5	131846683	131854326	131844683	131859326	IRF1	Cytokine signaling		5	5
IL5	chr5	131905034	131907113	131903034	131912113	interleukin 5	Cytokine signaling		1	5
IL13	chr5	132021763	132024700	132016763	132026700	interleukin 13	Cytokine signaling		2	10
IL4	chr5	132037271	132046267	132032271	132048267	interleukin 4	Cytokine signaling		4	13
IL9	chr5	135255833	135259415	135253833	135264415	interleukin 9	Cytokine signaling		6	11
IL17B	chr5	148734024	148739031	148732024	148744031	interleukin 17B	Cytokine signaling		3	4
CSF1R	chr5	149413050	149473128	149411050	149478128	M-CSF Receptor	Cytokine signaling		25	50
PDGFRB	chr5	149473595	149515503	149471595	149520503	Platelet-derived growth factor receptor B	Cytokine signaling		24	38
IL12B	chr5	158674368	158690059	158672368	158695059	interleukin 12B (IL-12p40)	Cytokine signaling		14	15
IRF4	chr6	336759	356193	331759	358193	IRF4	Cytokine signaling		14	22
AGER	chr6	32256723	32260001	32254723	32265001	RAGE	Cytokine signaling		6	6
VEGF	chr6	43845931	43862194	43840931	43864194	VEGF	Cytokine signaling		6	9
IL17A	chr6	52159143	52163395	52154143	52165395	interleukin 17A	Cytokine signaling		9	12
IL17F	chr6	52209442	52217257	52207442	52222257	interleukin 17F	Cytokine signaling		11	17
IFNGR1	chr6	137560314	137582200	137558314	137587200	IFN-gamma receptor alpha	Cytokine signaling		5	7
IL6	chr7	22540059	22544856	22535059	22546856	interleukin 6	Cytokine signaling		6	12
IRF5	chr7	128171944	128184037	128166944	128186037	IRF5	Cytokine signaling		5	7
IL7	chr8	79807560	79880313	79805560	79885313	interleukin 7	Cytokine signaling		13	22
JAK2	chr9	4975244	5117995	4970244	5119995	JAK2	Cytokine signaling		13	40
C9ORF26	chr9	6231678	6247982	6226678	6249982	interleukin 33	Cytokine signaling		11	17
IFNB1	chr9	21067103	21067943	21065103	21072943	IFN-beta	Cytokine signaling		6	7
IFNW1	chr9	21130630	21132144	21128630	21137144	IFN-w	Cytokine signaling		1	3
IFNA21	chr9	21155635	21156619	21153635	21161619	IFNA21	Cytokine signaling		3	5
IFNA4	chr9	21176692	21177670	21174692	21182670	IFNA4	Cytokine signaling		2	4
IFNA10	chr9	21196179	21197142	21194179	21202142	IFNA10	Cytokine signaling		1	2
IFNA5	chr9	21294685	21295255	21292685	21300255	IFN-alpha	Cytokine signaling		2	5
IFNA6	chr9	21340316	21340886	21338316	21345886	IFNA6	Cytokine signaling		2	4
IFNA2	chr9	21374253	21375396	21372253	21380396	IFNA2	Cytokine signaling		4	5
IFNA8	chr9	21399132	21400174	21394132	21402174	IFNA8	Cytokine signaling		5	8
IFNA1	chr9	21430439	21431315	21425439	21433315	IFN-alpha	Cytokine signaling		4	3
IFNK	chr9	27514311	27516494	27509311	27518494	IFN-kappa	Cytokine signaling		4	5
NFIL3	chr9	91250883	91265699	91248883	91270699	NF-IL-3	Cytokine signaling		9	6
TGFBR1	chr9	98946966	98991862	98941966	98993862	Type I Receptor	Cytokine signaling		7	11
ENG	chr9	127656849	127696538	127654849	127701538	CD105	Cytokine signaling		12	13
IL3RA	chrX	1499187	1545408	1494187	1547408	IL3Ralpha	Cytokine signaling		3
CRSP2	chrX	40263811	40351037	40261811	40356037	DRIP150	Cytokine signaling		3	15
IL2RG	chrX	70110279	70114424	70108279	70119424	interleukin 2 receptor, gamma	Cytokine signaling		1	1
IL13RA2	chrX	114061519	114075187	114059519	114080187	interleukin 13 receptor, alpha 2	Cytokine signaling		1	8
IL13RA1	chrX	117643440	117710378	117638440	117712378	IL13Ralpha1	Cytokine signaling		4	7
PLA2G2A	chr1	20047239	20052215	20045239	20057215	PLA3	Eicosanoid Signaling		6	12
PLA2G2D	chr1	20183741	20191314	20181741	20196314	phospholipase A2 G2D	Eicosanoid Signaling		12	14
PTGER3	chr1	71188848	71225512	71186848	71230512	PTGER3	Eicosanoid Signaling		6	10
PTGFR	chr1	78668748	78716495	78663748	78718495	PTGFR	Eicosanoid Signaling		8	22
MGST3	chr1	162332107	162356511	162327107	162358511	microsomal glutathione S-transferase 3	Eicosanoid Signaling		21	28
PTGS2	chr1	183372625	183381213	183370625	183386213	COX-2 / PTGS2	Eicosanoid Signaling		6	14
AKR1C3	chr10	5126567	5139878	5121567	5141878	PGFS, F-prostanoid synthase	Eicosanoid Signaling		13	19
ALOX5	chr10	45189634	45261567	45184634	45263567	ALOX5	Eicosanoid Signaling		18	45
GPR44	chr11	60374982	60380020	60372982	60385020	CRTH2	Eicosanoid Signaling		3	4
PTGES3	chr12	55343648	55368156	55341648	55373156	prostaglandin E synthase 3	Eicosanoid Signaling	Glucocorticoid signaling	5	9
LTA4H	chr12	94897078	94931833	94895078	94936833	LTA4H	Eicosanoid Signaling		12	19
ALOX5AP	chr13	30207668	30236556	30202668	30238556	ALOX5AP	Eicosanoid Signaling		26	35
CYSLTR2	chr13	48178951	48181499	48173951	48183499	CYSLTR	Eicosanoid Signaling		2	3
PTGDR	chr14	51804180	51813191	51799180	51815191	PTGDR	Eicosanoid Signaling		8	8
PTGER2	chr14	51850862	51865070	51845862	51867070	PTGER2	Eicosanoid Signaling		4	8
DPEP3	chr16	66567067	66571867	66565067	66576867	DPEP	Eicosanoid Signaling		2	3
DPEP2	chr16	66578800	66590857	66576800	66595857	DPEP	Eicosanoid Signaling		3	5
DPEP1	chr16	88214500	88232338	88209500	88234338	DPEP	Eicosanoid Signaling		8	9
ALOX15	chr17	4480964	4491709	4478964	4496709	ALOX15	Eicosanoid Signaling		7	9
ALOX12	chr17	6840127	6854776	6835127	6856776	ALOX12	Eicosanoid Signaling		5	8
ALOX15B	chr17	7883126	7893174	7878126	7895174	ALOX16	Eicosanoid Signaling		6	8
ALOX12B	chr17	7916709	7931746	7914709	7936746	ALOX13	Eicosanoid Signaling		17	23
TBXA2R	chr19	3546517	3557658	3544517	3562658	TBXA2R	Eicosanoid Signaling		3	3
PTGER1	chr19	14444278	14447174	14442278	14452174	PTGER1	Eicosanoid Signaling		6	4
PTGIR	chr19	51815565	51820194	51813565	51825194	PTGIR	Eicosanoid Signaling		1	4
FPRL1	chr19	56958453	56965589	56953453	56967589	LXA4R	Eicosanoid Signaling		8	6
FPRL2	chr19	56990222	57021146	56985222	57023146	LXA4R	Eicosanoid Signaling		23	37
PTGIS	chr20	47553819	47618114	47551819	47623114	PGIS	Eicosanoid Signaling		16	33
GGT1	chr22	23328208	23349526	23323208	23351526	GGT1	Eicosanoid Signaling		2	3
PGDS	chr4	95576884	95621205	95574884	95626205	PGDS	Eicosanoid Signaling		6	15
MGST2	chr4	140944526	140983009	140939526	140985009	microsomal glutathione S-transferase 2	Eicosanoid Signaling		26	40
PTGER4	chr5	40715788	40729592	40710788	40731592	PTGER4	Eicosanoid Signaling		4	5
LTC4S	chr5	179153591	179156118	179148591	179158118	LTC4S	Eicosanoid Signaling		2	1
TBXAS1	chr7	138982135	139173186	138977135	139175186	TXS	Eicosanoid Signaling		55	122
PTGS1	chr9	122212782	122237535	122207782	122239535	COX-1 / PTGS1	Eicosanoid Signaling		11	34
PTGES2	chr9	127962526	127970028	127960526	127975028	PGES	Eicosanoid Signaling		3	3
PTGES	chr9	129580165	129594898	129578165	129599898	PGES	Eicosanoid Signaling		6	16
PTGDS	chr9	137147792	137152030	137142792	137154030	PGDS	Eicosanoid Signaling		1	5
CYSLTR1	chrX	77334275	77389232	77332275	77394232	CYSLTR	Eicosanoid Signaling		3	5
GMEB1	chr1	28815859	28862001	28810859	28864001	glucocorticoid modulatory element binding protein 1	Glucocorticoid/PPAR signaling		5	6
FAF1	chr1	50618955	51137957	50616955	51142957	Fas associated factor 1	Glucocorticoid/PPAR signaling	Apoptosis Signaling	23	49
FKBP4	chr12	2774413	2783383	2769413	2785383	FK506 binding protein 4, 59kDa	Glucocorticoid/PPAR signaling		2	3
NR4A1	chr12	50723762	50739552	50718762	50741552	Nuclear receptor 4A1	Glucocorticoid/PPAR signaling		5	7
PPARBP	chr17	34816379	34861030	34814379	34866030	PPAR binding protein	Glucocorticoid/PPAR signaling		5	4
NCOA1	chr2	24718996	24905219	24713996	24907219	NCOA1	Glucocorticoid/PPAR signaling		15	17
NR4A2	chr2	157006458	157014708	157004458	157019708	Nuclear receptor 4A2	Glucocorticoid/PPAR signaling		3	5
SDPR	chr2	192525246	192537296	192523246	192542296	serum deprivation response (phosphatidylserine binding protein)	Glucocorticoid/PPAR signaling		7	9
HSPD1	chr2	198176815	198190146	198174815	198195146	heat shock 60kDa protein 1 (chaperonin)	Glucocorticoid/PPAR signaling		3	7
GMEB2	chr20	61689398	61721673	61687398	61726673	glucocorticoid modulatory element binding protein 2	Glucocorticoid/PPAR signaling		6	12
NRIP1	chr21	15255426	15262718	15253426	15267718	NRIP1	Glucocorticoid/PPAR signaling		9	12
PPARA	chr22	44867017	44960172	44862017	44962172	PPAR alpha	Glucocorticoid/PPAR signaling		24	61
KPNA1	chr3	123623437	123716474	123621437	123721474	karyopherin alpha 1 (importin alpha 5)	Glucocorticoid/PPAR signaling		8	12
PPARGC1A	chr4	23469913	23567969	23467913	23572969	PPARGC1A	Glucocorticoid/PPAR signaling		42	56
NR2F1	chr5	92944798	92955540	92939798	92957540	NR2F1	Glucocorticoid/PPAR signaling		1	2
NR3C1	chr5	142639324	142763087	142637324	142768087	nuclear receptor 3C, glucocorticoid receptor	Glucocorticoid/PPAR signaling		10	18
FOXO3A	chr6	108988761	109108647	108983761	109110647	forkhead box O3A	Glucocorticoid/PPAR signaling		10	27
SGK	chr6	134532081	134537695	134530081	134542695	serum/glucocorticoid regulated kinase	Glucocorticoid/PPAR signaling		5	7
CITED2	chr6	139735088	139737478	139733088	139742478	Cbp/p300-interacting transactivator	Glucocorticoid/PPAR signaling		1	3
GLCCI1	chr7	7781662	7901947	7776662	7903947	glucocorticoid induced transcript 1	Glucocorticoid/PPAR signaling		24	51
NCOA2	chr8	71186820	71478574	71184820	71483574	nuclear receptor coactivator 2	Glucocorticoid/PPAR signaling		22	36
PDE4B	chr1	65970884	66551208	65965884	66553208	phosphodiesterase 4B	G-Protein Coupled Receptor Signaling		86	218
PRKACB	chr1	84321972	84416200	84316972	84418200	PKA catalytic subunit beta	G-Protein Coupled Receptor Signaling		13	27
ADORA3	chr1	111754096	111758785	111752096	111763785	adenosine receptor A3	G-Protein Coupled Receptor Signaling		5	6
RGS1	chr1	189276513	189280816	189271513	189282816	RGS1	G-Protein Coupled Receptor Signaling		5	12
ADORA1	chr1	199791438	199868189	199786438	199870189	adenosine receptor A1	G-Protein Coupled Receptor Signaling		18	42
CREM	chr10	35455806	35508780	35450806	35510780	CREM	G-Protein Coupled Receptor Signaling	MAPK signaling	4	15
ADRA2A	chr10	112826910	112830560	112821910	112832560	alpha2-adrenergic receptor A	G-Protein Coupled Receptor Signaling		5	5
PDE3B	chr11	14621906	14848926	14616906	14850926	phosphodiesterase 3B	G-Protein Coupled Receptor Signaling		8	15
PLCB3	chr11	63775697	63791604	63770697	63793604	phospholipase B3	G-Protein Coupled Receptor Signaling		5	4
ADRBK1	chr11	66790668	66810945	66785668	66812945	GRK2, G-protein receptor kinase 2	G-Protein Coupled Receptor Signaling		2	8
PDE2A	chr11	71964833	72063060	71962833	72068060	phosphodiesterase 2A	G-Protein Coupled Receptor Signaling		23	52
PDE3A	chr12	20413485	20725646	20408485	20727646	phosphodiesterase 3A	G-Protein Coupled Receptor Signaling		80	150
ADCY6	chr12	47446247	47469087	47444247	47474087	adenylyl cyclase VI	G-Protein Coupled Receptor Signaling		6	11
PDE1B	chr12	53229670	53259290	53224670	53261290	phosphodiesterase 1B	G-Protein Coupled Receptor Signaling		11	18
ADCY4	chr14	23857410	23873704	23855410	23878704	adenylyl cyclase IV	G-Protein Coupled Receptor Signaling		10	14
PLCB2	chr15	38367401	38387330	38365401	38392330	phospholipase B2	G-Protein Coupled Receptor Signaling		7	10
CREBBP	chr16	3715056	3870122	3713056	3875122	CBP/p300	G-Protein Coupled Receptor Signaling	NF-kB signaling	13	66
ADORA2B	chr17	15788955	15819935	15783955	15821935	adenosine receptor A2B	G-Protein Coupled Receptor Signaling		7	17
PRKAR1A	chr17	64020137	64040503	64015137	64042503	PKA regulatory subunit 1 alpha	G-Protein Coupled Receptor Signaling		7	11
PDE4A	chr19	10424636	10441306	10419636	10443306	phosphodiesterase 4A	G-Protein Coupled Receptor Signaling		3	4
PRKACA	chr19	14063508	14089559	14061508	14094559	PKA catalytic subunit alpha	G-Protein Coupled Receptor Signaling		2
PDE4C	chr19	18181514	18205015	18179514	18210015	phosphodiesterase 4C	G-Protein Coupled Receptor Signaling		6	8
PDE1A	chr2	182858167	183212971	182856167	183217971	phosphodiesterase 1A	G-Protein Coupled Receptor Signaling		43	133
CREB1	chr2	208220191	208289074	208215191	208291074	CREB	G-Protein Coupled Receptor Signaling	MAPK signaling	5	12
PLCB1	chr20	8061295	8813547	8056295	8815547	phospholipase B1	G-Protein Coupled Receptor Signaling		177	372
PLCB4	chr20	9024931	9409460	9019931	9411460	phospholipase B4	G-Protein Coupled Receptor Signaling		57	150
ADORA2A	chr22	23153645	23162878	23148645	23164878	adenosine receptor A2A	G-Protein Coupled Receptor Signaling		5	9
HRH1	chr3	11269399	11279415	11264399	11281415	HRH1	G-Protein Coupled Receptor Signaling		5	7
PRKAR2A	chr3	48763096	48860274	48761096	48865274	PKA regulatory subunit 2 alpha	G-Protein Coupled Receptor Signaling		3	3
ADCY5	chr3	124486088	124650082	124484088	124655082	adenylyl cyclase V	G-Protein Coupled Receptor Signaling		28	68
GRK4	chr4	3002347	3079479	2997347	3081479	GRK4	G-Protein Coupled Receptor Signaling		12	37
ADRA2C	chr4	3804398	3807217	3799398	3809217	alpha2-adrenergic receptor C	G-Protein Coupled Receptor Signaling		2	3
ADCY2	chr5	7449344	7883194	7444344	7885194	adenylyl cyclase II	G-Protein Coupled Receptor Signaling		100	217
PDE4D	chr5	58302467	58918032	58300467	58923032	phosphodiesterase 4D	G-Protein Coupled Receptor Signaling		186	303
ADRB2	chr5	148186368	148188379	148181368	148190379	beta2-adrenergic receptor	G-Protein Coupled Receptor Signaling		4	6
HRH2	chr5	175042317	175044162	175037317	175046162	HRH2	G-Protein Coupled Receptor Signaling		2	9
SYNGAP1	chr6	33495824	33529444	33490824	33531444	Syn GAP	G-Protein Coupled Receptor Signaling		7	4
PDE1C	chr7	31602486	31884231	31600486	31889231	phosphodiesterase 1C	G-Protein Coupled Receptor Signaling		86	141
ADCY1	chr7	45387360	45535952	45382360	45537952	adenylyl cyclase I	G-Protein Coupled Receptor Signaling		25	42
PRKAR2B	chr7	106279128	106396206	106274128	106398206	PKA regulatory subunit 2 beta	G-Protein Coupled Receptor Signaling		17	28
PTK2B	chr8	27238997	27372820	27233997	27374820	PYK2	G-Protein Coupled Receptor Signaling	MAPK signaling	29	77
PRKACG	chr9	68857004	68858562	68855004	68863562	PKA catalytic subunit gamma	G-Protein Coupled Receptor Signaling		6	9
PGLYRP3	chr1	150083410	150096267	150081410	150101267	Peptidoglycan recognition protein 3	Innate pathogen detection		6	10
PGLYRP4	chr1	150115671	150134095	150113671	150139095	Peptidoglycan recognition protein 4	Innate pathogen detection		9	8
CIAS1	chr1	243907392	243938445	243902392	243940445	CIAS1	Innate pathogen detection		22	34
NALP6	chr11	268570	275304	263570	277304	NALP6	Innate pathogen detection		6	8
TOLLIP	chr11	1252176	1287415	1250176	1292415	TOLLIP	Innate pathogen detection	NF-kB signaling	6	8
CASP5	chr11	104370179	104384909	104368179	104389909	Caspase 5	Innate pathogen detection	Apoptosis Signaling	11	14
COP1	chr11	104417262	104421261	104415262	104426261	COP1	Innate pathogen detection		4	6
ICEBERG	chr11	104513879	104515016	104511879	104520016	ICEBERG	Innate pathogen detection		3	6
TIRAP	chr11	125658211	125668281	125653211	125670281	TIRAP	Innate pathogen detection	NF-kB signaling	6	7
IRAK4	chr12	42439046	42468164	42434046	42470164	IRAK4	Innate pathogen detection	NF-kB signaling	6	19
IRAK3	chr12	64869283	64928652	64864283	64930652	IRAK-M	Innate pathogen detection	NF-kB signaling	10	23
HSP90B1	chr12	102826655	102844170	102821655	102846170	Heat shock protein 90B	Innate pathogen detection		23	22
OAS1	chr12	111807471	111820427	111802471	111822427	OAS1	Innate pathogen detection		3	10
OAS2	chr12	111878993	111912247	111873993	111914247	OAS2	Innate pathogen detection		21	22
PYCARD	chr16	31120309	31121752	31118309	31126752	ASC/CARD5	Innate pathogen detection	Apoptosis signaling	1	3
CARD15	chr16	49288551	49324488	49283551	49326488	NOD2	Innate pathogen detection		11	18
NALP1	chr17	5343471	5428553	5341471	5433553	CARD7	Innate pathogen detection		25	36
SARM1	chr17	23723252	23752192	23718252	23754192	SARM1	Innate pathogen detection		6	11
TICAM1	chr19	4766991	4769451	4764991	4774451	TICAM1,TRIF	Innate pathogen detection	NF-kB signaling	4	8
SITPEC	chr19	11477745	11500952	11475745	11505952	SITPEC	Innate pathogen detection	NF-kB signaling	2	5
PGLYRP2	chr19	15440462	15451312	15438462	15456312	Peptidoglycan recognition protein 2	Innate pathogen detection		6	7
PGLYRP1	chr19	51214280	51218163	51212280	51223163	PGLYRP1	Innate pathogen detection		3	3
CARD8	chr19	53403324	53444734	53401324	53449734	CARDINAL/CARD8	Innate pathogen detection		16	32
NALP12	chr19	58988669	59019460	58986669	59024460	NALP12	Innate pathogen detection		17	14
NALP2	chr19	60169555	60204318	60164555	60206318	NALP2	Innate pathogen detection		14	12
CARD12	chr2	32303024	32344305	32301024	32349305	CARD12	Innate pathogen detection		5	12
IFIH1	chr2	162949096	163000546	162947096	163005546	MDA5	Innate pathogen detection		5	10
PRKRA	chr2	179121656	179141371	179119656	179146371	PRKRA	Innate pathogen detection		4	5
KIAA1271	chr20	3775484	3795972	3770484	3797972	CARDIF	Innate pathogen detection		8	10
LBP	chr20	36408298	36439067	36403298	36441067	LBP	Innate pathogen detection		14	29
IRAK2	chr3	10181562	10260427	10176562	10262427	IRAK2	Innate pathogen detection	NF-kB signaling	28	43
MYD88	chr3	38155156	38159514	38150156	38161514	MYD88	Innate pathogen detection	NF-kB signaling	3	4
TLR9	chr3	52230137	52235219	52228137	52240219	TLR9	Innate pathogen detection		2	4
TLR10	chr4	38596828	38607155	38594828	38612155	TLR10	Innate pathogen detection		12	17
TLR1	chr4	38620443	38628978	38618443	38633978	TLR1	Innate pathogen detection		5	13
TLR6	chr4	38650973	38653726	38648973	38658726	TLR6	Innate pathogen detection		6	5
TLR2	chr4	154966670	154984135	154961670	154986135	TLR2	Innate pathogen detection		6	8
TLR3	chr4	187365457	187381399	187360457	187383399	TLR3	Innate pathogen detection		9	16
TLR5	chr1	221350207	221383247	221348207	221388247	TLR5	Innate pathogen detection		5
CARD6	chr5	40877053	40891211	40872053	40893211	CARD6 (predicted)	Innate pathogen detection	NF-kB signaling	8	10
CD180	chr5	66513871	66528368	66511871	66533368	Ly64, CD180	Innate pathogen detection		12	22
TICAM2	chr5	114942246	114989610	114940246	114994610	TICAM2	Innate pathogen detection	NF-kB signaling	9	19
CD14	chr5	139991504	139992956	139989504	139997956	CD14	Innate pathogen detection		4	5
CARD4	chr7	30430675	30484790	30428675	30489790	NOD1	Innate pathogen detection		13	19
LY96	chr8	75066143	75103859	75061143	75105859	MD-2	Innate pathogen detection		10	16
DDX58	chr9	32445704	32516322	32443704	32521322	RIG-I	Innate pathogen detection		17	50
TLR4	chr9	117546137	117557607	117541137	117559607	TLR4	Innate pathogen detection		9	27
TLR7	chrX	12644862	12666567	12639862	12668567	TLR7	Innate pathogen detection		11	33
TLR8	chrX	12684414	12700943	12679414	12702943	TLR8	Innate pathogen detection		10	27
IRAK1	chrX	152796808	152806189	152794808	152811189	IRAK1	Innate pathogen detection	NF-kB signaling	1	4
CD52	chr1	26328626	26331152	26323626	26333152	CD52,B7-Ag	Leukocyte signaling	PI3K/AKT Signaling	3	9
PTAFR	chr1	28160005	28187333	28158005	28192333	platelet-activating factor receptor	Leukocyte signaling		1	7
LCK	chr1	32386024	32420854	32381024	32422854	LCK	Leukocyte signaling		3	5
CD53	chr1	111127814	111234716	111122814	111236716	CD53	Leukocyte signaling	Natural Killer Cell Signaling	24	48
PTPN22	chr1	114068480	114126376	114066480	114131376	PTPN22	Leukocyte signaling		9	7
IGSF3	chr1	116829072	116922356	116827072	116927356	CD101	Leukocyte signaling		10	15
IGSF2	chr1	117256475	117291081	117251475	117293081	CD101	Leukocyte signaling		17	25
VTCN1	chr1	117398251	117465591	117396251	117470591	B7-H4	Leukocyte signaling	PI3K/AKT Signaling	21	53
FCGR1C	chr1	147635918	147644999	147630918	147646999	CD64c, Fc gamma receptor 1c	Leukocyte signaling		1	1
FCER1A	chr1	156072576	156091086	156067576	156093086	IgE receptor I, high affinity	Leukocyte signaling		6	9
SLAMF9	chr1	156734356	156737083	156732356	156742083	SLAMF9	Leukocyte signaling		5	8
SLAMF6	chr1	157267892	157306115	157265892	157311115	SLAMF6	Leukocyte signaling		9	22
SLAMF1	chr1	157392961	157429942	157390961	157434942	SLAMF1	Leukocyte signaling		12	24
SLAMF7	chr1	157522149	157537673	157517149	157539673	SLAMF7	Leukocyte signaling		1	7
FCER1G	chr1	157998159	158002111	157993159	158004111	FCER1	Leukocyte signaling	Natural Killer Cell Signaling	8	7
FCGR2A	chr1	158288274	158302415	158283274	158304415	FCGR2	Leukocyte signaling		13	12
FCGR2B	chr1	158364610	158379618	158359610	158381618	IgG receptor IIB, CD32	Leukocyte signaling		25	23
SH2D1B	chr1	159096713	159113586	159094713	159118586	EAT-2	Leukocyte signaling	Leukocyte signaling	7	16
CD3Z	chr1	164131543	164219484	164129543	164224484	CD3zeta	Leukocyte signaling		46	75
PTPRC	chr1	195339881	195457987	195334881	195459987	CD45	Leukocyte signaling		17	46
PTPN7	chr1	198847799	198861408	198845799	198866408	PTPN7	Leukocyte signaling	MAPK signaling	14	17
PIGR	chr1	203490266	203508202	203488266	203513202	Poly-Ig receptor	Leukocyte signaling		5	14
TCF8	chr10	31648147	31856740	31643147	31858740	Transcription factor 8	Leukocyte signaling		11	22
BLNK	chr10	97941446	98021316	97939446	98026316	BLNK, B cell linker protein	Leukocyte signaling		37	77
PIK3AP1	chr10	98343060	98470269	98341060	98475269	PI3KAP1, BCAP	Leukocyte signaling	PI3K/AKT Signaling	42	70
CD44	chr11	35116992	35210524	35111992	35212524	CD44	Leukocyte signaling		57	80
RAG1	chr11	36546138	36557871	36541138	36559871	Rag-1	Leukocyte signaling		7	10
PTPRJ	chr11	47958688	48146246	47953688	48148246	PTPRJ	Leukocyte signaling		20	54
MS4A2	chr11	59612712	59622593	59607712	59624593	IgE receptor I, beta subunit	Leukocyte signaling		4	9
MS4A1	chr11	59979864	59993129	59974864	59995129	CD20	Leukocyte signaling		8	11
CD5	chr11	60626542	60651897	60621542	60653897	CD5	Leukocyte signaling		9	17
SCGB1A1	chr11	61943098	61947242	61938098	61949242	Unteroglobulin	Leukocyte signaling		2	4
SLC3A2	chr11	62380093	62412928	62375093	62414928	CD98	Leukocyte signaling		7	10
TCIRG1	chr11	67563058	67574941	67558058	67576941	T-cell immune regulator 1	Leukocyte signaling		2	2
CD3E	chr11	117680661	117692099	117675661	117694099	CD3epsilon	Leukocyte signaling		5	6
CBL	chr11	118582199	118684068	118577199	118686068	CBL	Leukocyte signaling		9	19
CD4	chr12	6769004	6800235	6764004	6802235	CD4	Leukocyte signaling		11	23
LRRC23	chr12	6884212	6893666	6879212	6895666	LRPB7	Leukocyte signaling	PI3K/AKT Signaling	3	10
KITLG	chr12	87389036	87476706	87387036	87481706	Kit ligand	Leukocyte signaling		10	17
FLT3	chr13	27475752	27572703	27473752	27577703	Flt3	Leukocyte signaling		22	63
EDNRB	chr13	77368543	77447665	77366543	77452665	endothelin receptor type B	Leukocyte signaling		13	26
IGHA1	chr14	105244506	106202605	105242506	106207605	Immunoglobulin heavy constant alpha 1	Leukocyte signaling		77	167
CSK	chr15	72861767	72882557	72856767	72884557	Csk	Leukocyte signaling		4	8
LAT	chr16	28903887	28909597	28898887	28911597	LAT	Leukocyte signaling	Natural Killer Cell Signaling	5	5
SLC7A5	chr16	86421130	86460601	86419130	86465601	CD98	Leukocyte signaling		10	23
SCARF1	chr17	1483902	1495791	1481902	1500791	scavenger receptor class F, member 1	Leukocyte signaling		3	6
CD68	chr17	7423707	7426150	7418707	7428150	CD68, scavenger receptor D1	Leukocyte signaling		4	4
CD79B	chr17	59359831	59363446	59357831	59368446	CD79B	Leukocyte signaling		3	7
GRB2	chr17	70825752	70913384	70823752	70918384	GRB2	Leukocyte signaling	MAPK signaling	7	12
SECTM1	chr17	77872188	77884930	77870188	77889930	secreted and transmembrane 1	Leukocyte signaling		5	2
VAV1	chr19	6723721	6808371	6718721	6810371	Vav	Leukocyte signaling	Natural Killer Cell Signaling	35	61
FCER2	chr19	7659662	7672997	7657662	7677997	IgE receptor II, CD23	Leukocyte signaling		15	19
CD22	chr19	40511951	40530102	40506951	40532102	CD22	Leukocyte signaling		17	17
CD79A	chr19	47073178	47077278	47068178	47079278	CD79A	Leukocyte signaling		2	1
CD37	chr19	54530546	54535613	54525546	54537613	CD37	Leukocyte signaling		2	2
FLT3LG	chr19	54669297	54681299	54664297	54683299	Flt3 ligand	Leukocyte signaling		4	6
SIGLEC10	chr19	56605087	56613263	56603087	56618263	SIGLEC10	Leukocyte signaling		5	8
SIGLEC5	chr19	56806998	56825530	56804998	56830530	Siglec-5, CD170	Leukocyte signaling		12	10
LILRB3	chr19	59412548	59438461	59410548	59443461	CD85a, ILT5	Leukocyte signaling		15	7
LILRA6	chr19	59432280	59438536	59430280	59443536	CD85b, ILT8	Leukocyte signaling		5	4
LILRB2	chr19	59470131	59476762	59468131	59481762	CD85d, ILT4	Leukocyte signaling		4	6
LILRA3	chr19	59491668	59496050	59489668	59501050	CD85c, ILT6	Leukocyte signaling		2	2
LILRA5	chr19	59510165	59516180	59508165	59521180	CD85f, ILT11	Leukocyte signaling		4	6
LILRA4	chr19	59536504	59542233	59534504	59547233	CD85g, ILT7	Leukocyte signaling		15	18
LILRA2	chr19	59777070	59790833	59772070	59792833	CD85h, ILT1	Leukocyte signaling		3	9
LILRA1	chr19	59796924	59804352	59791924	59806352	CD85i, LIR-6	Leukocyte signaling		7	10
LILRB4	chr19	59866263	59873621	59861263	59875621	CD85k, ILT3	Leukocyte signaling		20	15
LILRP2	chr19	59911512	59916654	59906512	59918654	CD85m, ILT10	Leukocyte signaling		15	19
FCAR	chr19	60077360	60093651	60072360	60095651	IgA receptor	Leukocyte signaling		7	13
TACR1	chr2	75187884	75337928	75185884	75342928	Tachykinin receptor 1	Leukocyte signaling		48	94
CD8A	chr2	86923391	86929725	86921391	86934725	CD8A	Leukocyte signaling		3	4
CD8B1	chr2	86954120	87000696	86949120	87002696	CD8B1	Leukocyte signaling		9	9
MAL	chr2	95113352	95141609	95108352	95143609	MAL	Leukocyte signaling		5	7
ZAP70	chr2	97809386	97814841	97804386	97816841	Zap70	Leukocyte signaling		3	3
MARCO	chr2	119415974	119468467	119410974	119470467	MARCO	Leukocyte signaling		18	24
DPP4	chr2	162674263	162756559	162672263	162761559	CD26	Leukocyte signaling		12	28
CD28	chr2	204396703	204428062	204391703	204430062	CD28	Leukocyte signaling	PI3K/AKT Signaling	9	18
CTLA4	chr2	204558014	204564189	204553014	204566189	CTLA-4,CD152	Leukocyte signaling	PI3K/AKT Signaling	7	13
ICOS	chr2	204627008	204651802	204622008	204653802	ICOS	Leukocyte signaling	PI3K/AKT Signaling	11	22
SIRPB1	chr20	1491567	1548630	1489567	1553630	CD172b	Leukocyte signaling		14	19
SIRPG	chr20	1557797	1586402	1555797	1591402	CD172g	Leukocyte signaling		20	28
PTPNS1	chr20	1823425	1868540	1818425	1870540	PTPNS1	Leukocyte signaling		26	34
CST7	chr20	24877865	24888562	24872865	24890562	cystatin F	Leukocyte signaling		7	11
SLA2	chr20	34674339	34707972	34672339	34712972	Src-like adapter protein-2	Leukocyte signaling		6	7
CD40	chr20	44180312	44191337	44175312	44193337	CD40	Leukocyte signaling	NF-kB signaling	9	8
ICOSLG	chr21	44471151	44485262	44469151	44490262	ICOS-L	Leukocyte signaling	PI3K/AKT Signaling	5	16
SCARF2	chr22	19103428	19116700	19101428	19121700	scavenger receptor class F, member 2	Leukocyte signaling		9	9
VPREB1	chr22	20923753	20924480	20918753	20926480	vPreB	Leukocyte signaling		6	9
IGLL1	chr22	22239865	22247049	22237865	22252049	lambda5	Leukocyte signaling		8	10
GRAP2	chr22	38621585	38691884	38616585	38693884	GADS, GRB2L	Leukocyte signaling		21	26
MST1R	chr3	49899441	49916074	49897441	49921074	macrophage stimulating 1 receptor, CDw136	Leukocyte signaling		4	6
CD80	chr3	120725831	120761139	120723831	120766139	B7-1,CD80	Leukocyte signaling	PI3K/AKT Signaling	29	23
CD86	chr3	123256910	123322672	123251910	123324672	B7-2,CD86	Leukocyte signaling	PI3K/AKT Signaling	22	25
SH3BP2	chr4	2857545	2877920	2852545	2879920	3BP2	Leukocyte signaling	Natural Killer Cell Signaling	7	9
CD38	chr4	15456199	15526975	15451199	15528975	CD38	Leukocyte signaling		12	30
TXK	chr4	47909688	47977201	47907688	47982201	TXK tyrosine kinase	Leukocyte signaling		12	25
TEC	chr4	47978728	48112742	47976728	48117742	Tec	Leukocyte signaling		38	71
DAPP1	chr4	101095167	101148489	101090167	101150489	DAPP1	Leukocyte signaling		12	27
EDNRA	chr4	148759734	148823710	148754734	148825710	endothelin receptor type A	Leukocyte signaling		15	41
TCF7	chr5	133478300	133511818	133473300	133513818	Transcription factor 7	Leukocyte signaling		5	19
ITK	chr5	156540484	156614687	156535484	156616687	IL2-inducible T-cell kinase	Leukocyte signaling		37	44
LCP2	chr5	169607666	169657400	169605666	169662400	SLP-76	Leukocyte signaling		21	36
SCGB3A1	chr5	179949711	179951093	179947711	179956093	secretoglobin 3A1	Leukocyte signaling		3	2
TREM2	chr6	41234230	41238892	41232230	41243892	TREM2	Leukocyte signaling		3	5
TREM1	chr6	41351689	41362435	41349689	41367435	TREM1	Leukocyte signaling		8	12
TFEB	chr6	41759694	41810776	41757694	41815776	TFEB	Leukocyte signaling		23	27
FYN	chr6	112089179	112301320	112087179	112306320	Fyn	Leukocyte signaling	MAPK signaling	44	90
TRGV9	chr7	38072491	38130829	38070491	38135829	TCR gamma variable 9	Leukocyte signaling		36	42
PILRB	chr7	99578387	99610103	99573387	99612103	Paired immunoglobulin-like receptor B	Leukocyte signaling		3	3
PBEF1	chr7	105484606	105519308	105482606	105524308	Pre-B cell enhancing factor	Leukocyte signaling		6	10
MSR1	chr8	16009760	16094595	16007760	16099595	macrophage scavenger receptor 1	Leukocyte signaling		18	54
PAG1	chr8	82042602	82186858	82040602	82191858	PAG	Leukocyte signaling		47	113
PDCD1LG2	chr9	5500569	5560398	5495569	5562398	B7-DC	Leukocyte signaling	PI3K/AKT Signaling	22	27
PAX5	chr9	36828530	37024476	36826530	37029476	PAX5	Leukocyte signaling		78	164
SHB	chr9	37905895	38059210	37903895	38064210	SHB	Leukocyte signaling		20	60
SEMA4D	chr9	89221705	89324165	89219705	89329165	CD100	Leukocyte signaling		20	38
SYK	chr9	90643624	90738036	90638624	90740036	Syk	Leukocyte signaling	Natural Killer Cell Signaling	62	85
ABL1	chr9	130618821	130792614	130613821	130794614	ABL1	Leukocyte signaling		22	70
FOXP3	chrX	48863780	48877659	48861780	48882659	FOXP3	Leukocyte signaling		3	5
BTK	chrX	100410586	100447327	100408586	100452327	Bruton tyrosine kinase	Leukocyte signaling		9	16
CD40LG	chrX	135455855	135468068	135450855	135470068	CD40L	Leukocyte signaling	NF-kB signaling	3	10
PRKCZ	chr1	2014070	2148996	2009070	2150996	PKCaeta	MAPK signaling	NF-kB signaling	11	26
RAP1GAP	chr1	21668020	21741105	21666020	21746105	Rap1GAP	MAPK signaling	G-Protein Coupled Receptor Signaling	47	45
RPS6KA1	chr1	26556484	26585662	26551484	26587662	p90RSK	MAPK signaling		10	16
MAP3K6	chr1	27365811	27377479	27363811	27382479	ASK2, MAP3K6	MAPK signaling		6	10
HDAC1	chr1	32426800	32468317	32421800	32470317	HDAC1/2	MAPK signaling	NF-kB signaling	1	6
MKNK1	chr1	46735110	46781906	46733110	46786906	MNK1	MAPK signaling		8	23
JUN	chr1	58958483	58961806	58956483	58966806	c-Jun	MAPK signaling		3	3
RAP1A	chr1	111874446	111968142	111869446	111970142	Rap1a	MAPK signaling	G-Protein Coupled Receptor Signaling	13	16
NRAS	chr1	114961626	114971557	114959626	114976557	Ras	MAPK signaling	NF-kB signaling	6	5
SHC1	chr1	151747847	151759913	151745847	151764913	SHC	MAPK signaling		1	5
MEF2D	chr1	153246591	153283602	153244591	153288602	MEF2D	MAPK signaling		5	9
IFI16	chr1	155792779	155838011	155787779	155840011	IFN-gamma inducible protein 16	MAPK signaling		9	28
PLA2G4A	chr1	183529761	183689770	183524761	183691770	cPLA2	MAPK signaling	NF-kB signaling	35	52
MAPKAPK2	chr1	203246683	203296021	203241683	203298021	MAPKAPK2	MAPK signaling		11	16
ATF3	chr1	209170507	209182494	209165507	209184494	ATF3	MAPK signaling		10	15
DUSP10	chr1	218263160	218303856	218261160	218308856	MKP5	MAPK signaling		21	32
PRKCQ	chr10	6509110	6662244	6507110	6667244	PKCtheta	MAPK signaling	NF-kB signaling	56	90
MAPK8	chr10	49279692	49313189	49274692	49315189	JNK1	MAPK signaling		8	11
HRAS	chr11	522242	525550	520242	530550	Ras	MAPK signaling	NF-kB signaling	2	2
INS	chr11	2137584	2139000	2135584	2144000	Insulin	MAPK signaling	NF-kB signaling	2	2
MADD	chr11	47247534	47308158	47242534	47310158	MADD	MAPK signaling		9	13
RPS6KA4	chr11	63883200	63896262	63878200	63898262	MSK1	MAPK signaling		2	5
FOSL1	chr11	65416267	65424573	65414267	65429573	FOSL1	MAPK signaling		2	4
PPP1CA	chr11	66922227	66925952	66920227	66930952	PP1	MAPK signaling		2	4
PAK1	chr11	76710708	76862581	76708708	76867581	PAK	MAPK signaling		8	32
PPP2R1B	chr11	111102841	111142379	111100841	111147379	protein phosphatase 2 R1 beta	MAPK signaling		5	6
HSPB2	chr11	111288708	111290027	111283708	111292027	HSP27	MAPK signaling	Apoptosis Signaling	3	4
ETS1	chr11	127833871	127897371	127831871	127902371	Ets	MAPK signaling		35	43
KRAS	chr12	25249446	25295121	25247446	25300121	Ras	MAPK signaling	NF-kB signaling	17	26
RAPGEF3	chr12	46417293	46438822	46415293	46443822	EPAC	MAPK signaling	G-Protein Coupled Receptor Signaling	22	25
ATF1	chr12	49444127	49500327	49439127	49502327	ATF-1	MAPK signaling		5	14
DDIT3	chr12	56196639	56200567	56194639	56205567	CHOP	MAPK signaling		2	3
DUSP6	chr12	88244306	88248764	88242306	88253764	MKP1/2/3/4	MAPK signaling		2	8
PPP1CC	chr12	109620463	109643387	109618463	109648387	PP1	MAPK signaling		4	8
MAPKAPK5	chr12	110742998	110793947	110737998	110795947	PRAK	MAPK signaling		4	8
SOS2	chr14	49654812	49767751	49652812	49772751	SOS	MAPK signaling		9	19
PPM1A	chr14	59785817	59829823	59780817	59831823	protein phosphatase 1A, Mg2+	MAPK signaling		5	11
MAX	chr14	64620215	64638980	64618215	64643980	Max	MAPK signaling		2	8
FOS	chr14	74815283	74818666	74810283	74820666	c-Fos	MAPK signaling	Innate pathogen detection	4	3
RPS6KA5	chr14	90406925	90596746	90404925	90601746	MSK2	MAPK signaling		23	54
RASGRP1	chr15	36567597	36644224	36565597	36649224	Ras GRP	MAPK signaling	G-Protein Coupled Receptor Signaling	16	24
TLN2	chr15	60726801	60920733	60721801	60922733	Talin	MAPK signaling		55	161
MAP2K1	chr15	64466678	64570935	64461678	64572935	MEK1/2	MAPK signaling		7	19
MEF2A	chr15	97956184	98071524	97951184	98073524	MEF2A	MAPK signaling		11	31
EEF2K	chr16	22125092	22207566	22120092	22209566	eEF2K	MAPK signaling		11	30
PRKCB1	chr16	23754822	24139063	23749822	24141063	PKCbeta	MAPK signaling	NF-kB signaling	99	193
MAPK3	chr16	30032927	30042039	30030927	30047039	ERK2	MAPK signaling		2	3
BCAR1	chr16	73820429	73843004	73818429	73848004	CAS	MAPK signaling		8	12
MAP2K4	chr17	11864859	11987775	11859859	11989775	MKK4	MAPK signaling	Innate pathogen detection	16	26
MAP2K3	chr17	21128580	21158870	21123580	21160870	MKK3	MAPK signaling	Innate pathogen detection	8	13
KSR1	chr17	22823162	22974844	22818162	22976844	KSR	MAPK signaling		25	46
PRKCA	chr17	61729387	62237324	61724387	62239324	PKCalpha	MAPK signaling		134	204
MAP2K6	chr17	64922433	65051067	64917433	65053067	MKK6	MAPK signaling	NF-kB signaling	40	84
MAP2K2	chr19	4041321	4075126	4039321	4080126	MEK1/2	MAPK signaling		15	14
JUND	chr19	18251569	18253468	18249569	18258468	Jun-D	MAPK signaling		4	2
MEF2B	chr19	19117377	19163933	19115377	19168933	MEF2B	MAPK signaling		8	13
MAP4K1	chr19	43770120	43800404	43768120	43805404	HPK1, hematopoietic progenitor kinase 1	MAPK signaling		2	8
PPP2R1A	chr19	57385045	57421482	57380045	57423482	PP2	MAPK signaling		20	30
YWHAQ	chr2	9674703	9721704	9672703	9726704	14-3-3eta	MAPK signaling		8	23
MYCN	chr2	16031280	16037726	16026280	16039726	N-Myc	MAPK signaling		5	4
PPP1CB	chr2	28886276	28937456	28881276	28939456	PP1	MAPK signaling		9	6
SOS1	chr2	39124615	39259214	39122615	39264214	SOS	MAPK signaling		7	27
PRKCE	chr2	45790693	46326779	45785693	46328779	PKCepsilon	MAPK signaling		214	308
DUSP2	chr2	96230790	96233053	96228790	96238053	PAC1	MAPK signaling		2	2
ATF2	chr2	175764514	175858404	175762514	175863404	ATF-2	MAPK signaling		9	16
PPP1R7	chr2	241809891	241842429	241804891	241844429	PP1/PP2A	MAPK signaling		7	16
SRC	chr20	35406501	35467233	35401501	35469233	Src	MAPK signaling	G-Protein Coupled Receptor Signaling	17	31
PLCG1	chr20	39199574	39237771	39194574	39239771	PLC&gamma;	MAPK signaling		8	12
YWHAB	chr20	42947757	42970574	42942757	42972574	14-3-3beta	MAPK signaling		4	6
ETS2	chr21	39099718	39118749	39094718	39120749	Ets	MAPK signaling		6	11
HMGN1	chr21	39636111	39642917	39634111	39647917	HMG-14	MAPK signaling		5	4
MAPK1	chr22	20447885	20546524	20445885	20551524	ERK1	MAPK signaling		7	16
YWHAH	chr22	30665032	30678143	30660032	30680143	14-3-3theta	MAPK signaling		5	6
RAC2	chr22	35945811	35964805	35943811	35969805	Rac	MAPK signaling		14	26
MAP3K7IP1	chr22	38120258	38157632	38115258	38159632	TAB1	MAPK signaling	NF-kB signaling	6	11
ATF4	chr22	38241068	38243191	38236068	38245191	ATF4	MAPK signaling		1	3
EP300	chr22	39813106	39900578	39808106	39902578	CBP/p300	MAPK signaling	NF-kB signaling	6	10
MAPK12	chr22	48993787	49002546	48991787	49007546	p38 MAPK gamma	MAPK signaling		2	5
MAPK11	chr22	49004599	49011236	49002599	49016236	p38 MAPK beta	MAPK signaling		3	1
PPARG	chr3	12367958	12450840	12362958	12452840	PPAR&gamma;	MAPK signaling		17	32
RAF1	chr3	12600107	12680678	12598107	12685678	c-Raf	MAPK signaling		10	17
KCNH8	chr3	19165020	19552139	19160020	19554139	Elk-3	MAPK signaling		43	89
MAPKAPK3	chr3	50629604	50661723	50624604	50663723	MAPKAPK3	MAPK signaling		3	9
PRKCD	chr3	53170262	53201771	53165262	53203771	PKCdelta	MAPK signaling		12	22
PPP2R3A	chr3	137224279	137349431	137219279	137351431	PP1/PP2A	MAPK signaling		15	23
EGF	chr4	111191653	111291023	111186653	111293023	Epidermal growth factor receptor	MAPK signaling	PI3K/AKT Signaling	15	65
MAP3K1	chr5	56147216	56225472	56142216	56227472	MEKK1	MAPK signaling	Innate pathogen detection	10	12
RASA1	chr5	86600521	86723488	86595521	86725488	Ras GAP	MAPK signaling	G-Protein Coupled Receptor Signaling	6	9
MEF2C	chr5	88051921	88214780	88049921	88219780	MEF2C	MAPK signaling		28	29
HINT1	chr5	130522882	130528935	130520882	130533935	HINT1	MAPK signaling		2	4
PPP2CA	chr5	133560046	133589849	133558046	133594849	PP2	MAPK signaling		2	5
PPP2R2B	chr5	145949259	146238352	145947259	146243352	protein phosphatase 2 R2 beta	MAPK signaling		67	149
DUSP1	chr5	172127706	172130809	172125706	172135809	MKP1	MAPK signaling		3	5
MAPK9	chr5	179595389	179640216	179593389	179645216	MAPK9	MAPK signaling		24	26
MAPK14	chr6	36103550	36186513	36098550	36188513	p38 MAPK alpha	MAPK signaling		12	17
MAPK13	chr6	36206239	36215820	36201239	36217820	p38 MAPK delta	MAPK signaling		7	6
MAP3K7	chr6	91282073	91353628	91280073	91358628	TAK1	MAPK signaling	NF-kB signaling	7	21
HDAC2	chr6	114368619	114398967	114366619	114403967	HDAC1/2	MAPK signaling	NF-kB signaling	12	11
PTPRK	chr6	128331624	128883416	128329624	128888416	Protein tyrosine phosphatase receptor type K	MAPK signaling		56	172
MAP3K5	chr6	136919880	137155349	136917880	137160349	ASK1	MAPK signaling	Apoptosis Signaling	26	94
MAP3K7IP2	chr6	149680755	149774440	149675755	149776440	TAB2	MAPK signaling	Innate pathogen detection	8	16
ESR1	chr6	152220799	152516520	152215799	152518520	ER	MAPK signaling		65	131
RAC1	chr7	6187365	6216837	6182365	6218837	Rac	MAPK signaling		7	24
EGFR	chr7	54860933	54998851	54855933	55000851	EGF receptor	MAPK signaling	PI3K/AKT Signaling	88	78
HSPB1	chr7	75576573	75578263	75571573	75580263	HSP27	MAPK signaling	Apoptosis Signaling	2	7
YWHAG	chr7	75600767	75632967	75598767	75637967	14-3-3gamma	MAPK signaling		6	15
BRAF	chr7	139887462	140077748	139885462	140082748	B-Raf	MAPK signaling	G-Protein Coupled Receptor Signaling	10	12
DUSP4	chr8	29249538	29264104	29247538	29269104	MKP2	MAPK signaling		8	12
PPP2CB	chr8	30762668	30789894	30760668	30794894	PP2	MAPK signaling		5	7
LYN	chr8	56954925	57085685	56949925	57087685	Lyn	MAPK signaling		40	77
YWHAZ	chr8	102000089	102033447	101998089	102038447	14-3-3zetea	MAPK signaling		8	8
MYC	chr8	128817685	128822853	128812685	128824853	c-Myc	MAPK signaling		5	9
PTK2	chr8	141737682	142080514	141735682	142085514	FAK	MAPK signaling		14	53
TLN1	chr9	35687333	35722128	35685333	35727128	Talin	MAPK signaling		6	11
RAPGEF1	chr9	131481710	131642479	131479710	131647479	C3G	MAPK signaling	G-Protein Coupled Receptor Signaling	32	64
ARAF	chrX	47176760	47187553	47171760	47189553	A-Raf	MAPK signaling		4	7
ELK1	chrX	47251173	47266274	47249173	47271274	Elk-1	MAPK signaling	MAPK signaling	2	4
DUSP9	chrX	152428834	152437623	152423834	152439623	MKP1/2/3/4	MAPK signaling		6	4
CD160	chr1	143184841	143204609	143182841	143209609	CD160	Natural Killer Cell Signaling		2	6
CD244	chr1	157613023	157645718	157611023	157650718	2B4	Natural Killer Cell Signaling		9	28
FCGR3A	chr1	158324607	158332873	158322607	158337873	FCGR3	Natural Killer Cell Signaling		11	22
NCAM1	chr11	112337204	112654367	112332204	112656367	CD56	Natural Killer Cell Signaling		65	125
B3GAT1	chr11	133753611	133787022	133751611	133792022	CD57	Natural Killer Cell Signaling		13	12
PTPN6	chr12	6930762	6940740	6925762	6942740	SHP1	Natural Killer Cell Signaling	Leukocyte signaling	2	2
KLRB1	chr12	9639137	9651764	9637137	9656764	CD161	Natural Killer Cell Signaling		9	15
KLRD1	chr12	10351683	10359227	10346683	10361227	CD94	Natural Killer Cell Signaling		3	10
KLRK1	chr12	10416219	10451632	10414219	10456632	NKG2D	Natural Killer Cell Signaling		9	14
KLRC4	chr12	10451249	10453623	10449249	10458623	NKG2F	Natural Killer Cell Signaling		2	6
KLRC2	chr12	10474474	10479897	10472474	10484897	NKG2C	Natural Killer Cell Signaling		1
KLRC1	chr12	10489900	10497196	10487900	10502196	NKG2A	Natural Killer Cell Signaling		7	7
PTPN11	chr12	111319255	111410436	111314255	111412436	SHP2	Natural Killer Cell Signaling	Leukocyte signaling	6	9
CD300A	chr17	69974116	69992526	69969116	69994526	IRp60	Natural Killer Cell Signaling		11	22
TYROBP	chr19	41087143	41091026	41085143	41096026	DAP12	Natural Killer Cell Signaling	Leukocyte signaling	1	2
SIGLEC7	chr19	56337385	56348595	56332385	56350595	AIRM1	Natural Killer Cell Signaling	Leukocyte signaling	5	10
LAIR1	chr19	59557945	59568280	59555945	59573280	LAIR1	Natural Killer Cell Signaling	Leukocyte signaling	7	8
LILRB1	chr19	59820440	59840814	59815440	59842814	CD85j, ILT2	Natural Killer Cell Signaling		4	7
KIR3DL3	chr19	59927795	59939815	59922795	59941815	KIR3DL3	Natural Killer Cell Signaling		1	4
KIR2DS4	chr19	60035985	60051836	60030985	60053836	KIR2DS4	Natural Killer Cell Signaling		1	8
KIR3DL2	chr19	60053740	60070482	60048740	60072482	KIR3DL2	Natural Killer Cell Signaling		4	8
NCR1	chr19	60109319	60119197	60104319	60121197	NKP46	Natural Killer Cell Signaling		7	16
HLA-G	chr6	29903496	29906859	29898496	29908859	HLA-G	Natural Killer Cell Signaling		4	4
HLA-E	chr6	30565249	30569064	30560249	30571064	HLA-E	Natural Killer Cell Signaling		3	3
MICA	chr6	31479349	31491069	31474349	31493069	MIC-A	Natural Killer Cell Signaling		19	12
MICB	chr6	31573944	31586879	31568944	31588879	MIC-B	Natural Killer Cell Signaling		18	12
NCR3	chr6	31664651	31668741	31662651	31673741	NKP30	Natural Killer Cell Signaling		4	8
NCR2	chr6	41411504	41426593	41406504	41428593	NKP44	Natural Killer Cell Signaling		15	27
RAET1E	chr6	150301714	150304211	150299714	150309211	ULBP4	Natural Killer Cell Signaling		4	6
ULBP3	chr6	150477856	150482316	150475856	150487316	ULBP3	Natural Killer Cell Signaling		7	11
SH2D1A	chrX	123205728	123232540	123200728	123234540	SAP	Natural Killer Cell Signaling	Leukocyte signaling	5	8
BCL10	chr1	85443479	85455604	85441479	85460604	BCL10	NF-kB signaling	Innate pathogen detection	9	10
CHUK	chr10	101938114	101979334	101936114	101984334	IKKalpha	NF-kB signaling		4	9
BTRC	chr10	103103814	103307058	103098814	103309058	beta-TrCP	NF-kB signaling		11	12
NFKB2	chr10	104145421	104152270	104140421	104154270	NF-kB 2	NF-kB signaling		3	3
RELA	chr11	65178392	65186951	65176392	65191951	NF-kB p65	NF-kB signaling		1	3
NFRKB	chr11	129239574	129268114	129237574	129273114	NFRKB	NF-kB signaling		7	13
TBK1	chr12	63132203	63182158	63127203	63184158	NAK	NF-kB signaling	Apoptosis Signaling	5	9
UBE2N	chr12	92304555	92338494	92302555	92343494	UBE2N	NF-kB signaling		5	8
NFKBIA	chr14	34940467	34943695	34938467	34948695	IkappaB alpha	NF-kB signaling		1	1
MEFV	chr16	3232028	3246628	3230028	3251628	MEFV	NF-kB signaling		6	9
CSNK2A2	chr16	56749314	56789283	56747314	56794283	CK2	NF-kB signaling		8	7
MAP3K14	chr17	40696270	40750197	40694270	40755197	NIK	NF-kB signaling	MAPK signaling	10	24
MAP3K3	chr17	59053532	59127401	59048532	59129401	MEKK3	NF-kB signaling	MAPK signaling	3	13
CARD14	chr17	75766875	75797446	75761875	75799446	CARMA2/BIMP2	NF-kB signaling		23	27
MALT1	chr18	54489597	54568350	54484597	54570350	MALT1	NF-kB signaling		13	14
MAP2K7	chr19	7874764	7885362	7869764	7887362	MKK7	NF-kB signaling	MAPK signaling	3	2
NFKBIB	chr19	44082454	44091373	44077454	44093373	IkappaB beta	NF-kB signaling		7	7
BCL3	chr19	49943870	49955140	49938870	49957140	Bcl3	NF-kB signaling		2	3
RELB	chr19	50196551	50233292	50191551	50235292	RelB	NF-kB signaling		4	5
EIF2AK2	chr2	37245349	37295719	37243349	37300719	PKR	NF-kB signaling	Innate pathogen detection	10	19
REL	chr2	61020402	61061829	61015402	61063829	c-REL	NF-kB signaling		5	5
CSNK2A1	chr20	411337	472482	409337	477482	CK2	NF-kB signaling		10	25
UBE2V1	chr20	48131069	48165901	48129069	48170901	UBE2V1	NF-kB signaling		7	11
CARD10	chr22	36210900	36239710	36208900	36244710	BIMP1	NF-kB signaling	NF-kB signaling	17	29
BCL6	chr3	188921866	188936950	188919866	188941950	Bcl6	NF-kB signaling		7	11
NFKB1	chr4	103779672	103895661	103774672	103897661	NF-kB p105	NF-kB signaling		16	31
RIPK1	chr6	3022056	3060420	3017056	3062420	RIP	NF-kB signaling	Apoptosis Signaling	6	21
CSNK2B	chr6	31741635	31745822	31736635	31747822	CK2	NF-kB signaling		7	6
NFKBIE	chr6	44334404	44341503	44332404	44346503	IkappaB-epsilon	NF-kB signaling		4	4
CARD11	chr7	2719023	2856711	2717023	2861711	CARMA1/BIMP3	NF-kB signaling		66	101
IKBKB	chr8	42247985	42309122	42242985	42311122	IKKbeta	NF-kB signaling		6	12
CARD9	chr9	136534245	136543945	136532245	136548945	CARMA3/CARD9	NF-kB signaling		9	10
IKBKG	chrX	153339765	153356964	153334765	153358964	NEMO/IKKG	NF-kB signaling		2	1
CTSS	chr1	147515623	147551378	147513623	147556378	cathespin S	Phagocytosis-Ag presentation		2	3
CD1D	chr1	154962809	154967758	154957809	154969758	CD1D	Phagocytosis-Ag presentation		3	6
CD1A	chr1	155036999	155041108	155031999	155043108	CD1A	Phagocytosis-Ag presentation		5	7
CD1C	chr1	155072876	155076477	155067876	155078477	CD1C	Phagocytosis-Ag presentation		3	4
CD1B	chr1	155110851	155114331	155108851	155119331	CD1B	Phagocytosis-Ag presentation		3	6
CD1E	chr1	155136851	155139458	155131851	155141458	CD1E	Phagocytosis-Ag presentation		2	5
PSMA1	chr11	14482998	14621739	14480998	14626739	PSMA1	Phagocytosis-Ag presentation		12	13
LAG3	chr12	6751930	6757880	6746930	6759880	LAG-3	Phagocytosis-Ag presentation		7	6
RFX4	chr12	105479499	105659047	105474499	105661047	regulatory factor X, 4	Phagocytosis-Ag presentation		15	45
PSMB5	chr14	22564899	22573949	22562899	22578949	PSMB5	Phagocytosis-Ag presentation		3	3
PSME1	chr14	23675217	23678015	23670217	23680015	PSME1	Phagocytosis-Ag presentation		1	3
PSME2	chr14	23682413	23685695	23680413	23690695	PSME2	Phagocytosis-Ag presentation		3	3
CIITA	chr16	10878557	10926340	10873557	10928340	CIITA	Phagocytosis-Ag presentation		12	28
CD209	chr19	7710881	7718406	7708881	7723406	CD209, DC-SIGN	Phagocytosis-Ag presentation		11	20
RFX1	chr19	13933352	13978097	13931352	13983097	regulatory factor X, 1	Phagocytosis-Ag presentation		1	10
IFI30	chr19	18145578	18149927	18140578	18151927	IFN-gamma inducible protein 30	Phagocytosis-Ag presentation		2	2
RFXANK	chr19	19164007	19173678	19159007	19175678	regulatory factor X-associated ankyrin-containing protein	Phagocytosis-Ag presentation		1	3
LILRB5	chr19	59446217	59452937	59444217	59457937	CD85K, ILT3	Phagocytosis-Ag presentation		5	6
CD207	chr2	70969002	70974608	70967002	70979608	CD207	Phagocytosis-Ag presentation		13	25
XBP1	chr22	27515102	27521114	27513102	27526114	X-box binding protein 1	Phagocytosis-Ag presentation		2	2
CD74	chr5	149761396	149772511	149759396	149777511	CD74	Phagocytosis-Ag presentation		7	5
PRSS16	chr6	27323486	27332228	27318486	27334228	protease, serine, 16	Phagocytosis-Ag presentation		5	9
HLA-A	chr6	30018309	30021632	30013309	30023632	HLA-A	Phagocytosis-Ag presentation		3	8
HLA-C	chr6	31344508	31347834	31342508	31352834	HLA-C	Phagocytosis-Ag presentation		28	22
HLA-B	chr6	31429629	31432914	31427629	31437914	HLA-B	Phagocytosis-Ag presentation		4	10
HLA-DRA	chr6	32515624	32520799	32510624	32522799	HLA-DRA	Phagocytosis-Ag presentation		5	17
HLA-DQA1	chr6	32713160	32719407	32708160	32721407	HLA-DQA1	Phagocytosis-Ag presentation		2	7
HLA-DQA2	chr6	32817140	32823199	32812140	32825199	HLA-DQA2	Phagocytosis-Ag presentation		9	15
HLA-DQB2	chr6	32831853	32839245	32829853	32844245	HLA-DQB2	Phagocytosis-Ag presentation		9	11
TAP2	chr6	32897587	32914482	32895587	32919482	TAP2	Phagocytosis-Ag presentation		28	27
TAP1	chr6	32920964	32929726	32918964	32934726	TAP1	Phagocytosis-Ag presentation		10	8
PSMB9	chr6	32929933	32935336	32924933	32937336	PSMB9	Phagocytosis-Ag presentation		3	8
HLA-DMB	chr6	33010392	33016795	33008392	33021795	HLA-DMB	Phagocytosis-Ag presentation		19	21
HLA-DMA	chr6	33024373	33028831	33022373	33033831	HLA-DMA	Phagocytosis-Ag presentation		7	8
HLA-DOA	chr6	33079939	33085367	33077939	33090367	HLA-DOA	Phagocytosis-Ag presentation		18	25
HLA-DPA1	chr6	33140771	33149356	33138771	33154356	HLA-DPA1	Phagocytosis-Ag presentation		4	9
HLA-DPB1	chr6	33151737	33162954	33146737	33164954	HLA-DPB1	Phagocytosis-Ag presentation		8	9
TAPBP	chr6	33375451	33389967	33373451	33394967	TAP binding protein	Phagocytosis-Ag presentation		2	4
NFX1	chr9	33280509	33361154	33275509	33363154	NFX1	Phagocytosis-Ag presentation		9	22
PIK3CD	chr1	9646068	9723240	9641068	9725240	PI3K p110	PI3K/AKT Signaling	MAPK signaling	12	26
FRAP1	chr1	11100857	11256830	11098857	11261830	mTOR	PI3K/AKT Signaling		6	18
PIK3R3	chr1	46217832	46310334	46215832	46315334	PI3K p85	PI3K/AKT Signaling	MAPK signaling	7	12
THEM4	chr1	148659605	148695052	148657605	148700052	CTMP	PI3K/AKT Signaling		5	6
AKT3	chr1	239992524	240332594	239990524	240337594	AKT	PI3K/AKT Signaling	NF-kB signaling	13	48
MAP3K8	chr10	30762871	30790767	30757871	30792767	Cot	PI3K/AKT Signaling	NF-kB signaling	10	25
PTEN	chr10	89613174	89716382	89608174	89718382	PTEN	PI3K/AKT Signaling		9	10
ILK	chr11	6581782	6588673	6576782	6590673	ILK	PI3K/AKT Signaling		6	10
RPS6KB2	chr11	66952510	66959454	66947510	66961454	p70 S6K	PI3K/AKT Signaling		3	4
CCND1	chr11	69165053	69178422	69160053	69180422	cyclin D1	PI3K/AKT Signaling		3	7
INPPL1	chr11	71613472	71627796	71608472	71629796	SHIP	PI3K/AKT Signaling		2	2
CDKN1B	chr12	12761575	12766569	12756575	12768569	p27Kip1	PI3K/AKT Signaling		7	6
MDM2	chr12	67488246	67520481	67483246	67522481	MDM2	PI3K/AKT Signaling		9	18
FOXO1A	chr13	40027816	40138734	40025816	40143734	FKHR	PI3K/AKT Signaling		15	23
HSP90AA1	chr14	101617138	101675776	101615138	101680776	HSP90	PI3K/AKT Signaling		7	14
AKT1	chr14	104306733	104330983	104304733	104335983	AKT	PI3K/AKT Signaling	NF-kB signaling	4	9
TSC2	chr16	2038599	2078713	2033599	2080713	TSC2	PI3K/AKT Signaling		8	22
PDPK1	chr16	2527970	2593189	2522970	2595189	PDK1	PI3K/AKT Signaling		2	8
PIK3R5	chr17	8724137	8756559	8722137	8761559	PI3K p101	PI3K/AKT Signaling	MAPK signaling	11	21
MYH4	chr17	10287331	10313601	10285331	10318601	beta-catenin	PI3K/AKT Signaling		5	12
RPS6KB1	chr17	55325224	55382566	55320224	55384566	p70 S6K	PI3K/AKT Signaling		7	9
CDC37	chr19	10362808	10375271	10360808	10380271	Cdc37	PI3K/AKT Signaling		3	5
PIK3R2	chr19	18125015	18142343	18120015	18144343	PI3K p85	PI3K/AKT Signaling	MAPK signaling	3	3
AKT2	chr19	45431555	45483034	45429555	45488034	AKT	PI3K/AKT Signaling	NF-kB signaling	5	8
LIMS1	chr2	108663284	108759405	108658284	108761405	PINCH1	PI3K/AKT Signaling		9	17
INPP5D	chr2	233750540	233898548	233745540	233900548	SHIP	PI3K/AKT Signaling	Leukocyte signaling	53	76
CTNNB1	chr3	41216015	41256938	41211015	41258938	beta-catenin	PI3K/AKT Signaling		4	13
PIK3CB	chr3	139856928	139960883	139854928	139965883	PI3K p110	PI3K/AKT Signaling	MAPK signaling	4	16
PIK3CA	chr3	180349012	180435197	180344012	180437197	PI3K p110	PI3K/AKT Signaling	MAPK signaling	11	11
EIF4E	chr4	100158390	100208294	100156390	100213294	eIF4E	PI3K/AKT Signaling	MAPK signaling	7	16
GAB1	chr4	144615654	144748883	144610654	144750883	GAB1	PI3K/AKT Signaling		14	39
PIK3R1	chr5	67622250	67633403	67617250	67635403	PI3K p85	PI3K/AKT Signaling	MAPK signaling	8	5
CDKN1A	chr6	36754464	36763086	36749464	36765086	p21Cip1	PI3K/AKT Signaling	Cytokine signaling	5	10
HSP90AB1	chr6	44322826	44329592	44317826	44331592	HSP90	PI3K/AKT Signaling		2	3
NOS3	chr7	150125794	150149323	150120794	150151323	eNOS	PI3K/AKT Signaling		6	13
RHEB	chr7	150601443	150654657	150599443	150659657	Rheb	PI3K/AKT Signaling		8	19
TSC1	chr9	132796289	132849574	132794289	132854574	TSC1	PI3K/AKT Signaling		14	23
PRDX1	chr1	45645800	45656702	45643800	45661702	peroxiredoxin 1	ROS/Glutathione/Cytotoxic granules		4	6
NCF2	chr1	180256354	180291668	180254354	180296668	neutrophil cytosolic factor 2	ROS/Glutathione/Cytotoxic granules		10	22
PRF1	chr10	72027110	72032520	72025110	72037520	Perforin	ROS/Glutathione/Cytotoxic granules		7	8
CAT	chr11	34417053	34450179	34412053	34452179	catalase	ROS/Glutathione/Cytotoxic granules		14	27
PRG2	chr11	56911410	56914706	56909410	56919706	proteoglycan 2	ROS/Glutathione/Cytotoxic granules		4	9
CMA1	chr14	24044551	24047311	24042551	24052311	CMA1	ROS/Glutathione/Cytotoxic granules		6	12
GZMH	chr14	24145532	24148704	24143532	24153704	Granzyme H	ROS/Glutathione/Cytotoxic granules		5	5
GZMB	chr14	24170003	24173272	24168003	24178272	Granzyme B	ROS/Glutathione/Cytotoxic granules		10	12
GPX2	chr14	64475624	64479284	64473624	64484284	glutathione peroxidase 2	ROS/Glutathione/Cytotoxic granules		8	8
ANPEP	chr15	88129130	88150938	88127130	88155938	CD13	ROS/Glutathione/Cytotoxic granules		13	29
NOS2A	chr17	23107919	23151682	23105919	23156682	INOS	ROS/Glutathione/Cytotoxic granules		17	29
GZMM	chr19	495026	500919	490026	502919	Granzyme M	ROS/Glutathione/Cytotoxic granules		9	8
PRTN3	chr19	791964	799051	786964	801051	Proteinase 3	ROS/Glutathione/Cytotoxic granules		4	5
ELA2	chr19	803290	807244	798290	809244	ELA2	ROS/Glutathione/Cytotoxic granules		1	1
PRDX2	chr19	12768634	12773694	12766634	12778694	peroxiredoxin 2	ROS/Glutathione/Cytotoxic granules		2	1
BPI	chr20	36365998	36399319	36360998	36401319	BPI	ROS/Glutathione/Cytotoxic granules		18	38
SOD1	chr21	31953805	31963112	31948805	31965112	SOD1	ROS/Glutathione/Cytotoxic granules		3	6
GZMA	chr5	54434229	54441818	54429229	54443818	Granzyme A	ROS/Glutathione/Cytotoxic granules		4	6
GPX3	chr5	150380111	150388741	150375111	150390741	glutathione peroxidase 3	ROS/Glutathione/Cytotoxic granules		9	17
SOD2	chr6	160073582	160084614	160071582	160089614	SOD2	ROS/Glutathione/Cytotoxic granules		3	3
PRDX4	chrX	23445301	23464171	23440301	23466171	peroxiredoxin 4	ROS/Glutathione/Cytotoxic granules		6	7
CYBB	chrX	37395536	37428931	37390536	37430931	cytochrome b-245, beta	ROS/Glutathione/Cytotoxic granules		5	6
TNFRSF4	chr1	1186629	1189435	1184629	1194435	TNFRSF4, OX40	TNF Superfamily Signaling	NF-kB signaling	1	1
TNFRSF14	chr1	2521454	2528915	2519454	2533915	TNFRSF14, LIGHT-R	TNF Superfamily Signaling	NF-kB signaling	2	7
TNFRSF25	chr1	6455481	6460521	6453481	6465521	DR3, APO-3	TNF Superfamily Signaling	NF-kB signaling	5	5
TNFRSF9	chr1	7914172	7935153	7912172	7940153	TNFRSF9, 4-1BB	TNF Superfamily Signaling	NF-kB signaling	3	9
TNFRSF1B	chr1	12161325	12203542	12156325	12205542	TNF-R2, CD120b	TNF Superfamily Signaling	Apoptosis Signaling	18	32
TNFSF18	chr1	169742107	169751713	169740107	169756713	TNFSF18	TNF Superfamily Signaling	NF-kB signaling	5	6
TNFSF4	chr1	169884527	169908128	169882527	169913128	TNFSF4, OX40L, CD252	TNF Superfamily Signaling	NF-kB signaling	9	14
TRAF5	chr1	207888434	207936679	207883434	207938679	TRAF5	TNF Superfamily Signaling	NF-kB signaling	5	12
TRAF6	chr11	36467298	36488398	36465298	36493398	TRAF6	TNF Superfamily Signaling	Innate pathogen detection	4	17
TNFRSF1A	chr12	6308184	6321522	6306184	6326522	TNF-R1, CD120a	TNF Superfamily Signaling	NF-kB signaling	7	9
LTBR	chr12	6363617	6370993	6358617	6372993	lymphotoxin-beta receptor	TNF Superfamily Signaling	NF-kB signaling	4	4
TNFRSF7	chr12	6424327	6431144	6419327	6433144	CD27, TNFRSF7	TNF Superfamily Signaling	NF-kB signaling	12	9
TNFRSF19	chr13	23042722	23148231	23037722	23150231	TNFRSF19	TNF Superfamily Signaling	NF-kB signaling	35	62
TNFSF11	chr13	42046297	42080148	42041297	42082148	RANKL	TNF Superfamily Signaling	NF-kB signaling	8	24
TNFSF13B	chr13	107719977	107757366	107714977	107759366	BAFF	TNF Superfamily Signaling	NF-kB signaling	14	12
TRAF3	chr14	102313568	102442381	102308568	102444381	TRAF3	TNF Superfamily Signaling	NF-kB signaling	12	32
TNFRSF12A	chr16	3010360	3012382	3005360	3014382	TNFRSF12A, TWEAK-R	TNF Superfamily Signaling	NF-kB signaling	3	5
TNFRSF17	chr16	11966464	11969426	11961464	11971426	TNFSF17, BCM, CD269	TNF Superfamily Signaling	NF-kB signaling	8	8
TRADD	chr16	65745604	65751306	65743604	65756306	TRADD	TNF Superfamily Signaling	Apoptosis Signaling	1	3
TNFSF12	chr17	7393098	7401930	7388098	7403930	APO-3L, TWEAK, DR3L	TNF Superfamily Signaling	NF-kB signaling	6	10
TNFRSF13B	chr17	16783123	16816127	16781123	16821127	TNFRSF13B, CD267	TNF Superfamily Signaling	NF-kB signaling	13	24
TNFRSF11A	chr18	58143527	58204482	58138527	58206482	TNFR4, TRANCE	TNF Superfamily Signaling	NF-kB signaling	36	42
TNFSF9	chr19	6482036	6486933	6477036	6488933	TNFSF9, 4-1BB-L	TNF Superfamily Signaling	NF-kB signaling	3	3
TNFSF7	chr19	6536851	6542163	6534851	6547163	TNFSF7, CD70, CD27L	TNF Superfamily Signaling	NF-kB signaling	10	12
TNFSF14	chr19	6615565	6621599	6613565	6626599	TNFSF14, LIGHT, CD258	TNF Superfamily Signaling	NF-kB signaling	3	5
TNFAIP6	chr2	152039612	152062067	152034612	152064067	TNFAIP6	TNF Superfamily Signaling	Innate pathogen detection	5	8
TNFRSF13C	chr22	40645535	40647282	40643535	40652282	TNFRSF13C, BAFF-R	TNF Superfamily Signaling	NF-kB signaling	2	1
PTX3	chr3	158637308	158644078	158632308	158646078	pentraxin-3, TNFAIP5	TNF Superfamily Signaling		3	6
TNIP1	chr5	150389709	150440842	150387709	150445842	TNFAIP3 interacting protein 1	TNF Superfamily Signaling	NF-kB signaling	29	56
TTRAP	chr6	24758184	24775094	24756184	24780094	TTRAP	TNF Superfamily Signaling	NF-kB signaling	12	14
LTA	chr6	31648071	31650077	31643071	31652077	lymphotoxin-alpha	TNF Superfamily Signaling	NF-kB signaling	4	3
TNF	chr6	31651328	31654091	31646328	31656091	TNF-alpha	TNF Superfamily Signaling	Apoptosis Signaling	1	4
TNFAIP3	chr6	138230273	138246141	138225273	138248141	A20	TNF Superfamily Signaling	NF-kB signaling	3	9
TNFRSF11B	chr8	120004977	120033492	120002977	120038492	TNFRSF11B	TNF Superfamily Signaling	NF-kB signaling	20	26
TNFSF15	chr9	114631165	114647962	114629165	114652962	TNFSF15, TL1A	TNF Superfamily Signaling	NF-kB signaling	6	9
TNFSF8	chr9	114744677	114772324	114742677	114777324	TNFSF8, CD153, CD30L	TNF Superfamily Signaling	NF-kB signaling	8	7
TRAF1	chr9	120744225	120768727	120742225	120773727	TRAF1	TNF Superfamily Signaling	NF-kB signaling	4	10
TRAF2	chr9	137056801	137096903	137051801	137098903	TRAF2	TNF Superfamily Signaling	Apoptosis Signaling	4	8
