# Supplementary material for: Assembly of Inflammation-Related Genes for Pathway-Focused Genetic Analysis
Source: PLoS One. 2007 Oct 17;2(10):e1035. doi: 10.1371/journal.pone.0001035 (PMC2001184; doi:10.1371/journal.pone.0001035)
Supplement: Table S2 — Genes with big intronic regions (0.06 MB XLS) [file pone.0001035.s002.xls]

## Sheet: Summary
Table S2. Genes with big intronic regions.
geneID	chromo location	Regions with r2>=0.8	Regions with r2>=0.5*
PRKCE	chr2:45785693..46328779	chr2:45785694..45796238	chr2:45796238..45976790
		chr2:45976790..45986853	chr2:45986853..46110219
		chr2:46110219..46328779
ADCY2	chr5:7444344..7885194	chr5:7444345..7472883	chr5:7472883..7568851
		chr5:7568851..7579012	chr5:7579012..7674280
		chr5:7674280..7684429	chr5:7684429..7738804
		chr5:7738804..7885194
DAPK1	chr9:87337309..87555102	chr9:87336697..87348608	chr9:87348608..87444423
		chr9:87444423..87555100
CAMK1D	chr10:12426588..12913737	chr10:12426589..12436915	chr10:12436915..12630230
		chr10:12630230..12640361	chr10:12640361..12743741
		chr10:12743741..12753815	chr10:12753815..12837953
		chr10:12837953..12913737
PDE3A	chr12:20408485..20727646	chr12:20408486..20419445	chr12:20419445..20595861
		chr12:20595861..20605911	chr12:20605911..20652644
		chr12:20652644..20727646
PRKCA	chr17:61724387..62239324	chr17:61724388..61737707	chr17:61737707:61917781
		chr17:61917781..61927863	chr17:61927863..62062935
		chr17:62062935..62239324
PLCB1	chr20:8056295..8815547	chr20:8056296..8084018	chr20:8084018..8295029
		chr20:8295029..8300097	chr20:8305097..8551941
		chr20:8551941..8735820	chr20:8735820..8805269
		chr20:8805269..8815547
* Less strigent r2 criteria (>=0.5) was used for choosing tSNPs for these intronic regions.

## Sheet: Sheet1
chromo location	geneID		exon	start	end	intron	start_new	end_new	exon_new	intron_new
chr2:45785693..46328779	PRKCE	redo	Exon 1	45790694	45791238		45785694	45796238	chr2:45785694..45796238	chr2:45796238..45976790
Save 94 tSNPs		Intron1	Exon 2	45981790	45981853	190552	45976790	45986853	chr2:45976790..45986853	chr2:45986853..46110219
		Intron2	Exon 3	46115219	46115378	133366	46110219		chr2:46110219..46328779
			Exon 4	46117766	46117800	2388
			Exon 5	46119086	46119171	1286
			Exon 6	46123341	46123470	4170
			Exon 7	46140194	46140336	16724
			Exon 8	46143332	46143428	2996
			Exon 9	46146252	46146451	2824
			Exon 10	46149134	46149307	2683
			Exon 11	46224998	46225152	75691
			Exon 12	46283883	46284021	58731
			Exon 13	46289831	46290019	5810
			Exon 14	46298396	46298542	8377
			Exon 15	46323525	46326779	24983		46328779
							start_new	end_new	exon_new	intron_new
chr7:31600486..31889231	PDE1C		Exon 1	31883145	31883701	19295
No saving			Exon 2	31864406	31864432	170832
			Exon 3	31693600	31693713	1864
			Exon 4	31691849	31692031	1208
			Exon 5	31690823	31690889	4744
			Exon 6	31686145	31686261	8465
			Exon 7	31677796	31677936	14441
			Exon 8	31663495	31663595	2773
			Exon 9	31660822	31660950	10226
			Exon 10	31650724	31650825	791
			Exon 11	31650034	31650154	9008
			Exon 12	31641146	31641227	3506
			Exon 13	31637721	31637841	1914
			Exon 14	31635927	31636102	7324
			Exon 15	31628778	31629008	7123
			Exon 16	31621885	31621962	33444
			Exon 17	31588518	31588586	22714
			Exon 18	31565872	31566407		31563872
							start_new	end_new	exon_new	intron_new
chr10:12426588..12913737	CAMK1D	redo	Exon 1	12431589	12431915		12426589	12436915	chr10:12426589..12436915	chr10:12436915..12630230
Save 66 tSNPs		Intron1	Exon 2	12635230	12635361	203315	12630230	12640361	chr10:12630230..12640361	chr10:12640361..12743741
		Intron2	Exon 3	12748741	12748815	113380	12743741	12753815	chr10:12743741..12753815	chr10:12753815..12837953
		Intron3	Exon 4	12842953	12843091	94138	12837953		chr10:12837953..12913737
			Exon 5	12851678	12851804	8587
			Exon 6	12873163	12873238	21359
			Exon 7	12896200	12896312	22962
			Exon 8	12898255	12898333	1943
			Exon 9	12906470	12906557	8137
			Exon 10	12907578	12907695	1021
			Exon 11	12910774	12911737	3079		12913737
							start_new	end_new	exon_new	intron_new
chr12:20408485..20727646	PDE3A	redo	Exon 1	20413486	20414445		20408486	20419445	chr12:20408486..20419445	chr12:20419445..20595861
Save 46 tSNPs			Exon 2	20600861	20600911	186416	20595861	20605911	chr12:20595861..20605911	chr12:20605911..20652644
			Exon 3	20657644	20657901	56733	20652644		chr12:20652644..20727646
			Exon 4	20660431	20660585	2530
			Exon 5	20665497	20665612	4912
			Exon 6	20674109	20674328	8497
			Exon 7	20677894	20677979	3566
			Exon 8	20679103	20679257	1124
			Exon 9	20681301	20681438	2044
			Exon 10	20684047	20684158	2609
			Exon 11	20690691	20690804	6533
			Exon 12	20690952	20691151	148
			Exon 13	20692889	20693092	1738
			Exon 14	20694646	20694801	1554
			Exon 15	20698148	20698406	3347
			Exon 16	20724231	20725646	25825		20727646
							start_new	end_new	exon_new	intron_new
chr16:80365430..80551399	PLCG2		Exon 1	80370431	80370530		80365431		chr16:80365431..80382288	chr16:80382288..80440550
save 2 SNPs			Exon 2	80377049	80377288	6519		80382288	chr16:80440550..80551399
		intron2	Exon 3	80445550	80445693	68262	80440550
			Exon 4	80449369	80449462	3676
			Exon 5	80450222	80450269	760
			Exon 6	80460320	80460404	10051
			Exon 7	80461958	80462041	1554
			Exon 8	80472016	80472059	9975
			Exon 9	80474375	80474447	2316
			Exon 10	80480278	80480379	5831
			Exon 11	80482578	80482696	2199
			Exon 12	80484815	80484900	2119
			Exon 13	80486913	80487033	2013
			Exon 14	80491718	80491886	4685
			Exon 15	80496509	80496613	4623
			Exon 16	80498791	80498880	2178
			Exon 17	80499522	80499697	642
			Exon 18	80501626	80501826	1929
			Exon 19	80503703	80503822	1877
			Exon 20	80510590	80510770	6768
			Exon 21	80512304	80512375	1534
			Exon 22	80514591	80514700	2216
			Exon 23	80518188	80518284	3488
			Exon 24	80519664	80519730	1380
			Exon 25	80522603	80522760	2873
			Exon 26	80525535	80525637	2775
			Exon 27	80527275	80527484	1638
			Exon 28	80528864	80529009	1380
			Exon 29	80529907	80530021	898
			Exon 30	80530998	80531165	977
			Exon 31	80537281	80537369	6116
			Exon 32	80547801	80547985	10432
			Exon 33	80549062	80549399	1077		80551399
							start_new	end_new	exon_new	intron_new
chr16:23749822..24141063	PRKCB1		Exon 1	23754823	23755170		23749823
			Exon 2	23756197	23756228	1027		23761228
			Exon 3	23907330	23907412	151102	23902330
			Exon 4	23950958	23951069	43546
			Exon 5	23954241	23954369	3172		23959369
			Exon 6	24011613	24011769	57244	24006613
			Exon 7	24012985	24013119	1216
			Exon 8	24031795	24031891	18676
			Exon 9	24042657	24042803	10766
			Exon 10	24073506	24073679	30703
			Exon 11	24091092	24091183	17413
			Exon 12	24093340	24093402	2157
			Exon 13	24099612	24099750	6210
			Exon 14	24103933	24104013	4183
			Exon 15	24104282	24104389	269
			Exon 16	24109912	24110052	5523
			Exon 17	24133480	24134824	23428
							start_new	end_new	exon_new	intron_new
chr17:61724387..62239324	PRKCA	redo	Exon 1	61729388	61729604		61724388		chr17:61724388..61737707	chr17:61737707:61917781
Save 9 tSNPs			Exon 2	61732676	61732707	3072		61737707	chr17:61917781..61927863	chr17:61927863..62062935
		intron3	Exon 3	61922781	61922863	190074	61917781	61927863	chr17:62062935..62239324
		intron4	Exon 4	62067935	62068046	145072	62062935
			Exon 5	62071963	62072091	3917
			Exon 6	62113691	62113847	41600
			Exon 7	62114882	62115016	1035
			Exon 8	62115531	62115627	515
			Exon 9	62159268	62159405	43641
			Exon 10	62162069	62162242	2664
			Exon 11	62165344	62165435	3102
			Exon 12	62168239	62168301	2804
			Exon 13	62169202	62169340	901
			Exon 14	62200567	62200647	31227
			Exon 15	62213447	62213554	12800
			Exon 16	62215419	62215559	1865
			Exon 17	62230453	62237324	14894		62239324
							start_new	end_new	exon_new	intron_new
chr20:8056295..8815547	PLCB1	redo	Exon 1	8061296	8061397		8056296		chr20:8056296..8084018	chr20:8084018..8295029
Save 74 tSNPs			Exon 2	8078941	8079018	17544		8084018	chr20:8295029..8300097	chr20:8305097..8551941
		intron2	Exon 3	8300029	8300097	221011	8295029	8305097	chr20:8551941..8735820	chr20:8735820..8805269
		intron3	Exon 4	8556941	8557078	256844	8551941		chr20:8805269..8815547
			Exon 5	8574749	8574828	17671
			Exon 6	8576547	8576600	1719
			Exon 7	8578021	8578096	1421
			Exon 8	8585831	8585931	7735
			Exon 9	8587185	8587351	1254
			Exon 10	8613579	8613725	26228
			Exon 11	8626273	8626430	12548
			Exon 12	8637317	8637399	10887
			Exon 13	8644911	8644995	7512
			Exon 14	8646318	8646495	1323
			Exon 15	8651001	8651068	4506
			Exon 16	8653303	8653399	2235
			Exon 17	8655956	8656040	2557
			Exon 18	8657697	8657821	1657
			Exon 19	8661885	8662039	4064
			Exon 20	8665675	8665839	3636
			Exon 21	8667908	8668007	2069
			Exon 22	8668991	8669095	984
			Exon 23	8670111	8670220	1016
			Exon 24	8685693	8685825	15473
			Exon 25	8689054	8689107	3229
			Exon 26	8693786	8694005	4679
			Exon 27	8703186	8703366	9181
			Exon 28	8717096	8717172	13730
			Exon 29	8717280	8717369	108
			Exon 30	8718165	8718222	796
			Exon 31	8718822	8718908	600
			Exon 32	8730703	8730820	11795		8735820
		intron32	Exon 33	8810269	8813547	79449	8805269	8815547
							start_new	end_new	exon_new	intron_new
chr5:7444344..7885194	ADCY2		Exon 1	7449345	7449619		7444345		chr5:7444345..7472883	chr5:7472883..7568851
Save 12 tSNPs	Not_In_Final		Exon 2	7467686	7467883	18067		7472883	chr5:7568851..7579012	chr5:7579012..7674280
		intron2	Exon 3	7573851	7574012	105968	7568851	7579012	chr5:7674280..7684429	chr5:7684429..7738804
		intron3	Exon 4	7679280	7679429	105268	7674280	7684429	chr5:7738804..7885194
		intron4	Exon 5	7743804	7743952	64375	7738804
			Exon 6	7748865	7748976	4913
			Exon 7	7751360	7751487	2384
			Exon 8	7759857	7760015	8370
			Exon 9	7760819	7760951	804
			Exon 10	7762324	7762500	1373
			Exon 11	7765969	7766012	3469
			Exon 12	7770270	7770350	4258
			Exon 13	7777658	7777727	7308
			Exon 14	7780277	7780374	2550
			Exon 15	7796781	7796865	16407
			Exon 16	7810562	7810699	13697
			Exon 17	7819800	7819919	9101
			Exon 18	7826045	7826214	6126
			Exon 19	7837478	7837562	11264
			Exon 20	7842755	7842913	5193
			Exon 21	7855331	7855477	12418
			Exon 22	7857698	7857805	2221
			Exon 23	7869979	7870093	12174
			Exon 24	7873678	7873802	3585
			Exon 25	7879832	7883194	6030		7885194
							start_new	end_new	exon_new	intron_new
chr9:87337309..87555102	DAPK1	redo	Exon 1	87341697	87341771		87336697		chr9:87336697..87348608	chr9:87348608..87444423
Save 12 tSNPs			Exon 2	87343439	87343608	1668		87348608	chr9:87444423..87555100
		intron2	Exon 3	87449423	87449644	105815	87444423
			Exon 4	87482412	87482550	32768
			Exon 5	87483823	87483952	1273
			Exon 6	87484119	87484167	167
			Exon 7	87484258	87484284	91
			Exon 8	87484767	87484919	483
			Exon 9	87485271	87485316	352
			Exon 10	87486438	87486527	1122
			Exon 11	87487845	87487937	1318
			Exon 12	87490364	87490483	2427
			Exon 13	87490930	87491028	447
			Exon 14	87491774	87491872	746
			Exon 15	87493250	87493348	1378
			Exon 16	87494390	87494587	1042
			Exon 17	87495996	87496193	1409
			Exon 18	87502498	87502596	6305
			Exon 19	87513066	87513143	10470
			Exon 20	87525873	87526095	12730
			Exon 21	87531020	87531208	4925
			Exon 22	87541476	87541673	10268
			Exon 23	87543125	87543263	1452
			Exon 24	87544586	87544706	1323
			Exon 25	87547498	87547686	2792
			Exon 26	87550601	87553100	2915		87555100
chr9:36826530..37029476	PAX5		Exon 1	37023983	37024476	13843
			Exon 2	37010633	37010798	5804
			Exon 3	37004994	37005191	8721
			Exon 4	36996470	36996534	3889
			Exon 5	36992645	36992773	36227
			Exon 6	36956546	36956721	43369
			Exon 7	36913352	36913481	41480
			Exon 8	36872001	36872102	35262
			Exon 9	36836840	36836926	8395
			Exon 10	36828531	36830633
				36828531-36830633

## Sheet: exons
chr2:45785694..45796238
chr2:45976790..45986853
chr2:46110219..46328779
chr10:12426589..12436915
chr10:12630230..12640361
chr10:12743741..12753815
chr10:12837953..12913737
chr12:20408486..20419445
chr12:20595861..20605911
chr12:20652644..20727646
chr17:61724388..61737707
chr17:61917781..61927863
chr17:62062935..62239324
chr20:8056296..8084018
chr20:8295029..8300097
chr20:8551941..8735820
chr20:8805269..8815547
chr9:87336697..87348608
chr9:87444423..87555100

## Sheet: introns
chr2:45796238..45976790
chr2:45986853..46110219
chr5:7472883..7568851
chr5:7579012..7674280
chr5:7684429..7738804
chr9:87348608..87444423
chr10:12436915..12630230
chr10:12640361..12743741
chr10:12753815..12837953
chr12:20419445..20595861
chr12:20605911..20652644
chr17:61737707:61917781
chr17:61927863..62062935
chr20:8084018..8295029
chr20:8305097..8551941
chr20:8735820..8805269
