# Supplementary material for: Assembly of Inflammation-Related Genes for Pathway-Focused Genetic Analysis
Source: PLoS One. 2007 Oct 17;2(10):e1035. doi: 10.1371/journal.pone.0001035 (PMC2001184; doi:10.1371/journal.pone.0001035)
Supplement: Table S3 — SNPs chosen for the six genes without HapMap genotyping data (0.04 MB XLS) [file pone.0001035.s003.xls]

## Sheet: Sheet1
Table S3. SNPs chosen for the six genes without HapMap genotyping data
rsId	chrom	position	strand	geneID	NCBI build used	alleles	Allele IUPAC Code	In WFINFLAM_CEU?	In WFINFLAM_YRI?	5' Flank sequence (50 bp)	3' Flank sequence (50 bp)
rs5744174	chr1	221351151	-1	TLR5	36	C/T	Y	X	X	TCACTATAGCTGGGCCTCCTGCAGACATATATTGTGTGTACCCTGACTCG	TCTCTGGGGTTTCCCTCTTCTCTCTTTCCACGGAAGGTTGTGATGAAGAG
rs2072493	chr1	221351222	-1	TLR5	36	A/G	R	X	X	TATAACTCATAACAAGTTCATTTGTGAATGTGAACTTAGCACTTTTATCA	TTGGCTTAATCACACCAATGTCACTATAGCTGGGCCTCCTGCAGACATAT
rs5744168	chr1	221351823	-1	TLR5	36	C/T	Y	X	X	TTCAAGACCAAACATTCAAATTCCTGGAAAAATTACAGACCTTGGATCTC	GAGACAATGCTCTTACAACCATTCATTTTATTCCAAGCATACCCGATATC
rs851186	chr1	221372033	-1	TLR5	36	G/T	K		X	GTAGTACCTGGCACAACTTAAGTACCCCAGCAATATTTTTCTCCATTAAT	TTTTGAAGACAGGACTGGGCATGGTGGCTCATGCCTGTAATCCCAGCACT
rs5744143	chr1	221375782	-1	TLR5	36	C/G	S		X	AGATACATAGTGGAAAATGATGTTATTAATGTACCGATGAAAAAAATGGA	CCACATATATCCTAGCTTTAAATAGCAACTTTTRCCCCCCTCAAGAAATT
rs2192616	chr1	221378143	-1	TLR5	36	A/G	R		X	TTTGTGTGTGGGGGTGGGGGTGGAGGGGTCTCACTATGTTGCCCAGACTG	TCTTGAACTATTGGTTTCAAACAATCCTCCTACCTTGGCCTCCCAAGGTA
rs1640827	chr1	221378230	-1	TLR5	36	A/G	R		X	GGCCTCCCAAGGTATTACAGGCATGAACTACTGTACCCAGCCTCTTTCTT	TATGAATCTCCTTGKGGGTTTTGTTTTGTTTTGTTTTGTTTTGTTTAGCA
rs5744129	chr1	221378708	-1	TLR5	36	C/G	S	X		GGACAAGGTTTTTTCAAACCTATGAGGCAGGTGGAGATGGTGTGCTGCAG	TGTAGGATTCCCTGGCCTGGGGAGAAGTCCACTTATATGTCTCTGAGTAC
rs1361642	chr1	221379533	-1	TLR5	36	A/G	R		X	CAGGAATTAGCTAGGGAGAGCAGTAGGCATTCCTGGCCAAGGCTGCCAAA	AGCATGGACAAAGGAGAAGAGAGAGCCTAGGCCTGGGGAGCTACCTGGGG
rs5744121	chr1	221379942	-1	TLR5	36	C/T	Y		X	TATCAAACGCCTCTTATGTGCCAGACACCAAATTCYGCTCAGGGGAGCCC	ATGTAAGTGAGACACAGCTCTGCTTCAGTGAGTGAGTCAAAGATCCCTTA
rs5744109	chr1	221382103	-1	TLR5	36	C/T	Y	X	X	GCAGTCAGGCTCTTGCAGGGCCNATGTGGTTTCATCAATTTTCTCCTGCA	TTACCCAGCCCCTCCGAATTCTGAGAAGTGCGTCCAAGATCTCTTGGACT
rs1640817	chr1	221382407	-1	TLR5	36	C/T	Y		X	AACACTAGGTAACAACACCGCTCTCCCTCCTCCGGGAGAAAGCCGCAGCC	TCGATTCCCACCCAACAGGYCCTCAGCGCCTTCCCAGGGCAGCACCCTCA
rs5744105	chr1	221382700	-1	TLR5	36	C/G	S		X	TGCCTGGTGCTGTGGGGTGGGGTGTTTAGGGCCTTTTGTTGAGCAGCTCA	TGACTTTCTGGGATTTCCATGGCCCTGCTGGAGATGGCCCTCTGTCTCCC
rs5744096	chr1	221384152	-1	TLR5	36	A/G	R		X	GTAAAACAAAGCCTGGCACTTAATWACAGTGCAAAGATCTCATTATAGAG	CTTCTCAGCTCCCCTCCTCGGCTGGCAGCTTGAAGCCTGAGTGACAAATT
rs6441971	chr3	46366075	1	CCR2	36	C/T	Y	X	X	TTACCATTTTGTTCTTTTAATTTCTATTTCTAATCATACATTCTTGTCTA	TCCTGGTTCATCTGGAGACAAAGTTGAACTTAGAAGATGGAGGAGAAATT
rs3918358	chr3	46369423	1	CCR2	36	A/C	M	X	X	TCTTTCCAAGGAGGGGCATTTAAAATAACTGAGGTTCTTCTTGCTAAGGA	GTTCCTGACACAAGAGATAATTTAGCATTTCCTTTTCATTAAAAAGTTTG
rs3762823	chr3	46371620	1	CCR2	36	A/G	R	X	X	CATTTATTGGTGCCTCCTTTAGCCAGGTACTATCATAAGAGCTGAAAATA	AAGCATAATCCAGTCCTTGATCTTGAGGAACATGCTGTGTGTAGCAGATA
rs1799864	chr3	46374212	1	CCR2	36	A/G	R	X	X	CGCTCTACTCGCTGGTGTTCATCTTTGGTTTTGTGGGCAACATGCTGGTC	TCCTCATCTTAATAAACTGCAAAAAGCTGAAGTGCTTGACTGACATTTAC
rs1799865	chr3	46374802	1	CCR2	36	C/T	Y	X	X	GTCATCTTCACCATCATGATTGTTTACTTTCTCTTCTGGACTCCCTATAA	ATTGTCATTCTCCTGAACACCTTCCAGGAATTCTTCGGCCTGAGTAACTG
rs11575061	chr3	46377247	1	CCR2	36	C/G	S	X	X	AACTTGGGAACTAGACTCCCAAGCTGGACTATGGCTCTACTTTCAGGCCA	ATGGCTAAAGAAGGTTTCAGAAAGAAGTGGGGACAGAGCAGAACTTTCAC
rs3136536	chr3	46384640	1	CCR5	36	C/T	Y		X	AGAAATGGTGTGAGCAAGGAGACAGCAAAGCAATGCTTGGAACATAGGTG	AGTGACTAGACATGGGGCAGCTGTTTAAAGACAAAAAGGCCCCAAAAAGG
rs7637813	chr3	46385040	1	CCR5	36	A/G	R		X	AGTGGTTACTAGAACACACCTCTGGACCAGAAACRCAAAAGTGGAGTAAC	CACACTGCAAAGCTGTGCTTCCTTGTTTCAGCCTGTGAATCCTCACCTTG
rs2856757	chr3	46385498	1	CCR5	36	A/C	M		X	ACAAGTGGATTACCAGTGAATACAAGGCTATCTATCTTTYGAAAAACCAA	GTTGYATTTATGYTATCTATTTTCTATAAAATTTTATATTAATTTATTTG
rs2227010	chr3	46386546	1	CCR5	36	A/G	R		X	GTCTTCTCAGCTCTGCTGACAATACTTGAGATTTTCAGATGTCACCAACC	CCAAGAGAGCTTGATATGACTGTATATAGTATAGTCATAAAGAACCTGAA
rs2734648	chr3	46386844	1	CCR5	36	G/T	K	X	X	TGTTTAGCTCACCCGTGAGCCCATAGTTAAAACTCTTTAGACAACAGGTT	TTTCCGTTTACAGAGAACAATAATATTGGGTGGTGAGCATCTGTGTGGGG
rs1799987	chr3	46386939	1	CCR5	36	A/G	R		X	GTGGGGGTTGGGGTGNGATAGGGGATACGGGGAGAGTGGAGAAAAAGGGG	CACAGGGTTAATGNGAAGTCCAGGATCCCCCTCTACATTTAAAGTTGGTT
rs1800024	chr3	46387563	1	CCR5	36	C/T	Y		X	TAGTTAGCTTCTGARATGAGTAAAAGACTTTACAGGAAACCCATAGAAGA	ATTTGGCAAACACCAAGTGCTCATACAATTATCTTAAAATATAATCTTTA
rs9282632	chr3	46387712	1	CCR5	36	A/C	M		X	ATCAAAGATACAAAACATGATTGTGAGTGAAAGACTTTAAAGGGAGCAAT	GTATTTTAATAACTAACAATCCTTACCTCTCAAAAGAAAGATTTGCAGAG
rs3181037	chr3	46387934	1	CCR5	36	A/G	R	X	X	TTTCTTTTTCCTCCAGACAAGAGGGAAGCCTAAAAATGGTCAAAATTAAT	TTAAATTACAAACGCCAAATAAAATTTTCCTCTAATATATCAGTTTCATG
rs3087253	chr3	46393693	1	CCR5	36	C/T	Y	X	X	TCATGTCAATTGCTCGTTTTTCCTTTTCCATCTTATTAAATGTCTTCCAA	GTTAGCACGAAGAAAAGCTATTTGCAGTGTTGCCAGCCTTTCCAGAGCCC
rs916092	chr3	46418773	1	CCRL2	36	A/T	W	X	X	AGCTGTATTTTAGAAATATTATCTGCCCTCCCAGGTATCACAGCTACTAA	TATTGGGTACTGAGGTGGAATTTTAGGGATCAGCCAATTATGGGAAAGAA
rs2157062	chr3	46426651	1	CCRL2	36	C/T	Y	X	X	ACTCACTGGTCTCTTTATAATCTTGCTTCTGGCCCTTTGAGGCCTCAAAG	TACCAGGGCCTTGCTGCCAGGGGACAATCACCGCTCCCGGCTGAGTCCTG
rs6607439	chrX	1415831	1	IL3RA	36	C/T	Y	X	X	GGCTGTATCTTCCACACAGCACTTTGATCTCCATTTAAGGTAAGGTCCCC	CTCCAGGGTGGGATGAGGGAAAAAGAGGGCAGGCAGGGGAGGCGGTGGAC
rs7391312	chrX	1433247	1	IL3RA	36	A/G	R	X	X	ACTTTCAGTCCACGATACCCGAGCTCCGAGGAACCTCCCAGGTGGTGA	AATGTCAATATGCCCAGAGCTGACGTGCCCTGAACCCAAGGGCAGGGTGC
rs7059370	chrX	1438468	1	IL3RA	36	C/T	Y	X	X	TCCCTTTTTCCCTCCCTCTATCTTTCTGGCTCTCTCCCTGTGTCTATCTC	CCCTGTCCCCATCTCTCTCTGTGTCTCTTTCCCTCCCTCTCTCATTCTCC
rs5982829	chrX	2624082	1	CD99	36	A/G	R	X	X	AGGGAAAAACAAACCAAACTTTATTAACATGCGTTTTTCATTGATACATG	GAGATACCTAGAAATGGGTAGTTTTCAAGGAAGTGGCTTGGATTCTAGCT
rs311055	chrX	2634467	1	CD99	36	A/G	R	X	X	AAAAAACAAAAAACGCTTTGCCTTTGCTTGGCATCAGAGGACTCAGCAGC	AGTAAAGAGCACACACGTGCCCTCTGCACCACCTCCTCCTCCTTTTCTAC
rs311077	chrX	2645489	1	CD99	36	C/G	S	X	X	CCATGGCCGGTAGCAGCCTCTGTGTCTGTCTTCTGGGCTCAAGAGTCGTT	TATAAACCTCAGCTCGGTGTGGGCAGGTGAGAAAAAACAATGCTAAAAAC
rs5939307	chrX	2647230	1	CD99	36	C/T	Y	X	X	ATGGTGAACTGTCACATCAGTTGCGGAGCACATATGGGTTGCTAGAGCCA	GTTTTAGACACCCTCTAGCCTAAATCTGATCACAGTCATCTGTCCCCTTC
rs4575010	chrX	2654302	1	CD99	36	C/T	Y	X	X	TCTGCACCGTGCGTGTCTCAATCACGATGCTGTGTGCTTCCTCCTGCAGC	GACGCCCCAGGCGTGATCCCCGGGATTGTGGGGGCTGTCGTGGTCGCCGT
rs311095	chrX	2665132	1	CD99	36	C/T	Y	X	X	GGGAGGTAGAAGGGGGGACAGGAGAGCCAATTCAACCTGAGAAGGATGAT	GGTGGAGGTGGGTAAAGGAAGAAAGTCCCCTTTCCCTAGGTACTGAAAAG
rs11556080	chrX	2666261	1	CD99	36	A/G	R	X	X	CCTCTCTGTGTATTTTCTTCTTCTTTTCAGCAGAACAAGGGGAGGTGGAC	TGGAGAGCCACCGGAATGCCAACGCAGAGCCAGCTGGTAAGAAGGACGGG

## Sheet: Sheet2
rs851186	chr1	221372033	-1	TLR5	36	G/T	K		X
rs851176	chr1	221373751	-1	TLR5	36	C/T	Y		X
rs5744143	chr1	221375782	-1	TLR5	36	C/G	S		X
rs2192616	chr1	221378143	-1	TLR5	36	A/G	R		X
rs1640827	chr1	221378230	-1	TLR5	36	A/G	R		X
rs1361642	chr1	221379533	-1	TLR5	36	A/G	R		X
rs5744121	chr1	221379942	-1	TLR5	36	C/T	Y		X
rs1640817	chr1	221382407	-1	TLR5	36	C/T	Y		X
rs5744105	chr1	221382700	-1	TLR5	36	C/G	S		X
rs5744096	chr1	221384152	-1	TLR5	36	A/G	R		X
rs3136536	chr3	46384640	1	CCR5	36	C/T	Y		X
rs7637813	chr3	46385040	1	CCR5	36	A/G	R		X
rs2856757	chr3	46385498	1	CCR5	36	A/C	M		X
rs2227010	chr3	46386546	1	CCR5	36	A/G	R		X
rs1799987	chr3	46386939	1	CCR5	36	A/G	R		X
rs1800024	chr3	46387563	1	CCR5	36	C/T	Y		X
rs9282632	chr3	46387712	1	CCR5	36	A/C	M		X
