# Supplementary material for: Assembly of Inflammation-Related Genes for Pathway-Focused Genetic Analysis
Source: PLoS One. 2007 Oct 17;2(10):e1035. doi: 10.1371/journal.pone.0001035 (PMC2001184; doi:10.1371/journal.pone.0001035)
Supplement: Table S4 — Annotation for tSNPs in WFINFLAM_CEU panel (1.64 MB XLS) [file pone.0001035.s004.xls]

## Sheet: WF_passingSNPs_pathway
Table S4. Annotation for tSNPs in WFINFLAM_CEU panel
rsId	chrom	position	geneID	PROTEIN	PATHWAY	Genome Build
rs11721	chr1	1192554	TNFRSF4	TNFRSF4	TNF Superfamily Signaling	35
rs2459994	chr1	2056226	PRKCZ	PKCaeta	ERK/MAPK Signaling	35
rs12755035	chr1	2058523	PRKCZ	PKCaeta	ERK/MAPK Signaling	35
rs7513222	chr1	2060063	PRKCZ	PKCaeta	ERK/MAPK Signaling	35
rs908742	chr1	2065418	PRKCZ	PKCaeta	ERK/MAPK Signaling	35
rs3128291	chr1	2090185	PRKCZ	PKCaeta	ERK/MAPK Signaling	35
rs3128296	chr1	2101068	PRKCZ	PKCaeta	ERK/MAPK Signaling	35
rs3753242	chr1	2101843	PRKCZ	PKCaeta	ERK/MAPK Signaling	35
rs12026349	chr1	2106266	PRKCZ	PKCaeta	ERK/MAPK Signaling	35
rs2503706	chr1	2107413	PRKCZ	PKCaeta	ERK/MAPK Signaling	35
rs262661	chr1	2118807	PRKCZ	PKCaeta	ERK/MAPK Signaling	35
rs262688	chr1	2145727	PRKCZ	PKCaeta	ERK/MAPK Signaling	35
rs2234167	chr1	2522390	TNFRSF14	TNFRSF14	TNF Superfamily Signaling	35
rs2234161	chr1	2525515	TNFRSF14	TNFRSF14	TNF Superfamily Signaling	35
rs7411202	chr1	3802308	DFFB	CAD	Apoptosis Signaling	35
rs10797348	chr1	3804253	DFFB	CAD	Apoptosis Signaling	35
rs6670527	chr1	3810906	DFFB	CAD	Apoptosis Signaling	35
rs4074709	chr1	3820105	DFFB	CAD	Apoptosis Signaling	35
rs4073324	chr1	3821152	DFFB	CAD	Apoptosis Signaling	35
rs3205087	chr1	3823399	DFFB	CAD	Apoptosis Signaling	35
rs11584721	chr1	3825928	DFFB	CAD	Apoptosis Signaling	35
rs7367066	chr1	3826912	DFFB	CAD	Apoptosis Signaling	35
rs3138158	chr1	6454578	TNFRSF25	DR3	TNF Superfamily Signaling	35
rs3138156	chr1	6457696	TNFRSF25	DR3	TNF Superfamily Signaling	35
rs2986754	chr1	6460731	TNFRSF25	DR3	TNF Superfamily Signaling	35
rs3007420	chr1	6464089	TNFRSF25	DR3	TNF Superfamily Signaling	35
rs3007421	chr1	6464455	TNFRSF25	DR3	TNF Superfamily Signaling	35
rs863171	chr1	7926881	TNFRSF9	TNFRSF9	TNF Superfamily Signaling	35
rs226478	chr1	7930900	TNFRSF9	TNFRSF9	TNF Superfamily Signaling	35
rs226476	chr1	7933229	TNFRSF9	TNFRSF9	TNF Superfamily Signaling	35
rs6540985	chr1	9642954	PIK3CD	PI3K p110	PI3K/AKT Signaling	35
rs4240896	chr1	9647766	PIK3CD	PI3K p110	PI3K/AKT Signaling	35
rs12730387	chr1	9665603	PIK3CD	PI3K p110	PI3K/AKT Signaling	35
rs11802023	chr1	9667177	PIK3CD	PI3K p110	PI3K/AKT Signaling	35
rs11121472	chr1	9667487	PIK3CD	PI3K p110	PI3K/AKT Signaling	35
rs12568084	chr1	9668553	PIK3CD	PI3K p110	PI3K/AKT Signaling	35
rs4846192	chr1	9677995	PIK3CD	PI3K p110	PI3K/AKT Signaling	35
rs12566637	chr1	9694917	PIK3CD	PI3K p110	PI3K/AKT Signaling	35
rs6541017	chr1	9705830	PIK3CD	PI3K p110	PI3K/AKT Signaling	35
rs9430220	chr1	9714137	PIK3CD	PI3K p110	PI3K/AKT Signaling	35
rs12037599	chr1	9721111	PIK3CD	PI3K p110	PI3K/AKT Signaling	35
rs1135427	chr1	9722106	PIK3CD	PI3K p110	PI3K/AKT Signaling	35
rs6667629	chr1	10458733	DFFA	ICAD	Apoptosis Signaling	35
rs2781233	chr1	10463460	DFFA	ICAD	Apoptosis Signaling	35
rs11588734	chr1	10467247	DFFA	ICAD	Apoptosis Signaling	35
rs685746	chr1	10471703	DFFA	ICAD	Apoptosis Signaling	35
rs3765900	chr1	11038636	MASP2	MASP2	Complement Cascase	35
rs6540964	chr1	11100568	FRAP1	mTOR	PI3K/AKT Signaling	35
rs12732063	chr1	11125498	FRAP1	mTOR	PI3K/AKT Signaling	35
rs17417751	chr1	11133261	FRAP1	mTOR	PI3K/AKT Signaling	35
rs1770345	chr1	11148846	FRAP1	mTOR	PI3K/AKT Signaling	35
rs718206	chr1	11228740	FRAP1	mTOR	PI3K/AKT Signaling	35
rs1074078	chr1	11261054	FRAP1	mTOR	PI3K/AKT Signaling	35
rs496888	chr1	12167072	TNFRSF1B	TNF-R2	TNF Superfamily Signaling	35
rs976881	chr1	12168020	TNFRSF1B	TNF-R2	TNF Superfamily Signaling	35
rs5745984	chr1	12174681	TNFRSF1B	TNF-R2	TNF Superfamily Signaling	35
rs3766730	chr1	12174942	TNFRSF1B	TNF-R2	TNF Superfamily Signaling	35
rs816050	chr1	12176257	TNFRSF1B	TNF-R2	TNF Superfamily Signaling	35
rs474247	chr1	12180441	TNFRSF1B	TNF-R2	TNF Superfamily Signaling	35
rs1201157	chr1	12183297	TNFRSF1B	TNF-R2	TNF Superfamily Signaling	35
rs683240	chr1	12184095	TNFRSF1B	TNF-R2	TNF Superfamily Signaling	35
rs5746014	chr1	12185154	TNFRSF1B	TNF-R2	TNF Superfamily Signaling	35
rs5746016	chr1	12185245	TNFRSF1B	TNF-R2	TNF Superfamily Signaling	35
rs653667	chr1	12186074	TNFRSF1B	TNF-R2	TNF Superfamily Signaling	35
rs1061622	chr1	12187221	TNFRSF1B	TNF-R2	TNF Superfamily Signaling	35
rs5746026	chr1	12187328	TNFRSF1B	TNF-R2	TNF Superfamily Signaling	35
rs5746051	chr1	12196238	TNFRSF1B	TNF-R2	TNF Superfamily Signaling	35
rs235219	chr1	12198621	TNFRSF1B	TNF-R2	TNF Superfamily Signaling	35
rs1061624	chr1	12201531	TNFRSF1B	TNF-R2	TNF Superfamily Signaling	35
rs1061628	chr1	12202265	TNFRSF1B	TNF-R2	TNF Superfamily Signaling	35
rs1061631	chr1	12202765	TNFRSF1B	TNF-R2	TNF Superfamily Signaling	35
rs4646096	chr1	15566064	CASP9	Caspase 9	Apoptosis Signaling	35
rs4661636	chr1	15568367	CASP9	Caspase 9	Apoptosis Signaling	35
rs1052576	chr1	15577849	CASP9	Caspase 9	Apoptosis Signaling	35
rs2020902	chr1	15579666	CASP9	Caspase 9	Apoptosis Signaling	35
rs4233535	chr1	15590503	CASP9	Caspase 9	Apoptosis Signaling	35
rs876018	chr1	20047233	PLA2G2A	PLA3	Eicosanoid Signaling	35
rs955587	chr1	20048457	PLA2G2A	PLA3	Eicosanoid Signaling	35
rs4744	chr1	20050232	PLA2G2A	PLA3	Eicosanoid Signaling	35
rs3753827	chr1	20051193	PLA2G2A	PLA3	Eicosanoid Signaling	35
rs11573142	chr1	20052750	PLA2G2A	PLA3	Eicosanoid Signaling	35
rs10916685	chr1	20054871	PLA2G2A	PLA3	Eicosanoid Signaling	35
rs12059492	chr1	20182710	PLA2G2D	phospholipase A2 G2D	Eicosanoid Signaling	35
rs11576937	chr1	20182846	PLA2G2D	phospholipase A2 G2D	Eicosanoid Signaling	35
rs7518058	chr1	20182869	PLA2G2D	phospholipase A2 G2D	Eicosanoid Signaling	35
rs7515774	chr1	20182940	PLA2G2D	phospholipase A2 G2D	Eicosanoid Signaling	35
rs7551550	chr1	20183070	PLA2G2D	phospholipase A2 G2D	Eicosanoid Signaling	35
rs578459	chr1	20184828	PLA2G2D	phospholipase A2 G2D	Eicosanoid Signaling	35
rs10916711	chr1	20186939	PLA2G2D	phospholipase A2 G2D	Eicosanoid Signaling	35
rs584367	chr1	20187360	PLA2G2D	phospholipase A2 G2D	Eicosanoid Signaling	35
rs679667	chr1	20187859	PLA2G2D	phospholipase A2 G2D	Eicosanoid Signaling	35
rs3736979	chr1	20187997	PLA2G2D	phospholipase A2 G2D	Eicosanoid Signaling	35
rs1567102	chr1	20189779	PLA2G2D	phospholipase A2 G2D	Eicosanoid Signaling	35
rs17354769	chr1	20192707	PLA2G2D	phospholipase A2 G2D	Eicosanoid Signaling	35
rs829391	chr1	21666364	RAP1GAP	Rap1GAP	ERK/MAPK Signaling	35
rs7515277	chr1	21666931	RAP1GAP	Rap1GAP	ERK/MAPK Signaling	35
rs1049396	chr1	21668850	RAP1GAP	Rap1GAP	ERK/MAPK Signaling	35
rs2794278	chr1	21670414	RAP1GAP	Rap1GAP	ERK/MAPK Signaling	35
rs10917023	chr1	21670909	RAP1GAP	Rap1GAP	ERK/MAPK Signaling	35
rs1767444	chr1	21671804	RAP1GAP	Rap1GAP	ERK/MAPK Signaling	35
rs12759525	chr1	21673154	RAP1GAP	Rap1GAP	ERK/MAPK Signaling	35
rs2275366	chr1	21673650	RAP1GAP	Rap1GAP	ERK/MAPK Signaling	35
rs2275365	chr1	21677931	RAP1GAP	Rap1GAP	ERK/MAPK Signaling	35
rs829370	chr1	21678499	RAP1GAP	Rap1GAP	ERK/MAPK Signaling	35
rs861212	chr1	21680739	RAP1GAP	Rap1GAP	ERK/MAPK Signaling	35
rs12130950	chr1	21680773	RAP1GAP	Rap1GAP	ERK/MAPK Signaling	35
rs3817041	chr1	21681011	RAP1GAP	Rap1GAP	ERK/MAPK Signaling	35
rs9426672	chr1	21682215	RAP1GAP	Rap1GAP	ERK/MAPK Signaling	35
rs12083062	chr1	21682623	RAP1GAP	Rap1GAP	ERK/MAPK Signaling	35
rs2275364	chr1	21683681	RAP1GAP	Rap1GAP	ERK/MAPK Signaling	35
rs11586663	chr1	21684342	RAP1GAP	Rap1GAP	ERK/MAPK Signaling	35
rs2275363	chr1	21685861	RAP1GAP	Rap1GAP	ERK/MAPK Signaling	35
rs1825306	chr1	21687906	RAP1GAP	Rap1GAP	ERK/MAPK Signaling	35
rs829417	chr1	21688442	RAP1GAP	Rap1GAP	ERK/MAPK Signaling	35
rs829418	chr1	21688810	RAP1GAP	Rap1GAP	ERK/MAPK Signaling	35
rs2275360	chr1	21689126	RAP1GAP	Rap1GAP	ERK/MAPK Signaling	35
rs2275358	chr1	21689475	RAP1GAP	Rap1GAP	ERK/MAPK Signaling	35
rs863803	chr1	21691313	RAP1GAP	Rap1GAP	ERK/MAPK Signaling	35
rs12134357	chr1	21691702	RAP1GAP	Rap1GAP	ERK/MAPK Signaling	35
rs729648	chr1	21693026	RAP1GAP	Rap1GAP	ERK/MAPK Signaling	35
rs829412	chr1	21698742	RAP1GAP	Rap1GAP	ERK/MAPK Signaling	35
rs9426770	chr1	21701050	RAP1GAP	Rap1GAP	ERK/MAPK Signaling	35
rs11591167	chr1	21703842	RAP1GAP	Rap1GAP	ERK/MAPK Signaling	35
rs2316497	chr1	21704263	RAP1GAP	Rap1GAP	ERK/MAPK Signaling	35
rs1557087	chr1	21704321	RAP1GAP	Rap1GAP	ERK/MAPK Signaling	35
rs9426772	chr1	21704896	RAP1GAP	Rap1GAP	ERK/MAPK Signaling	35
rs12045276	chr1	21706887	RAP1GAP	Rap1GAP	ERK/MAPK Signaling	35
rs12142081	chr1	21712139	RAP1GAP	Rap1GAP	ERK/MAPK Signaling	35
rs7541798	chr1	21715595	RAP1GAP	Rap1GAP	ERK/MAPK Signaling	35
rs6426721	chr1	21717786	RAP1GAP	Rap1GAP	ERK/MAPK Signaling	35
rs4654975	chr1	21720140	RAP1GAP	Rap1GAP	ERK/MAPK Signaling	35
rs16825755	chr1	21720520	RAP1GAP	Rap1GAP	ERK/MAPK Signaling	35
rs2625408	chr1	21724536	RAP1GAP	Rap1GAP	ERK/MAPK Signaling	35
rs829374	chr1	21733928	RAP1GAP	Rap1GAP	ERK/MAPK Signaling	35
rs3753778	chr1	21738347	RAP1GAP	Rap1GAP	ERK/MAPK Signaling	35
rs829377	chr1	21738476	RAP1GAP	Rap1GAP	ERK/MAPK Signaling	35
rs829398	chr1	21742154	RAP1GAP	Rap1GAP	ERK/MAPK Signaling	35
rs829400	chr1	21744067	RAP1GAP	Rap1GAP	ERK/MAPK Signaling	35
rs12036106	chr1	21744144	RAP1GAP	Rap1GAP	ERK/MAPK Signaling	35
rs3818942	chr1	21745332	RAP1GAP	Rap1GAP	ERK/MAPK Signaling	35
rs829402	chr1	21745435	RAP1GAP	Rap1GAP	ERK/MAPK Signaling	35
rs665691	chr1	22705660	C1QA	C1q	Complement Cascase	35
rs2935542	chr1	22708777	C1QA	C1q	Complement Cascase	35
rs6690827	chr1	22712802	C1QA	C1q	Complement Cascase	35
rs12404537	chr1	22714674	C1QC	C1q	Complement Cascase	35
rs12073436	chr1	22716214	C1QC	C1q	Complement Cascase	35
rs672693	chr1	22716752	C1QC	C1q	Complement Cascase	35
rs11579200	chr1	22721833	C1QC	C1q	Complement Cascase	35
rs291985	chr1	22726245	C1QB	C1q	Complement Cascase	35
rs12756603	chr1	22727182	C1QB	C1q	Complement Cascase	35
rs629409	chr1	22732044	C1QB	C1q	Complement Cascase	35
rs12040131	chr1	22735004	C1QB	C1q	Complement Cascase	35
rs292010	chr1	22735051	C1QB	C1q	Complement Cascase	35
rs12092673	chr1	24189847	IL22RA1	interleukin 22 receptor, alpha 1	Cytokines	35
rs3795300	chr1	24192520	IL22RA1	interleukin 22 receptor, alpha 1	Cytokines	35
rs3795299	chr1	24192774	IL22RA1	interleukin 22 receptor, alpha 1	Cytokines	35
rs7355101	chr1	24196391	IL22RA1	interleukin 22 receptor, alpha 1	Cytokines	35
rs11249201	chr1	24197705	IL22RA1	interleukin 22 receptor, alpha 1	Cytokines	35
rs11578307	chr1	24198069	IL22RA1	interleukin 22 receptor, alpha 1	Cytokines	35
rs11577442	chr1	24198384	IL22RA1	interleukin 22 receptor, alpha 1	Cytokines	35
rs16829204	chr1	24199994	IL22RA1	interleukin 22 receptor, alpha 1	Cytokines	35
rs4649187	chr1	24203785	IL22RA1	interleukin 22 receptor, alpha 1	Cytokines	35
rs4486393	chr1	24208869	IL22RA1	interleukin 22 receptor, alpha 1	Cytokines	35
rs7367639	chr1	24211341	IL22RA1	interleukin 22 receptor, alpha 1	Cytokines	35
rs10751768	chr1	24211565	IL22RA1	interleukin 22 receptor, alpha 1	Cytokines	35
rs4448470	chr1	24216506	IL22RA1	interleukin 22 receptor, alpha 1	Cytokines	35
rs7546442	chr1	24216594	IL22RA1	interleukin 22 receptor, alpha 1	Cytokines	35
rs3936073	chr1	24217460	IL22RA1	interleukin 22 receptor, alpha 1	Cytokines	35
rs6424157	chr1	24219182	IL22RA1	interleukin 22 receptor, alpha 1	Cytokines	35
rs11247909	chr1	26324277	CD52	CD52,B7-Ag	B7 family	35
rs4659426	chr1	26328356	CD52	CD52,B7-Ag	B7 family	35
rs7416513	chr1	26332091	CD52	CD52,B7-Ag	B7 family	35
rs17162190	chr1	26556974	RPS6KA1	p90RSK	ERK/MAPK Signaling	35
rs4443935	chr1	26559575	RPS6KA1	p90RSK	ERK/MAPK Signaling	35
rs3816540	chr1	26567653	RPS6KA1	p90RSK	ERK/MAPK Signaling	35
rs3790645	chr1	26569006	RPS6KA1	p90RSK	ERK/MAPK Signaling	35
rs11577405	chr1	26577400	RPS6KA1	p90RSK	ERK/MAPK Signaling	35
rs190737	chr1	26583586	RPS6KA1	p90RSK	ERK/MAPK Signaling	35
rs2229714	chr1	26584850	RPS6KA1	p90RSK	ERK/MAPK Signaling	35
rs11113	chr1	26585232	RPS6KA1	p90RSK	ERK/MAPK Signaling	35
rs7726	chr1	26585461	RPS6KA1	p90RSK	ERK/MAPK Signaling	35
rs6666757	chr1	26586836	RPS6KA1	p90RSK	ERK/MAPK Signaling	35
rs11247639	chr1	27363834	MAP3K6	ASK2, MAP3K6	p38 MAPK Signaling	35
rs12742921	chr1	27366268	MAP3K6	ASK2, MAP3K6	p38 MAPK Signaling	35
rs17162549	chr1	27366672	MAP3K6	ASK2, MAP3K6	p38 MAPK Signaling	35
rs1138294	chr1	27372775	MAP3K6	ASK2, MAP3K6	p38 MAPK Signaling	35
rs4307592	chr1	27374501	MAP3K6	ASK2, MAP3K6	p38 MAPK Signaling	35
rs12727507	chr1	27374786	MAP3K6	ASK2, MAP3K6	p38 MAPK Signaling	35
rs313151	chr1	28162170	PTAFR	platelet-activating factor receptor	Miscellaneous	35
rs6673481	chr1	28810886	GMEB1	glucocorticoid modulatory element binding protein 1	Glucocorticoid signaling	35
rs12130117	chr1	28811269	GMEB1	glucocorticoid modulatory element binding protein 1	Glucocorticoid signaling	35
rs12082843	chr1	28823976	GMEB1	glucocorticoid modulatory element binding protein 1	Glucocorticoid signaling	35
rs9426394	chr1	28828345	GMEB1	glucocorticoid modulatory element binding protein 1	Glucocorticoid signaling	35
rs4233253	chr1	28853372	GMEB1	glucocorticoid modulatory element binding protein 1	Glucocorticoid signaling	35
rs2503011	chr1	29379084	PTPRU	Protein tyrosine phosphatase receptor type U	Phosphatase	35
rs2503006	chr1	29382686	PTPRU	Protein tyrosine phosphatase receptor type U	Phosphatase	35
rs7349137	chr1	29389828	PTPRU	Protein tyrosine phosphatase receptor type U	Phosphatase	35
rs1032425	chr1	29396221	PTPRU	Protein tyrosine phosphatase receptor type U	Phosphatase	35
rs2131556	chr1	29400442	PTPRU	Protein tyrosine phosphatase receptor type U	Phosphatase	35
rs16838061	chr1	29401706	PTPRU	Protein tyrosine phosphatase receptor type U	Phosphatase	35
rs10915247	chr1	29419600	PTPRU	Protein tyrosine phosphatase receptor type U	Phosphatase	35
rs6690023	chr1	29420572	PTPRU	Protein tyrosine phosphatase receptor type U	Phosphatase	35
rs4428852	chr1	29427895	PTPRU	Protein tyrosine phosphatase receptor type U	Phosphatase	35
rs2076620	chr1	29436934	PTPRU	Protein tyrosine phosphatase receptor type U	Phosphatase	35
rs2073173	chr1	29439394	PTPRU	Protein tyrosine phosphatase receptor type U	Phosphatase	35
rs7518159	chr1	29442076	PTPRU	Protein tyrosine phosphatase receptor type U	Phosphatase	35
rs9426315	chr1	29445991	PTPRU	Protein tyrosine phosphatase receptor type U	Phosphatase	35
rs3737606	chr1	29451572	PTPRU	Protein tyrosine phosphatase receptor type U	Phosphatase	35
rs2235937	chr1	29452525	PTPRU	Protein tyrosine phosphatase receptor type U	Phosphatase	35
rs2235936	chr1	29453016	PTPRU	Protein tyrosine phosphatase receptor type U	Phosphatase	35
rs2235938	chr1	29453216	PTPRU	Protein tyrosine phosphatase receptor type U	Phosphatase	35
rs2179795	chr1	29462934	PTPRU	Protein tyrosine phosphatase receptor type U	Phosphatase	35
rs1997865	chr1	29464497	PTPRU	Protein tyrosine phosphatase receptor type U	Phosphatase	35
rs16834926	chr1	32333959	TXLNA	interleukin 14, taxilin alpha	Cytokines	35
rs10914539	chr1	32384734	LCK	LCK	Lymphocyte signaling	35
rs1004420	chr1	32398795	LCK	LCK	Lymphocyte signaling	35
rs695161	chr1	32412959	LCK	LCK	Lymphocyte signaling	35
rs1741981	chr1	32425532	HDAC1	HDAC1/2	NF-&kappa;B Signaling	35
rs2275473	chr1	36598766	CSF3R	G-CSF Receptor	Cytokines	35
rs3918003	chr1	36600466	CSF3R	G-CSF Receptor	Cytokines	35
rs3917991	chr1	36603898	CSF3R	G-CSF Receptor	Cytokines	35
rs3918020	chr1	36604501	CSF3R	G-CSF Receptor	Cytokines	35
rs3917974	chr1	36606794	CSF3R	G-CSF Receptor	Cytokines	35
rs3918018	chr1	36606971	CSF3R	G-CSF Receptor	Cytokines	35
rs3917971	chr1	36607757	CSF3R	G-CSF Receptor	Cytokines	35
rs3917960	chr1	36609667	CSF3R	G-CSF Receptor	Cytokines	35
rs3917950	chr1	36610844	CSF3R	G-CSF Receptor	Cytokines	35
rs3917924	chr1	36614746	CSF3R	G-CSF Receptor	Cytokines	35
rs4026505	chr1	36619868	CSF3R	G-CSF Receptor	Cytokines	35
rs6662501	chr1	36621528	CSF3R	G-CSF Receptor	Cytokines	35
rs2065708	chr1	45646778	PRDX1	peroxiredoxin 1	ROS/Glutathione	35
rs11211129	chr1	45652173	PRDX1	peroxiredoxin 1	ROS/Glutathione	35
rs713358	chr1	45657360	PRDX1	peroxiredoxin 1	ROS/Glutathione	35
rs7522705	chr1	45661393	PRDX1	peroxiredoxin 1	ROS/Glutathione	35
rs785467	chr1	46233579	PIK3R3	PI3K p85	PI3K/AKT Signaling	35
rs785512	chr1	46246563	PIK3R3	PI3K p85	PI3K/AKT Signaling	35
rs809775	chr1	46250060	PIK3R3	PI3K p85	PI3K/AKT Signaling	35
rs12143865	chr1	46260182	PIK3R3	PI3K p85	PI3K/AKT Signaling	35
rs9429187	chr1	46270947	PIK3R3	PI3K p85	PI3K/AKT Signaling	35
rs785505	chr1	46307635	PIK3R3	PI3K p85	PI3K/AKT Signaling	35
rs1416706	chr1	46314864	PIK3R3	PI3K p85	PI3K/AKT Signaling	35
rs2146562	chr1	46733465	MKNK1	MNK1	ERK/MAPK Signaling	35
rs8602	chr1	46735551	MKNK1	MNK1	ERK/MAPK Signaling	35
rs1054743	chr1	46747663	MKNK1	MNK1	ERK/MAPK Signaling	35
rs3766240	chr1	46748010	MKNK1	MNK1	ERK/MAPK Signaling	35
rs2297850	chr1	46754632	MKNK1	MNK1	ERK/MAPK Signaling	35
rs1060478	chr1	46762353	MKNK1	MNK1	ERK/MAPK Signaling	35
rs1258012	chr1	46784164	MKNK1	MNK1	ERK/MAPK Signaling	35
rs2181413	chr1	46786482	MKNK1	MNK1	ERK/MAPK Signaling	35
rs4381241	chr1	50619459	FAF1	Fas (TNFRSF6) associated factor 1	Glucocorticoid signaling	35
rs17106184	chr1	50622006	FAF1	Fas (TNFRSF6) associated factor 1	Glucocorticoid signaling	35
rs17382478	chr1	50642285	FAF1	Fas (TNFRSF6) associated factor 1	Glucocorticoid signaling	35
rs3827730	chr1	50649869	FAF1	Fas (TNFRSF6) associated factor 1	Glucocorticoid signaling	35
rs12116432	chr1	50661745	FAF1	Fas (TNFRSF6) associated factor 1	Glucocorticoid signaling	35
rs3862271	chr1	50667017	FAF1	Fas (TNFRSF6) associated factor 1	Glucocorticoid signaling	35
rs1149790	chr1	50669530	FAF1	Fas (TNFRSF6) associated factor 1	Glucocorticoid signaling	35
rs17387024	chr1	50705199	FAF1	Fas (TNFRSF6) associated factor 1	Glucocorticoid signaling	35
rs12083078	chr1	50778971	FAF1	Fas (TNFRSF6) associated factor 1	Glucocorticoid signaling	35
rs12120719	chr1	50804850	FAF1	Fas (TNFRSF6) associated factor 1	Glucocorticoid signaling	35
rs12746642	chr1	50831790	FAF1	Fas (TNFRSF6) associated factor 1	Glucocorticoid signaling	35
rs11585301	chr1	50833060	FAF1	Fas (TNFRSF6) associated factor 1	Glucocorticoid signaling	35
rs17384367	chr1	50854577	FAF1	Fas (TNFRSF6) associated factor 1	Glucocorticoid signaling	35
rs12726772	chr1	50880913	FAF1	Fas (TNFRSF6) associated factor 1	Glucocorticoid signaling	35
rs11205760	chr1	50886351	FAF1	Fas (TNFRSF6) associated factor 1	Glucocorticoid signaling	35
rs17384533	chr1	50892681	FAF1	Fas (TNFRSF6) associated factor 1	Glucocorticoid signaling	35
rs11205761	chr1	50895278	FAF1	Fas (TNFRSF6) associated factor 1	Glucocorticoid signaling	35
rs6672112	chr1	50900615	FAF1	Fas (TNFRSF6) associated factor 1	Glucocorticoid signaling	35
rs11588333	chr1	50948613	FAF1	Fas (TNFRSF6) associated factor 1	Glucocorticoid signaling	35
rs12075991	chr1	50964639	FAF1	Fas (TNFRSF6) associated factor 1	Glucocorticoid signaling	35
rs17391220	chr1	51005484	FAF1	Fas (TNFRSF6) associated factor 1	Glucocorticoid signaling	35
rs3747997	chr1	51024640	FAF1	Fas (TNFRSF6) associated factor 1	Glucocorticoid signaling	35
rs6695869	chr1	51125226	FAF1	Fas (TNFRSF6) associated factor 1	Glucocorticoid signaling	35
rs706470	chr1	57027791	C8A	C8A	Complement Cascase	35
rs1033729	chr1	57028289	C8A	C8A	Complement Cascase	35
rs636879	chr1	57036443	C8A	C8A	Complement Cascase	35
rs2405237	chr1	57052567	C8A	C8A	Complement Cascase	35
rs652785	chr1	57052748	C8A	C8A	Complement Cascase	35
rs2300955	chr1	57056183	C8A	C8A	Complement Cascase	35
rs6697228	chr1	57061485	C8A	C8A	Complement Cascase	35
rs6699859	chr1	57072471	C8A	C8A	Complement Cascase	35
rs1360151	chr1	57076062	C8A	C8A	Complement Cascase	35
rs592451	chr1	57082456	C8A	C8A	Complement Cascase	35
rs624298	chr1	57086555	C8A	C8A	Complement Cascase	35
rs1774900	chr1	57089170	C8A	C8A	Complement Cascase	35
rs638919	chr1	57089193	C8A	C8A	Complement Cascase	35
rs635833	chr1	57089831	C8A	C8A	Complement Cascase	35
rs1342440	chr1	57095336	C8A	C8A	Complement Cascase	35
rs17301146	chr1	57112282	C8B	C8B	Complement Cascase	35
rs17301153	chr1	57113005	C8B	C8B	Complement Cascase	35
rs594661	chr1	57114003	C8B	C8B	Complement Cascase	35
rs669358	chr1	57116760	C8B	C8B	Complement Cascase	35
rs725330	chr1	57117742	C8B	C8B	Complement Cascase	35
rs626457	chr1	57119505	C8B	C8B	Complement Cascase	35
rs582317	chr1	57125789	C8B	C8B	Complement Cascase	35
rs658285	chr1	57128356	C8B	C8B	Complement Cascase	35
rs1013579	chr1	57134505	C8B	C8B	Complement Cascase	35
rs683916	chr1	57137495	C8B	C8B	Complement Cascase	35
rs2236217	chr1	57142826	C8B	C8B	Complement Cascase	35
rs1984266	chr1	57145116	C8B	C8B	Complement Cascase	35
rs997768	chr1	58956940	JUN	c-Jun	Toll-like Receptor Signaling	35
rs11688	chr1	58960014	JUN	c-Jun	Toll-like Receptor Signaling	35
rs2984915	chr1	58965716	JUN	c-Jun	Toll-like Receptor Signaling	35
rs2780890	chr1	65013511	JAK1	JAK1	JAK/Stat Signaling	35
rs2780816	chr1	65014434	JAK1	JAK1	JAK/Stat Signaling	35
rs4916004	chr1	65015531	JAK1	JAK1	JAK/Stat Signaling	35
rs17390055	chr1	65016974	JAK1	JAK1	JAK/Stat Signaling	35
rs310244	chr1	65017898	JAK1	JAK1	JAK/Stat Signaling	35
rs310245	chr1	65018203	JAK1	JAK1	JAK/Stat Signaling	35
rs10789166	chr1	65024834	JAK1	JAK1	JAK/Stat Signaling	35
rs310224	chr1	65037991	JAK1	JAK1	JAK/Stat Signaling	35
rs2256298	chr1	65042703	JAK1	JAK1	JAK/Stat Signaling	35
rs2780885	chr1	65043393	JAK1	JAK1	JAK/Stat Signaling	35
rs12093269	chr1	65043807	JAK1	JAK1	JAK/Stat Signaling	35
rs17127114	chr1	65047852	JAK1	JAK1	JAK/Stat Signaling	35
rs2027053	chr1	65049723	JAK1	JAK1	JAK/Stat Signaling	35
rs3790541	chr1	65053588	JAK1	JAK1	JAK/Stat Signaling	35
rs310202	chr1	65061565	JAK1	JAK1	JAK/Stat Signaling	35
rs4385675	chr1	65966105	PDE4B	PDE	G-Protein Coupled Receptor Signaling	35
rs12034009	chr1	65967246	PDE4B	PDE	G-Protein Coupled Receptor Signaling	35
rs12744733	chr1	65980229	PDE4B	PDE	G-Protein Coupled Receptor Signaling	35
rs11208756	chr1	65981332	PDE4B	PDE	G-Protein Coupled Receptor Signaling	35
rs4655589	chr1	65983807	PDE4B	PDE	G-Protein Coupled Receptor Signaling	35
rs4542192	chr1	65984562	PDE4B	PDE	G-Protein Coupled Receptor Signaling	35
rs4288570	chr1	65989006	PDE4B	PDE	G-Protein Coupled Receptor Signaling	35
rs4384209	chr1	65991146	PDE4B	PDE	G-Protein Coupled Receptor Signaling	35
rs11208758	chr1	65999221	PDE4B	PDE	G-Protein Coupled Receptor Signaling	35
rs11576180	chr1	66004727	PDE4B	PDE	G-Protein Coupled Receptor Signaling	35
rs12760107	chr1	66016665	PDE4B	PDE	G-Protein Coupled Receptor Signaling	35
rs6704418	chr1	66029568	PDE4B	PDE	G-Protein Coupled Receptor Signaling	35
rs12751825	chr1	66036415	PDE4B	PDE	G-Protein Coupled Receptor Signaling	35
rs12134350	chr1	66042615	PDE4B	PDE	G-Protein Coupled Receptor Signaling	35
rs2801578	chr1	66044676	PDE4B	PDE	G-Protein Coupled Receptor Signaling	35
rs2186124	chr1	66044916	PDE4B	PDE	G-Protein Coupled Receptor Signaling	35
rs1316871	chr1	66051069	PDE4B	PDE	G-Protein Coupled Receptor Signaling	35
rs12760605	chr1	66053785	PDE4B	PDE	G-Protein Coupled Receptor Signaling	35
rs11586637	chr1	66064011	PDE4B	PDE	G-Protein Coupled Receptor Signaling	35
rs4353064	chr1	66069696	PDE4B	PDE	G-Protein Coupled Receptor Signaling	35
rs6588174	chr1	66079212	PDE4B	PDE	G-Protein Coupled Receptor Signaling	35
rs17451216	chr1	66089667	PDE4B	PDE	G-Protein Coupled Receptor Signaling	35
rs17417507	chr1	66098137	PDE4B	PDE	G-Protein Coupled Receptor Signaling	35
rs17451451	chr1	66100174	PDE4B	PDE	G-Protein Coupled Receptor Signaling	35
rs7552762	chr1	66102192	PDE4B	PDE	G-Protein Coupled Receptor Signaling	35
rs2997091	chr1	66111656	PDE4B	PDE	G-Protein Coupled Receptor Signaling	35
rs11208775	chr1	66122562	PDE4B	PDE	G-Protein Coupled Receptor Signaling	35
rs1937458	chr1	66128330	PDE4B	PDE	G-Protein Coupled Receptor Signaling	35
rs17452121	chr1	66148696	PDE4B	PDE	G-Protein Coupled Receptor Signaling	35
rs12085651	chr1	66152574	PDE4B	PDE	G-Protein Coupled Receptor Signaling	35
rs1937457	chr1	66158808	PDE4B	PDE	G-Protein Coupled Receptor Signaling	35
rs2503187	chr1	66173138	PDE4B	PDE	G-Protein Coupled Receptor Signaling	35
rs1937451	chr1	66190665	PDE4B	PDE	G-Protein Coupled Receptor Signaling	35
rs1392816	chr1	66193209	PDE4B	PDE	G-Protein Coupled Receptor Signaling	35
rs17419964	chr1	66194474	PDE4B	PDE	G-Protein Coupled Receptor Signaling	35
rs2503215	chr1	66202034	PDE4B	PDE	G-Protein Coupled Receptor Signaling	35
rs2455031	chr1	66204649	PDE4B	PDE	G-Protein Coupled Receptor Signaling	35
rs9436312	chr1	66208160	PDE4B	PDE	G-Protein Coupled Receptor Signaling	35
rs2503220	chr1	66211578	PDE4B	PDE	G-Protein Coupled Receptor Signaling	35
rs7517992	chr1	66216678	PDE4B	PDE	G-Protein Coupled Receptor Signaling	35
rs6588184	chr1	66236778	PDE4B	PDE	G-Protein Coupled Receptor Signaling	35
rs7512880	chr1	66239922	PDE4B	PDE	G-Protein Coupled Receptor Signaling	35
rs6588185	chr1	66244749	PDE4B	PDE	G-Protein Coupled Receptor Signaling	35
rs1392815	chr1	66256978	PDE4B	PDE	G-Protein Coupled Receptor Signaling	35
rs17421629	chr1	66285621	PDE4B	PDE	G-Protein Coupled Receptor Signaling	35
rs4004	chr1	66289623	PDE4B	PDE	G-Protein Coupled Receptor Signaling	35
rs650440	chr1	66292964	PDE4B	PDE	G-Protein Coupled Receptor Signaling	35
rs566005	chr1	66295283	PDE4B	PDE	G-Protein Coupled Receptor Signaling	35
rs17421832	chr1	66297983	PDE4B	PDE	G-Protein Coupled Receptor Signaling	35
rs17421942	chr1	66300050	PDE4B	PDE	G-Protein Coupled Receptor Signaling	35
rs614350	chr1	66304021	PDE4B	PDE	G-Protein Coupled Receptor Signaling	35
rs2503170	chr1	66308903	PDE4B	PDE	G-Protein Coupled Receptor Signaling	35
rs599235	chr1	66338394	PDE4B	PDE	G-Protein Coupled Receptor Signaling	35
rs556303	chr1	66347816	PDE4B	PDE	G-Protein Coupled Receptor Signaling	35
rs17128482	chr1	66353700	PDE4B	PDE	G-Protein Coupled Receptor Signaling	35
rs6701547	chr1	66356704	PDE4B	PDE	G-Protein Coupled Receptor Signaling	35
rs583018	chr1	66358207	PDE4B	PDE	G-Protein Coupled Receptor Signaling	35
rs524897	chr1	66360924	PDE4B	PDE	G-Protein Coupled Receptor Signaling	35
rs4655821	chr1	66362068	PDE4B	PDE	G-Protein Coupled Receptor Signaling	35
rs17423910	chr1	66401130	PDE4B	PDE	G-Protein Coupled Receptor Signaling	35
rs7528545	chr1	66404785	PDE4B	PDE	G-Protein Coupled Receptor Signaling	35
rs6692281	chr1	66406679	PDE4B	PDE	G-Protein Coupled Receptor Signaling	35
rs12731764	chr1	66409774	PDE4B	PDE	G-Protein Coupled Receptor Signaling	35
rs17424885	chr1	66424143	PDE4B	PDE	G-Protein Coupled Receptor Signaling	35
rs6664618	chr1	66426605	PDE4B	PDE	G-Protein Coupled Receptor Signaling	35
rs1572680	chr1	66448046	PDE4B	PDE	G-Protein Coupled Receptor Signaling	35
rs499320	chr1	66457081	PDE4B	PDE	G-Protein Coupled Receptor Signaling	35
rs12060491	chr1	66457373	PDE4B	PDE	G-Protein Coupled Receptor Signaling	35
rs522037	chr1	66463922	PDE4B	PDE	G-Protein Coupled Receptor Signaling	35
rs17460284	chr1	66468572	PDE4B	PDE	G-Protein Coupled Receptor Signaling	35
rs599381	chr1	66472581	PDE4B	PDE	G-Protein Coupled Receptor Signaling	35
rs782689	chr1	66476973	PDE4B	PDE	G-Protein Coupled Receptor Signaling	35
rs1040716	chr1	66489611	PDE4B	PDE	G-Protein Coupled Receptor Signaling	35
rs11803904	chr1	66493565	PDE4B	PDE	G-Protein Coupled Receptor Signaling	35
rs12142015	chr1	66493917	PDE4B	PDE	G-Protein Coupled Receptor Signaling	35
rs6667596	chr1	66498021	PDE4B	PDE	G-Protein Coupled Receptor Signaling	35
rs1040715	chr1	66502269	PDE4B	PDE	G-Protein Coupled Receptor Signaling	35
rs1890197	chr1	66514793	PDE4B	PDE	G-Protein Coupled Receptor Signaling	35
rs17427907	chr1	66517291	PDE4B	PDE	G-Protein Coupled Receptor Signaling	35
rs1321177	chr1	66527092	PDE4B	PDE	G-Protein Coupled Receptor Signaling	35
rs598961	chr1	66531644	PDE4B	PDE	G-Protein Coupled Receptor Signaling	35
rs2144719	chr1	66535155	PDE4B	PDE	G-Protein Coupled Receptor Signaling	35
rs783037	chr1	66542128	PDE4B	PDE	G-Protein Coupled Receptor Signaling	35
rs783036	chr1	66543391	PDE4B	PDE	G-Protein Coupled Receptor Signaling	35
rs783068	chr1	66549880	PDE4B	PDE	G-Protein Coupled Receptor Signaling	35
rs783066	chr1	66553201	PDE4B	PDE	G-Protein Coupled Receptor Signaling	35
rs12041056	chr1	67339281	IL23R	interleukin 23 receptor	Cytokines	35
rs1884444	chr1	67345833	IL23R	interleukin 23 receptor	Cytokines	35
rs11465770	chr1	67345984	IL23R	interleukin 23 receptor	Cytokines	35
rs11465791	chr1	67361517	IL23R	interleukin 23 receptor	Cytokines	35
rs2064689	chr1	67365031	IL23R	interleukin 23 receptor	Cytokines	35
rs4655690	chr1	67371917	IL23R	interleukin 23 receptor	Cytokines	35
rs6656929	chr1	67373062	IL23R	interleukin 23 receptor	Cytokines	35
rs1569922	chr1	67376984	IL23R	interleukin 23 receptor	Cytokines	35
rs7539625	chr1	67384786	IL23R	interleukin 23 receptor	Cytokines	35
rs790634	chr1	67392949	IL23R	interleukin 23 receptor	Cytokines	35
rs7517847	chr1	67393690	IL23R	interleukin 23 receptor	Cytokines	35
rs2863212	chr1	67397137	IL23R	interleukin 23 receptor	Cytokines	35
rs7530511	chr1	67397408	IL23R	interleukin 23 receptor	Cytokines	35
rs10489629	chr1	67400370	IL23R	interleukin 23 receptor	Cytokines	35
rs4655692	chr1	67403686	IL23R	interleukin 23 receptor	Cytokines	35
rs2201841	chr1	67406223	IL23R	interleukin 23 receptor	Cytokines	35
rs12070470	chr1	67409292	IL23R	interleukin 23 receptor	Cytokines	35
rs11804284	chr1	67411275	IL23R	interleukin 23 receptor	Cytokines	35
rs10489628	chr1	67416128	IL23R	interleukin 23 receptor	Cytokines	35
rs1343152	chr1	67416353	IL23R	interleukin 23 receptor	Cytokines	35
rs10789229	chr1	67417595	IL23R	interleukin 23 receptor	Cytokines	35
rs11209026	chr1	67417979	IL23R	interleukin 23 receptor	Cytokines	35
rs1343151	chr1	67431150	IL23R	interleukin 23 receptor	Cytokines	35
rs1008193	chr1	67431932	IL23R	interleukin 23 receptor	Cytokines	35
rs6693831	chr1	67432888	IL23R	interleukin 23 receptor	Cytokines	35
rs10889675	chr1	67434237	IL23R	interleukin 23 receptor	Cytokines	35
rs10889680	chr1	67480614	IL12RB2	IL12Rbeta2	Cytokines	35
rs12131065	chr1	67481027	IL12RB2	IL12Rbeta2	Cytokines	35
rs3790558	chr1	67489042	IL12RB2	IL12Rbeta2	Cytokines	35
rs10489627	chr1	67491697	IL12RB2	IL12Rbeta2	Cytokines	35
rs2066446	chr1	67493138	IL12RB2	IL12Rbeta2	Cytokines	35
rs2201584	chr1	67499736	IL12RB2	IL12Rbeta2	Cytokines	35
rs17129789	chr1	67502619	IL12RB2	IL12Rbeta2	Cytokines	35
rs3790565	chr1	67523377	IL12RB2	IL12Rbeta2	Cytokines	35
rs3790567	chr1	67534398	IL12RB2	IL12Rbeta2	Cytokines	35
rs12564159	chr1	67543315	IL12RB2	IL12Rbeta2	Cytokines	35
rs2307145	chr1	67545548	IL12RB2	IL12Rbeta2	Cytokines	35
rs3828069	chr1	67551594	IL12RB2	IL12Rbeta2	Cytokines	35
rs2270614	chr1	67568042	IL12RB2	IL12Rbeta2	Cytokines	35
rs7555183	chr1	67572648	IL12RB2	IL12Rbeta2	Cytokines	35
rs5673	chr1	71189862	PTGER3	PTGER3	Eicosanoid Signaling	35
rs2268062	chr1	71197320	PTGER3	PTGER3	Eicosanoid Signaling	35
rs11209736	chr1	71204746	PTGER3	PTGER3	Eicosanoid Signaling	35
rs8179390	chr1	71206386	PTGER3	PTGER3	Eicosanoid Signaling	35
rs2300177	chr1	71210383	PTGER3	PTGER3	Eicosanoid Signaling	35
rs2744901	chr1	71218368	PTGER3	PTGER3	Eicosanoid Signaling	35
rs3766354	chr1	78669571	PTGFR	PTGFR	Eicosanoid Signaling	35
rs1555541	chr1	78673606	PTGFR	PTGFR	Eicosanoid Signaling	35
rs10489787	chr1	78673672	PTGFR	PTGFR	Eicosanoid Signaling	35
rs6701594	chr1	78688591	PTGFR	PTGFR	Eicosanoid Signaling	35
rs668005	chr1	78704838	PTGFR	PTGFR	Eicosanoid Signaling	35
rs3766333	chr1	78711817	PTGFR	PTGFR	Eicosanoid Signaling	35
rs4650581	chr1	78712224	PTGFR	PTGFR	Eicosanoid Signaling	35
rs12060353	chr1	78713941	PTGFR	PTGFR	Eicosanoid Signaling	35
rs12734711	chr1	84319995	PRKACB	PKA catalytic subunit beta	G-Protein Coupled Receptor Signaling	35
rs12129674	chr1	84325280	PRKACB	PKA catalytic subunit beta	G-Protein Coupled Receptor Signaling	35
rs12129768	chr1	84340676	PRKACB	PKA catalytic subunit beta	G-Protein Coupled Receptor Signaling	35
rs7524898	chr1	84344866	PRKACB	PKA catalytic subunit beta	G-Protein Coupled Receptor Signaling	35
rs2812447	chr1	84355904	PRKACB	PKA catalytic subunit beta	G-Protein Coupled Receptor Signaling	35
rs589373	chr1	84360606	PRKACB	PKA catalytic subunit beta	G-Protein Coupled Receptor Signaling	35
rs6695851	chr1	84366160	PRKACB	PKA catalytic subunit beta	G-Protein Coupled Receptor Signaling	35
rs7547892	chr1	84370612	PRKACB	PKA catalytic subunit beta	G-Protein Coupled Receptor Signaling	35
rs603939	chr1	84379473	PRKACB	PKA catalytic subunit beta	G-Protein Coupled Receptor Signaling	35
rs12039822	chr1	84401811	PRKACB	PKA catalytic subunit beta	G-Protein Coupled Receptor Signaling	35
rs12070215	chr1	84404731	PRKACB	PKA catalytic subunit beta	G-Protein Coupled Receptor Signaling	35
rs2389717	chr1	84406263	PRKACB	PKA catalytic subunit beta	G-Protein Coupled Receptor Signaling	35
rs787858	chr1	84417502	PRKACB	PKA catalytic subunit beta	G-Protein Coupled Receptor Signaling	35
rs962409	chr1	85444962	BCL10	BCL10	CARD	35
rs3768235	chr1	85445395	BCL10	BCL10	CARD	35
rs12024371	chr1	85450206	BCL10	BCL10	CARD	35
rs12134420	chr1	85450329	BCL10	BCL10	CARD	35
rs11161581	chr1	85450416	BCL10	BCL10	CARD	35
rs4949927	chr1	85452045	BCL10	BCL10	CARD	35
rs2735594	chr1	85453942	BCL10	BCL10	CARD	35
rs11576939	chr1	85454033	BCL10	BCL10	CARD	35
rs2735591	chr1	85456493	BCL10	BCL10	CARD	35
rs12240047	chr1	100893363	VCAM1	VCAM1	Adhesion	35
rs1409419	chr1	100895417	VCAM1	VCAM1	Adhesion	35
rs3176860	chr1	100899240	VCAM1	VCAM1	Adhesion	35
rs3176863	chr1	100900213	VCAM1	VCAM1	Adhesion	35
rs3917009	chr1	100901431	VCAM1	VCAM1	Adhesion	35
rs3176864	chr1	100901480	VCAM1	VCAM1	Adhesion	35
rs3917012	chr1	100907680	VCAM1	VCAM1	Adhesion	35
rs3176869	chr1	100908454	VCAM1	VCAM1	Adhesion	35
rs3181088	chr1	100910729	VCAM1	VCAM1	Adhesion	35
rs2209627	chr1	100911168	VCAM1	VCAM1	Adhesion	35
rs3176874	chr1	100911907	VCAM1	VCAM1	Adhesion	35
rs3917018	chr1	100914243	VCAM1	VCAM1	Adhesion	35
rs1999713	chr1	110162219	CSF1	M-CSF	Cytokines	35
rs333968	chr1	110172562	CSF1	M-CSF	Cytokines	35
rs333970	chr1	110178380	CSF1	M-CSF	Cytokines	35
rs3738760	chr1	110178852	CSF1	M-CSF	Cytokines	35
rs333948	chr1	110182634	CSF1	M-CSF	Cytokines	35
rs3093037	chr1	110183948	CSF1	M-CSF	Cytokines	35
rs17661447	chr1	110186035	CSF1	M-CSF	Cytokines	35
rs7513168	chr1	111124954	CD53	CD53	Lymphocyte signaling	35
rs12240031	chr1	111125324	CD53	CD53	Lymphocyte signaling	35
rs12143231	chr1	111125652	CD53	CD53	Lymphocyte signaling	35
rs10494122	chr1	111129141	CD53	CD53	Lymphocyte signaling	35
rs1389722	chr1	111130259	CD53	CD53	Lymphocyte signaling	35
rs1353221	chr1	111132436	CD53	CD53	Lymphocyte signaling	35
rs10857833	chr1	111133469	CD53	CD53	Lymphocyte signaling	35
rs10857834	chr1	111133754	CD53	CD53	Lymphocyte signaling	35
rs1494320	chr1	111134230	CD53	CD53	Lymphocyte signaling	35
rs4839581	chr1	111143130	CD53	CD53	Lymphocyte signaling	35
rs1343817	chr1	111149171	CD53	CD53	Lymphocyte signaling	35
rs12030938	chr1	111153900	CD53	CD53	Lymphocyte signaling	35
rs11807524	chr1	111160102	CD53	CD53	Lymphocyte signaling	35
rs12564752	chr1	111160693	CD53	CD53	Lymphocyte signaling	35
rs7521468	chr1	111162041	CD53	CD53	Lymphocyte signaling	35
rs1282020	chr1	111169529	CD53	CD53	Lymphocyte signaling	35
rs7547322	chr1	111171336	CD53	CD53	Lymphocyte signaling	35
rs1712672	chr1	111179422	CD53	CD53	Lymphocyte signaling	35
rs1418425	chr1	111180928	CD53	CD53	Lymphocyte signaling	35
rs11578728	chr1	111196844	CD53	CD53	Lymphocyte signaling	35
rs2232041	chr1	111206236	CD53	CD53	Lymphocyte signaling	35
rs1361724	chr1	111212318	CD53	CD53	Lymphocyte signaling	35
rs6696299	chr1	111217636	CD53	CD53	Lymphocyte signaling	35
rs6687647	chr1	111236535	CD53	CD53	Lymphocyte signaling	35
rs3393	chr1	111754191	ADORA3		G-Protein Coupled Receptor Signaling	35
rs1415793	chr1	111754278	ADORA3		G-Protein Coupled Receptor Signaling	35
rs12127443	chr1	111757505	ADORA3		G-Protein Coupled Receptor Signaling	35
rs10776728	chr1	111759162	ADORA3		G-Protein Coupled Receptor Signaling	35
rs2298191	chr1	111760306	ADORA3		G-Protein Coupled Receptor Signaling	35
rs3904831	chr1	111881854	RAP1A	Rap1a	ERK/MAPK Signaling	35
rs491053	chr1	111898183	RAP1A	Rap1a	ERK/MAPK Signaling	35
rs494453	chr1	111904164	RAP1A	Rap1a	ERK/MAPK Signaling	35
rs474077	chr1	111907256	RAP1A	Rap1a	ERK/MAPK Signaling	35
rs501923	chr1	111908781	RAP1A	Rap1a	ERK/MAPK Signaling	35
rs511584	chr1	111911327	RAP1A	Rap1a	ERK/MAPK Signaling	35
rs11576942	chr1	111915227	RAP1A	Rap1a	ERK/MAPK Signaling	35
rs2477429	chr1	111918471	RAP1A	Rap1a	ERK/MAPK Signaling	35
rs7525578	chr1	111929003	RAP1A	Rap1a	ERK/MAPK Signaling	35
rs484495	chr1	111948344	RAP1A	Rap1a	ERK/MAPK Signaling	35
rs1886498	chr1	111949080	RAP1A	Rap1a	ERK/MAPK Signaling	35
rs12751967	chr1	111955989	RAP1A	Rap1a	ERK/MAPK Signaling	35
rs1811842	chr1	111959488	RAP1A	Rap1a	ERK/MAPK Signaling	35
rs1217395	chr1	114086477	PTPN22	PTPN22	Lymphocyte signaling	35
rs1970559	chr1	114089190	PTPN22	PTPN22	Lymphocyte signaling	35
rs2476601	chr1	114089610	PTPN22	PTPN22	Lymphocyte signaling	35
rs12760457	chr1	114101790	PTPN22	PTPN22	Lymphocyte signaling	35
rs3765598	chr1	114106505	PTPN22	PTPN22	Lymphocyte signaling	35
rs1217418	chr1	114113273	PTPN22	PTPN22	Lymphocyte signaling	35
rs1217414	chr1	114124709	PTPN22	PTPN22	Lymphocyte signaling	35
rs17510162	chr1	114125773	PTPN22	PTPN22	Lymphocyte signaling	35
rs1217385	chr1	114130247	PTPN22	PTPN22	Lymphocyte signaling	35
rs14804	chr1	114961885	NRAS	Ras	ERK/MAPK Signaling	35
rs969273	chr1	114968711	NRAS	Ras	ERK/MAPK Signaling	35
rs8453	chr1	114971641	NRAS	Ras	ERK/MAPK Signaling	35
rs1065634	chr1	114971810	NRAS	Ras	ERK/MAPK Signaling	35
rs10489525	chr1	114975727	NRAS	Ras	ERK/MAPK Signaling	35
rs6692870	chr1	114975833	NRAS	Ras	ERK/MAPK Signaling	35
rs10802189	chr1	116768772	CD58	CD58	Adhesion	35
rs871493	chr1	116770431	CD58	CD58	Adhesion	35
rs10802191	chr1	116777125	CD58	CD58	Adhesion	35
rs7542681	chr1	116822384	CD58	CD58	Adhesion	35
rs6703791	chr1	116834172	IGSF3	CD101	Lymphocyte signaling	35
rs2284860	chr1	116834929	IGSF3	CD101	Lymphocyte signaling	35
rs667830	chr1	116865608	IGSF3	CD101	Lymphocyte signaling	35
rs12750589	chr1	116876633	IGSF3	CD101	Lymphocyte signaling	35
rs555980	chr1	116890344	IGSF3	CD101	Lymphocyte signaling	35
rs797726	chr1	116909277	IGSF3	CD101	Lymphocyte signaling	35
rs542749	chr1	116910053	IGSF3	CD101	Lymphocyte signaling	35
rs484888	chr1	116917826	IGSF3	CD101	Lymphocyte signaling	35
rs1981183	chr1	116918378	IGSF3	CD101	Lymphocyte signaling	35
rs599563	chr1	116924636	IGSF3	CD101	Lymphocyte signaling	35
rs797999	chr1	117005805	CD2	CD2	Adhesion	35
rs10737725	chr1	117006820	CD2	CD2	Adhesion	35
rs6701046	chr1	117009776	CD2	CD2	Adhesion	35
rs3136701	chr1	117011514	CD2	CD2	Adhesion	35
rs3136706	chr1	117017118	CD2	CD2	Adhesion	35
rs798037	chr1	117020280	CD2	CD2	Adhesion	35
rs10494191	chr1	117256057	IGSF2	CD101	Lymphocyte signaling	35
rs12130298	chr1	117256373	IGSF2	CD101	Lymphocyte signaling	35
rs10494192	chr1	117256744	IGSF2	CD101	Lymphocyte signaling	35
rs2764852	chr1	117258653	IGSF2	CD101	Lymphocyte signaling	35
rs2806873	chr1	117262369	IGSF2	CD101	Lymphocyte signaling	35
rs2764850	chr1	117262665	IGSF2	CD101	Lymphocyte signaling	35
rs12038029	chr1	117264121	IGSF2	CD101	Lymphocyte signaling	35
rs7554376	chr1	117264602	IGSF2	CD101	Lymphocyte signaling	35
rs3754112	chr1	117266463	IGSF2	CD101	Lymphocyte signaling	35
rs12407870	chr1	117269178	IGSF2	CD101	Lymphocyte signaling	35
rs2249265	chr1	117271768	IGSF2	CD101	Lymphocyte signaling	35
rs3767787	chr1	117272584	IGSF2	CD101	Lymphocyte signaling	35
rs17587765	chr1	117283121	IGSF2	CD101	Lymphocyte signaling	35
rs6686551	chr1	117285215	IGSF2	CD101	Lymphocyte signaling	35
rs10494195	chr1	117286672	IGSF2	CD101	Lymphocyte signaling	35
rs4659352	chr1	117286692	IGSF2	CD101	Lymphocyte signaling	35
rs2296449	chr1	117290792	IGSF2	CD101	Lymphocyte signaling	35
rs1937956	chr1	117399167	VTCN1	B7-H4	B7 family	35
rs7523182	chr1	117400095	VTCN1	B7-H4	B7 family	35
rs10754339	chr1	117402314	VTCN1	B7-H4	B7 family	35
rs1892410	chr1	117420706	VTCN1	B7-H4	B7 family	35
rs4659159	chr1	117428318	VTCN1	B7-H4	B7 family	35
rs2884558	chr1	117434040	VTCN1	B7-H4	B7 family	35
rs2185815	chr1	117435673	VTCN1	B7-H4	B7 family	35
rs10923217	chr1	117442090	VTCN1	B7-H4	B7 family	35
rs12025144	chr1	117442116	VTCN1	B7-H4	B7 family	35
rs17036925	chr1	117444213	VTCN1	B7-H4	B7 family	35
rs12038533	chr1	117444558	VTCN1	B7-H4	B7 family	35
rs7365014	chr1	117449528	VTCN1	B7-H4	B7 family	35
rs1935780	chr1	117450679	VTCN1	B7-H4	B7 family	35
rs7415876	chr1	117458198	VTCN1	B7-H4	B7 family	35
rs10923223	chr1	117458615	VTCN1	B7-H4	B7 family	35
rs12076501	chr1	117458681	VTCN1	B7-H4	B7 family	35
rs12046117	chr1	117463407	VTCN1	B7-H4	B7 family	35
rs12046916	chr1	117463767	VTCN1	B7-H4	B7 family	35
rs3806374	chr1	117466261	VTCN1	B7-H4	B7 family	35
rs6690137	chr1	117468274	VTCN1	B7-H4	B7 family	35
rs7537801	chr1	117469953	VTCN1	B7-H4	B7 family	35
rs17354559	chr1	143072982	PIAS3	PIAS3	JAK/Stat Signaling	35
rs10910829	chr1	143075824	PIAS3	PIAS3	JAK/Stat Signaling	35
rs2004659	chr1	143077228	PIAS3	PIAS3	JAK/Stat Signaling	35
rs4970874	chr1	143198438	CD160	CD160	Natural Killer Cell Signaling	35
rs744877	chr1	143203420	CD160	CD160	Natural Killer Cell Signaling	35
rs6587756	chr1	147359938	MCL1	Mcl1	Apoptosis Signaling	35
rs9803935	chr1	147365695	MCL1	Mcl1	Apoptosis Signaling	35
rs12034302	chr1	147367949	MCL1	Mcl1	Apoptosis Signaling	35
rs7521898	chr1	147520669	CTSS	cathespin S	Phagocytosis-Ag presentation	35
rs11576175	chr1	147540467	CTSS	cathespin S	Phagocytosis-Ag presentation	35
rs7532045	chr1	147634920	FCGR1C	CD64c, Fc gamma receptor 1c	Lymphocyte signaling	35
rs6684312	chr1	148657723	THEM4	CTMP	PI3K/AKT Signaling	35
rs6690443	chr1	148672226	THEM4	CTMP	PI3K/AKT Signaling	35
rs4845393	chr1	148677340	THEM4	CTMP	PI3K/AKT Signaling	35
rs11204910	chr1	148684549	THEM4	CTMP	PI3K/AKT Signaling	35
rs10788817	chr1	148695929	THEM4	CTMP	PI3K/AKT Signaling	35
rs11205265	chr1	150081918	PGLYRP3	Peptidoglycan recognition protein 3	Toll-like Receptor Signaling	35
rs1347251	chr1	150082257	PGLYRP3	Peptidoglycan recognition protein 3	Toll-like Receptor Signaling	35
rs821431	chr1	150084597	PGLYRP3	Peptidoglycan recognition protein 3	Toll-like Receptor Signaling	35
rs843971	chr1	150090496	PGLYRP3	Peptidoglycan recognition protein 3	Toll-like Receptor Signaling	35
rs821421	chr1	150096596	PGLYRP3	Peptidoglycan recognition protein 3	Toll-like Receptor Signaling	35
rs2987763	chr1	150099107	PGLYRP3	Peptidoglycan recognition protein 3	Toll-like Receptor Signaling	35
rs2987766	chr1	150115278	PGLYRP4	Peptidoglycan recognition protein 4	Toll-like Receptor Signaling	35
rs1655310	chr1	150117003	PGLYRP4	Peptidoglycan recognition protein 4	Toll-like Receptor Signaling	35
rs821432	chr1	150125033	PGLYRP4	Peptidoglycan recognition protein 4	Toll-like Receptor Signaling	35
rs12063091	chr1	150126117	PGLYRP4	Peptidoglycan recognition protein 4	Toll-like Receptor Signaling	35
rs3006448	chr1	150127226	PGLYRP4	Peptidoglycan recognition protein 4	Toll-like Receptor Signaling	35
rs3006453	chr1	150130796	PGLYRP4	Peptidoglycan recognition protein 4	Toll-like Receptor Signaling	35
rs2288990	chr1	150131081	PGLYRP4	Peptidoglycan recognition protein 4	Toll-like Receptor Signaling	35
rs3006458	chr1	150133445	PGLYRP4	Peptidoglycan recognition protein 4	Toll-like Receptor Signaling	35
rs12561811	chr1	150137621	PGLYRP4	Peptidoglycan recognition protein 4	Toll-like Receptor Signaling	35
rs12027903	chr1	150140829	S100A9	S100 A9	Miscellaneous	35
rs3006471	chr1	150141182	S100A9	S100 A9	Miscellaneous	35
rs11205276	chr1	150141957	S100A9	S100 A9	Miscellaneous	35
rs3014866	chr1	150142144	S100A9	S100 A9	Miscellaneous	35
rs12119788	chr1	150143251	S100A9	S100 A9	Miscellaneous	35
rs1560833	chr1	150147598	S100A9	S100 A9	Miscellaneous	35
rs3006475	chr1	150157709	S100A12	S100 A12	Miscellaneous	35
rs4845346	chr1	150180186	S100A8	S100 A8	Miscellaneous	35
rs3795396	chr1	150448498	ILF2	IL-2 binding factor 2	Lymphocyte signaling	35
rs6427671	chr1	150450477	ILF2	IL-2 binding factor 2	Lymphocyte signaling	35
rs7536700	chr1	150453900	ILF2	IL-2 binding factor 2	Lymphocyte signaling	35
rs10908848	chr1	150458953	ILF2	IL-2 binding factor 2	Lymphocyte signaling	35
rs4845617	chr1	151190971	IL6R	interleukin 6 receptor	Cytokines	35
rs12083537	chr1	151194176	IL6R	interleukin 6 receptor	Cytokines	35
rs4075015	chr1	151202269	IL6R	interleukin 6 receptor	Cytokines	35
rs6684439	chr1	151208912	IL6R	interleukin 6 receptor	Cytokines	35
rs4845371	chr1	151221413	IL6R	interleukin 6 receptor	Cytokines	35
rs7529229	chr1	151233851	IL6R	interleukin 6 receptor	Cytokines	35
rs4845374	chr1	151240020	IL6R	interleukin 6 receptor	Cytokines	35
rs8192284	chr1	151240043	IL6R	interleukin 6 receptor	Cytokines	35
rs4341355	chr1	151249477	IL6R	interleukin 6 receptor	Cytokines	35
rs2229238	chr1	151250969	IL6R	interleukin 6 receptor	Cytokines	35
rs4845401	chr1	151754666	SHC1	SHC	ERK/MAPK Signaling	35
rs4072037	chr1	151975140	MUC1	CD227, mucin-1	Miscellaneous	35
rs821551	chr1	152501653	DAP3	DAP3	Apoptosis Signaling	35
rs644853	chr1	152519290	DAP3	DAP3	Apoptosis Signaling	35
rs2485662	chr1	152896541	LMNA	Lamin A	Apoptosis Signaling	35
rs6686943	chr1	152906064	LMNA	Lamin A	Apoptosis Signaling	35
rs9427236	chr1	152906479	LMNA	Lamin A	Apoptosis Signaling	35
rs528636	chr1	152911693	LMNA	Lamin A	Apoptosis Signaling	35
rs2274316	chr1	153259315	MEF2D	MEF2	p38 MAPK Signaling	35
rs2274317	chr1	153259976	MEF2D	MEF2	p38 MAPK Signaling	35
rs1750305	chr1	153267457	MEF2D	MEF2	p38 MAPK Signaling	35
rs947660	chr1	153273381	MEF2D	MEF2	p38 MAPK Signaling	35
rs746527	chr1	153273584	MEF2D	MEF2	p38 MAPK Signaling	35
rs10489823	chr1	154959459	CD1D	CD1D	Phagocytosis-Ag presentation	35
rs3021477	chr1	154960019	CD1D	CD1D	Phagocytosis-Ag presentation	35
rs692565	chr1	154966599	CD1D	CD1D	Phagocytosis-Ag presentation	35
rs3181029	chr1	155033038	CD1A	CD1A	Phagocytosis-Ag presentation	35
rs3181030	chr1	155033364	CD1A	CD1A	Phagocytosis-Ag presentation	35
rs411089	chr1	155037898	CD1A	CD1A	Phagocytosis-Ag presentation	35
rs2269715	chr1	155038092	CD1A	CD1A	Phagocytosis-Ag presentation	35
rs389293	chr1	155041465	CD1A	CD1A	Phagocytosis-Ag presentation	35
rs12033535	chr1	155069369	CD1C	CD1C	Phagocytosis-Ag presentation	35
rs10797006	chr1	155070911	CD1C	CD1C	Phagocytosis-Ag presentation	35
rs3138099	chr1	155074088	CD1C	CD1C	Phagocytosis-Ag presentation	35
rs11583390	chr1	155110937	CD1B	CD1B	Phagocytosis-Ag presentation	35
rs962879	chr1	155113379	CD1B	CD1B	Phagocytosis-Ag presentation	35
rs716221	chr1	155116945	CD1B	CD1B	Phagocytosis-Ag presentation	35
rs12038925	chr1	155132522	CD1E	CD1E	Phagocytosis-Ag presentation	35
rs1065457	chr1	155137498	CD1E	CD1E	Phagocytosis-Ag presentation	35
rs9887904	chr1	155791669	IFI16	IFN-gamma inducible protein 16	ERK/MAPK Signaling	35
rs1417806	chr1	155792264	IFI16	IFN-gamma inducible protein 16	ERK/MAPK Signaling	35
rs2276404	chr1	155793023	IFI16	IFN-gamma inducible protein 16	ERK/MAPK Signaling	35
rs866484	chr1	155799550	IFI16	IFN-gamma inducible protein 16	ERK/MAPK Signaling	35
rs1057024	chr1	155803320	IFI16	IFN-gamma inducible protein 16	ERK/MAPK Signaling	35
rs11265131	chr1	155804539	IFI16	IFN-gamma inducible protein 16	ERK/MAPK Signaling	35
rs1772415	chr1	155815851	IFI16	IFN-gamma inducible protein 16	ERK/MAPK Signaling	35
rs7532207	chr1	155837497	IFI16	IFN-gamma inducible protein 16	ERK/MAPK Signaling	35
rs6940	chr1	155837741	IFI16	IFN-gamma inducible protein 16	ERK/MAPK Signaling	35
rs3027012	chr1	155987196	DARC	Duffy blood group, chemokine receptor	Chemokines	35
rs863002	chr1	155987993	DARC	Duffy blood group, chemokine receptor	Chemokines	35
rs12075	chr1	155988427	DARC	Duffy blood group, chemokine receptor	Chemokines	35
rs13962	chr1	155988600	DARC	Duffy blood group, chemokine receptor	Chemokines	35
rs3027031	chr1	155991346	DARC	Duffy blood group, chemokine receptor	Chemokines	35
rs2511214	chr1	156067939	FCER1A	IgE receptor I, high affinity	Surface receptors	35
rs2427837	chr1	156071618	FCER1A	IgE receptor I, high affinity	Surface receptors	35
rs3845625	chr1	156078949	FCER1A	IgE receptor I, high affinity	Surface receptors	35
rs12119226	chr1	156085837	FCER1A	IgE receptor I, high affinity	Surface receptors	35
rs2494265	chr1	156088347	FCER1A	IgE receptor I, high affinity	Surface receptors	35
rs16842010	chr1	156093067	FCER1A	IgE receptor I, high affinity	Surface receptors	35
rs2808630	chr1	156493941	CRP	CRP	Miscellaneous	35
rs1800947	chr1	156496511	CRP	CRP	Miscellaneous	35
rs1417938	chr1	156497259	CRP	CRP	Miscellaneous	35
rs16831153	chr1	156733792	SLAMF9	SLAMF9	Lymphocyte signaling	35
rs2789417	chr1	156736184	SLAMF9	SLAMF9	Lymphocyte signaling	35
rs2840584	chr1	156738504	SLAMF9	SLAMF9	Lymphocyte signaling	35
rs12144158	chr1	156740980	SLAMF9	SLAMF9	Lymphocyte signaling	35
rs1316963	chr1	156741784	SLAMF9	SLAMF9	Lymphocyte signaling	35
rs3795327	chr1	157271855	SLAMF6	SLAMF6	Lymphocyte signaling	35
rs12137007	chr1	157276479	SLAMF6	SLAMF6	Lymphocyte signaling	35
rs678456	chr1	157277621	SLAMF6	SLAMF6	Lymphocyte signaling	35
rs1249548	chr1	157281829	SLAMF6	SLAMF6	Lymphocyte signaling	35
rs1268524	chr1	157283331	SLAMF6	SLAMF6	Lymphocyte signaling	35
rs2025517	chr1	157283840	SLAMF6	SLAMF6	Lymphocyte signaling	35
rs17385337	chr1	157285212	SLAMF6	SLAMF6	Lymphocyte signaling	35
rs6660233	chr1	157286236	SLAMF6	SLAMF6	Lymphocyte signaling	35
rs12401994	chr1	157294735	SLAMF6	SLAMF6	Lymphocyte signaling	35
rs1061217	chr1	157393088	SLAMF1	SLAMF1	Lymphocyte signaling	35
rs3796504	chr1	157393622	SLAMF1	SLAMF1	Lymphocyte signaling	35
rs17394362	chr1	157394025	SLAMF1	SLAMF1	Lymphocyte signaling	35
rs927202	chr1	157396437	SLAMF1	SLAMF1	Lymphocyte signaling	35
rs16832283	chr1	157405070	SLAMF1	SLAMF1	Lymphocyte signaling	35
rs1503854	chr1	157412083	SLAMF1	SLAMF1	Lymphocyte signaling	35
rs3753383	chr1	157412725	SLAMF1	SLAMF1	Lymphocyte signaling	35
rs6704124	chr1	157415321	SLAMF1	SLAMF1	Lymphocyte signaling	35
rs164288	chr1	157417546	SLAMF1	SLAMF1	Lymphocyte signaling	35
rs3766364	chr1	157425212	SLAMF1	SLAMF1	Lymphocyte signaling	35
rs2295612	chr1	157429776	SLAMF1	SLAMF1	Lymphocyte signaling	35
rs11265455	chr1	157433224	SLAMF1	SLAMF1	Lymphocyte signaling	35
rs1553456	chr1	157461469	CD48	CD48	Adhesion	35
rs10489636	chr1	157464823	CD48	CD48	Adhesion	35
rs10489637	chr1	157465549	CD48	CD48	Adhesion	35
rs3796502	chr1	157465803	CD48	CD48	Adhesion	35
rs10489638	chr1	157467139	CD48	CD48	Adhesion	35
rs2295615	chr1	157467831	CD48	CD48	Adhesion	35
rs1980606	chr1	157467859	CD48	CD48	Adhesion	35
rs1265811	chr1	157473434	CD48	CD48	Adhesion	35
rs1265823	chr1	157483760	CD48	CD48	Adhesion	35
rs978763	chr1	157486852	CD48	CD48	Adhesion	35
rs10489639	chr1	157492600	CD48	CD48	Adhesion	35
rs352692	chr1	157499567	CD48	CD48	Adhesion	35
rs11265473	chr1	157536521	SLAMF7	SLAMF7	Lymphocyte signaling	35
rs512645	chr1	157611199	CD244	2B4	Natural Killer Cell Signaling	35
rs11265492	chr1	157612347	CD244	2B4	Natural Killer Cell Signaling	35
rs480104	chr1	157614119	CD244	2B4	Natural Killer Cell Signaling	35
rs3766378	chr1	157620482	CD244	2B4	Natural Killer Cell Signaling	35
rs512525	chr1	157626816	CD244	2B4	Natural Killer Cell Signaling	35
rs7416548	chr1	157627493	CD244	2B4	Natural Killer Cell Signaling	35
rs12131917	chr1	157637117	CD244	2B4	Natural Killer Cell Signaling	35
rs12035295	chr1	157643735	CD244	2B4	Natural Killer Cell Signaling	35
rs4656942	chr1	157644121	CD244	2B4	Natural Killer Cell Signaling	35
rs2247459	chr1	157789073	F11R	F11R	Adhesion	35
rs2039223	chr1	157798781	F11R	F11R	Adhesion	35
rs6695707	chr1	157804894	F11R	F11R	Adhesion	35
rs7546890	chr1	157808465	F11R	F11R	Adhesion	35
rs11576837	chr1	157816947	F11R	F11R	Adhesion	35
rs11265544	chr1	157819092	F11R	F11R	Adhesion	35
rs2774276	chr1	157824789	F11R	F11R	Adhesion	35
rs11576415	chr1	157995281	FCER1G	FCER1	Natural Killer Cell Signaling	35
rs10797094	chr1	157995745	FCER1G	FCER1	Natural Killer Cell Signaling	35
rs17391018	chr1	157997170	FCER1G	FCER1	Natural Killer Cell Signaling	35
rs11587213	chr1	157997948	FCER1G	FCER1	Natural Killer Cell Signaling	35
rs2070902	chr1	158000738	FCER1G	FCER1	Natural Killer Cell Signaling	35
rs3557	chr1	158001966	FCER1G	FCER1	Natural Killer Cell Signaling	35
rs11421	chr1	158002009	FCER1G	FCER1	Natural Killer Cell Signaling	35
rs4489574	chr1	158002786	FCER1G	FCER1	Natural Killer Cell Signaling	35
rs10800309	chr1	158285213	FCGR2A	FCGR2	Natural Killer Cell Signaling	35
rs4656308	chr1	158291806	FCGR2A	FCGR2	Natural Killer Cell Signaling	35
rs1801274	chr1	158292800	FCGR2A	FCGR2	Natural Killer Cell Signaling	35
rs12142755	chr1	158294798	FCGR2A	FCGR2	Natural Killer Cell Signaling	35
rs373579	chr1	158296539	FCGR2A	FCGR2	Natural Killer Cell Signaling	35
rs2446625	chr1	158297103	FCGR2A	FCGR2	Natural Killer Cell Signaling	35
rs6427596	chr1	158297230	FCGR2A	FCGR2	Natural Killer Cell Signaling	35
rs6427597	chr1	158297335	FCGR2A	FCGR2	Natural Killer Cell Signaling	35
rs6427598	chr1	158297619	FCGR2A	FCGR2	Natural Killer Cell Signaling	35
rs410236	chr1	158297691	FCGR2A	FCGR2	Natural Killer Cell Signaling	35
rs374681	chr1	158299670	FCGR2A	FCGR2	Natural Killer Cell Signaling	35
rs10919033	chr1	158301072	FCGR2A	FCGR2	Natural Killer Cell Signaling	35
rs511278	chr1	158303951	FCGR2A	FCGR2	Natural Killer Cell Signaling	35
rs11581523	chr1	158324096	FCGR3A	FCGR3	Natural Killer Cell Signaling	35
rs16842916	chr1	158324148	FCGR3A	FCGR3	Natural Killer Cell Signaling	35
rs4657061	chr1	158324277	FCGR3A	FCGR3	Natural Killer Cell Signaling	35
rs7539036	chr1	158325786	FCGR3A	FCGR3	Natural Killer Cell Signaling	35
rs449463	chr1	158326503	FCGR3A	FCGR3	Natural Killer Cell Signaling	35
rs424288	chr1	158326814	FCGR3A	FCGR3	Natural Killer Cell Signaling	35
rs17410889	chr1	158327357	FCGR3A	FCGR3	Natural Killer Cell Signaling	35
rs2290834	chr1	158331269	FCGR3A	FCGR3	Natural Killer Cell Signaling	35
rs2290835	chr1	158331673	FCGR3A	FCGR3	Natural Killer Cell Signaling	35
rs12127809	chr1	158331934	FCGR3A	FCGR3	Natural Killer Cell Signaling	35
rs378385	chr1	158337108	FCGR3A	FCGR3	Natural Killer Cell Signaling	35
rs1256289	chr1	158360332	FCGR2B	IgG receptor IIB, CD32	Surface receptors	35
rs12141384	chr1	158360375	FCGR2B	IgG receptor IIB, CD32	Surface receptors	35
rs1771596	chr1	158361544	FCGR2B	IgG receptor IIB, CD32	Surface receptors	35
rs10917625	chr1	158361898	FCGR2B	IgG receptor IIB, CD32	Surface receptors	35
rs2333843	chr1	158363480	FCGR2B	IgG receptor IIB, CD32	Surface receptors	35
rs3754056	chr1	158363881	FCGR2B	IgG receptor IIB, CD32	Surface receptors	35
rs6681090	chr1	158364720	FCGR2B	IgG receptor IIB, CD32	Surface receptors	35
rs10799884	chr1	158365263	FCGR2B	IgG receptor IIB, CD32	Surface receptors	35
rs1832738	chr1	158365445	FCGR2B	IgG receptor IIB, CD32	Surface receptors	35
rs11588528	chr1	158366840	FCGR2B	IgG receptor IIB, CD32	Surface receptors	35
rs12097030	chr1	158369303	FCGR2B	IgG receptor IIB, CD32	Surface receptors	35
rs11809860	chr1	158369608	FCGR2B	IgG receptor IIB, CD32	Surface receptors	35
rs2007773	chr1	158370202	FCGR2B	IgG receptor IIB, CD32	Surface receptors	35
rs12116547	chr1	158370262	FCGR2B	IgG receptor IIB, CD32	Surface receptors	35
rs1771552	chr1	158371042	FCGR2B	IgG receptor IIB, CD32	Surface receptors	35
rs2333845	chr1	158371131	FCGR2B	IgG receptor IIB, CD32	Surface receptors	35
rs1984769	chr1	158371226	FCGR2B	IgG receptor IIB, CD32	Surface receptors	35
rs922087	chr1	158371762	FCGR2B	IgG receptor IIB, CD32	Surface receptors	35
rs10917661	chr1	158372884	FCGR2B	IgG receptor IIB, CD32	Surface receptors	35
rs4999919	chr1	158373874	FCGR2B	IgG receptor IIB, CD32	Surface receptors	35
rs2045571	chr1	158374936	FCGR2B	IgG receptor IIB, CD32	Surface receptors	35
rs7552498	chr1	158375330	FCGR2B	IgG receptor IIB, CD32	Surface receptors	35
rs1674757	chr1	158376054	FCGR2B	IgG receptor IIB, CD32	Surface receptors	35
rs12145586	chr1	158376330	FCGR2B	IgG receptor IIB, CD32	Surface receptors	35
rs1674759	chr1	158376926	FCGR2B	IgG receptor IIB, CD32	Surface receptors	35
rs2655732	chr1	159095390	SH2D1B	EAT-2	Natural Killer Cell Signaling	35
rs12139643	chr1	159100832	SH2D1B	EAT-2	Natural Killer Cell Signaling	35
rs2655730	chr1	159101675	SH2D1B	EAT-2	Natural Killer Cell Signaling	35
rs10753802	chr1	159103056	SH2D1B	EAT-2	Natural Killer Cell Signaling	35
rs2632549	chr1	159103528	SH2D1B	EAT-2	Natural Killer Cell Signaling	35
rs351450	chr1	159106467	SH2D1B	EAT-2	Natural Killer Cell Signaling	35
rs12746024	chr1	159106511	SH2D1B	EAT-2	Natural Killer Cell Signaling	35
rs6426926	chr1	162330562	MGST3	microsomal glutathione S-transferase 3	Eicosanoid Signaling	35
rs4626863	chr1	162330653	MGST3	microsomal glutathione S-transferase 3	Eicosanoid Signaling	35
rs10800118	chr1	162331432	MGST3	microsomal glutathione S-transferase 3	Eicosanoid Signaling	35
rs6657788	chr1	162331462	MGST3	microsomal glutathione S-transferase 3	Eicosanoid Signaling	35
rs9333378	chr1	162333124	MGST3	microsomal glutathione S-transferase 3	Eicosanoid Signaling	35
rs6692264	chr1	162334145	MGST3	microsomal glutathione S-transferase 3	Eicosanoid Signaling	35
rs4147598	chr1	162334182	MGST3	microsomal glutathione S-transferase 3	Eicosanoid Signaling	35
rs7523515	chr1	162334908	MGST3	microsomal glutathione S-transferase 3	Eicosanoid Signaling	35
rs10800120	chr1	162336968	MGST3	microsomal glutathione S-transferase 3	Eicosanoid Signaling	35
rs9333413	chr1	162340958	MGST3	microsomal glutathione S-transferase 3	Eicosanoid Signaling	35
rs7554034	chr1	162342122	MGST3	microsomal glutathione S-transferase 3	Eicosanoid Signaling	35
rs9333449	chr1	162345910	MGST3	microsomal glutathione S-transferase 3	Eicosanoid Signaling	35
rs957644	chr1	162347815	MGST3	microsomal glutathione S-transferase 3	Eicosanoid Signaling	35
rs10918226	chr1	162349630	MGST3	microsomal glutathione S-transferase 3	Eicosanoid Signaling	35
rs2271657	chr1	162352260	MGST3	microsomal glutathione S-transferase 3	Eicosanoid Signaling	35
rs11799886	chr1	162352450	MGST3	microsomal glutathione S-transferase 3	Eicosanoid Signaling	35
rs4147602	chr1	162353436	MGST3	microsomal glutathione S-transferase 3	Eicosanoid Signaling	35
rs10918228	chr1	162353465	MGST3	microsomal glutathione S-transferase 3	Eicosanoid Signaling	35
rs2297765	chr1	162353865	MGST3	microsomal glutathione S-transferase 3	Eicosanoid Signaling	35
rs11800476	chr1	162354143	MGST3	microsomal glutathione S-transferase 3	Eicosanoid Signaling	35
rs10494446	chr1	162357567	MGST3	microsomal glutathione S-transferase 3	Eicosanoid Signaling	35
rs870875	chr1	164131392	CD3Z	CD3Z	Lymphocyte signaling	35
rs952963	chr1	164134870	CD3Z	CD3Z	Lymphocyte signaling	35
rs12060404	chr1	164139927	CD3Z	CD3Z	Lymphocyte signaling	35
rs1404567	chr1	164140532	CD3Z	CD3Z	Lymphocyte signaling	35
rs864537	chr1	164143042	CD3Z	CD3Z	Lymphocyte signaling	35
rs1214596	chr1	164158828	CD3Z	CD3Z	Lymphocyte signaling	35
rs2988276	chr1	164163061	CD3Z	CD3Z	Lymphocyte signaling	35
rs10918694	chr1	164163654	CD3Z	CD3Z	Lymphocyte signaling	35
rs1723015	chr1	164164552	CD3Z	CD3Z	Lymphocyte signaling	35
rs1723018	chr1	164165078	CD3Z	CD3Z	Lymphocyte signaling	35
rs7523351	chr1	164168921	CD3Z	CD3Z	Lymphocyte signaling	35
rs10918695	chr1	164169611	CD3Z	CD3Z	Lymphocyte signaling	35
rs2949659	chr1	164171196	CD3Z	CD3Z	Lymphocyte signaling	35
rs7518703	chr1	164180050	CD3Z	CD3Z	Lymphocyte signaling	35
rs1214611	chr1	164180762	CD3Z	CD3Z	Lymphocyte signaling	35
rs1214609	chr1	164181266	CD3Z	CD3Z	Lymphocyte signaling	35
rs12737372	chr1	164182773	CD3Z	CD3Z	Lymphocyte signaling	35
rs12141731	chr1	164183098	CD3Z	CD3Z	Lymphocyte signaling	35
rs2949656	chr1	164183487	CD3Z	CD3Z	Lymphocyte signaling	35
rs10918698	chr1	164184417	CD3Z	CD3Z	Lymphocyte signaling	35
rs12144621	chr1	164185316	CD3Z	CD3Z	Lymphocyte signaling	35
rs858557	chr1	164186004	CD3Z	CD3Z	Lymphocyte signaling	35
rs1214603	chr1	164186345	CD3Z	CD3Z	Lymphocyte signaling	35
rs863455	chr1	164189482	CD3Z	CD3Z	Lymphocyte signaling	35
rs858547	chr1	164189725	CD3Z	CD3Z	Lymphocyte signaling	35
rs10918702	chr1	164189750	CD3Z	CD3Z	Lymphocyte signaling	35
rs858546	chr1	164192980	CD3Z	CD3Z	Lymphocyte signaling	35
rs704848	chr1	164193531	CD3Z	CD3Z	Lymphocyte signaling	35
rs10918706	chr1	164197779	CD3Z	CD3Z	Lymphocyte signaling	35
rs858543	chr1	164198956	CD3Z	CD3Z	Lymphocyte signaling	35
rs704853	chr1	164200522	CD3Z	CD3Z	Lymphocyte signaling	35
rs17534481	chr1	164202475	CD3Z	CD3Z	Lymphocyte signaling	35
rs858539	chr1	164202653	CD3Z	CD3Z	Lymphocyte signaling	35
rs1737506	chr1	164205083	CD3Z	CD3Z	Lymphocyte signaling	35
rs6686571	chr1	164205478	CD3Z	CD3Z	Lymphocyte signaling	35
rs2982484	chr1	164209595	CD3Z	CD3Z	Lymphocyte signaling	35
rs858550	chr1	164211423	CD3Z	CD3Z	Lymphocyte signaling	35
rs12095738	chr1	164211645	CD3Z	CD3Z	Lymphocyte signaling	35
rs704856	chr1	164212698	CD3Z	CD3Z	Lymphocyte signaling	35
rs2982481	chr1	164214964	CD3Z	CD3Z	Lymphocyte signaling	35
rs2982479	chr1	164216546	CD3Z	CD3Z	Lymphocyte signaling	35
rs3820390	chr1	164219538	CD3Z	CD3Z	Lymphocyte signaling	35
rs863454	chr1	164220457	CD3Z	CD3Z	Lymphocyte signaling	35
rs2995054	chr1	164220542	CD3Z	CD3Z	Lymphocyte signaling	35
rs6698995	chr1	164223433	CD3Z	CD3Z	Lymphocyte signaling	35
rs2143302	chr1	164223845	CD3Z	CD3Z	Lymphocyte signaling	35
rs7532420	chr1	165273521	XCL1	Lymphotactin	Chemokines	35
rs16860928	chr1	165273699	XCL1	Lymphotactin	Chemokines	35
rs3753938	chr1	165275889	XCL1	Lymphotactin	Chemokines	35
rs966065	chr1	165278832	XCL1	Lymphotactin	Chemokines	35
rs4656156	chr1	165280174	XCL1	Lymphotactin	Chemokines	35
rs6700487	chr1	165281543	XCL1	Lymphotactin	Chemokines	35
rs1042882	chr1	165282193	XCL1	Lymphotactin	Chemokines	35
rs982143	chr1	165282894	XCL1	Lymphotactin	Chemokines	35
rs3917848	chr1	166291449	SELP	P-selectin	Adhesion	35
rs3917843	chr1	166291915	SELP	P-selectin	Adhesion	35
rs6128	chr1	166294562	SELP	P-selectin	Adhesion	35
rs6136	chr1	166295609	SELP	P-selectin	Adhesion	35
rs742127	chr1	166295825	SELP	P-selectin	Adhesion	35
rs6133	chr1	166297004	SELP	P-selectin	Adhesion	35
rs3917792	chr1	166299490	SELP	P-selectin	Adhesion	35
rs760694	chr1	166300356	SELP	P-selectin	Adhesion	35
rs3917786	chr1	166301103	SELP	P-selectin	Adhesion	35
rs3917751	chr1	166308226	SELP	P-selectin	Adhesion	35
rs3917744	chr1	166309648	SELP	P-selectin	Adhesion	35
rs2076074	chr1	166310244	SELP	P-selectin	Adhesion	35
rs3917740	chr1	166310924	SELP	P-selectin	Adhesion	35
rs3917739	chr1	166311036	SELP	P-selectin	Adhesion	35
rs2235305	chr1	166311303	SELP	P-selectin	Adhesion	35
rs6131	chr1	166312543	SELP	P-selectin	Adhesion	35
rs3917727	chr1	166312916	SELP	P-selectin	Adhesion	35
rs6125	chr1	166313975	SELP	P-selectin	Adhesion	35
rs2236868	chr1	166315654	SELP	P-selectin	Adhesion	35
rs3917709	chr1	166316203	SELP	P-selectin	Adhesion	35
rs2244529	chr1	166318690	SELP	P-selectin	Adhesion	35
rs3917698	chr1	166319775	SELP	P-selectin	Adhesion	35
rs3917686	chr1	166322822	SELP	P-selectin	Adhesion	35
rs3917679	chr1	166323511	SELP	P-selectin	Adhesion	35
rs3917678	chr1	166323553	SELP	P-selectin	Adhesion	35
rs3917862	chr1	166324771	SELP	P-selectin	Adhesion	35
rs3917657	chr1	166330400	SELP	P-selectin	Adhesion	35
rs1800805	chr1	166332939	SELP	P-selectin	Adhesion	35
rs6691334	chr1	166334041	SELP	P-selectin	Adhesion	35
rs12938	chr1	166392439	SELL	L-selectin, CD62L	Adhesion	35
rs2298902	chr1	166394737	SELL	L-selectin, CD62L	Adhesion	35
rs2223286	chr1	166397290	SELL	L-selectin, CD62L	Adhesion	35
rs4987351	chr1	166399013	SELL	L-selectin, CD62L	Adhesion	35
rs12137905	chr1	166404525	SELL	L-selectin, CD62L	Adhesion	35
rs4987310	chr1	166405496	SELL	L-selectin, CD62L	Adhesion	35
rs4987301	chr1	166406868	SELL	L-selectin, CD62L	Adhesion	35
rs2205848	chr1	166407951	SELL	L-selectin, CD62L	Adhesion	35
rs3177980	chr1	166408144	SELL	L-selectin, CD62L	Adhesion	35
rs3766129	chr1	166408951	SELL	L-selectin, CD62L	Adhesion	35
rs6693963	chr1	166417103	SELL	L-selectin, CD62L	Adhesion	35
rs7513119	chr1	166422474	SELE	E-selectin	Adhesion	35
rs3917438	chr1	166425508	SELE	E-selectin	Adhesion	35
rs5355	chr1	166427528	SELE	E-selectin	Adhesion	35
rs5368	chr1	166428604	SELE	E-selectin	Adhesion	35
rs2076059	chr1	166430579	SELE	E-selectin	Adhesion	35
rs3917412	chr1	166432160	SELE	E-selectin	Adhesion	35
rs3917454	chr1	166432511	SELE	E-selectin	Adhesion	35
rs5361	chr1	166432718	SELE	E-selectin	Adhesion	35
rs932307	chr1	166434363	SELE	E-selectin	Adhesion	35
rs7538317	chr1	166439234	SELE	E-selectin	Adhesion	35
rs12408179	chr1	166439785	SELE	E-selectin	Adhesion	35
rs2859242	chr1	169356521	FASLG	FasL	Death Receptor Signaling	35
rs2639614	chr1	169357614	FASLG	FasL	Death Receptor Signaling	35
rs6700734	chr1	169362468	FASLG	FasL	Death Receptor Signaling	35
rs929087	chr1	169363714	FASLG	FasL	Death Receptor Signaling	35
rs2639654	chr1	169364260	FASLG	FasL	Death Receptor Signaling	35
rs17370527	chr1	169364614	FASLG	FasL	Death Receptor Signaling	35
rs5030772	chr1	169365007	FASLG	FasL	Death Receptor Signaling	35
rs10458360	chr1	169365632	FASLG	FasL	Death Receptor Signaling	35
rs859663	chr1	169369112	FASLG	FasL	Death Receptor Signaling	35
rs975074	chr1	169745424	TNFSF18	TNFSF18	TNF Superfamily Signaling	35
rs2236876	chr1	169749143	TNFSF18	TNFSF18	TNF Superfamily Signaling	35
rs723858	chr1	169749920	TNFSF18	TNFSF18	TNF Superfamily Signaling	35
rs9286880	chr1	169750337	TNFSF18	TNFSF18	TNF Superfamily Signaling	35
rs7537126	chr1	169753006	TNFSF18	TNFSF18	TNF Superfamily Signaling	35
rs7514229	chr1	169885961	TNFSF4	TNFSF4	TNF Superfamily Signaling	35
rs10489270	chr1	169889421	TNFSF4	TNFSF4	TNF Superfamily Signaling	35
rs6661173	chr1	169891940	TNFSF4	TNFSF4	TNF Superfamily Signaling	35
rs10912561	chr1	169896222	TNFSF4	TNFSF4	TNF Superfamily Signaling	35
rs1234313	chr1	169897904	TNFSF4	TNFSF4	TNF Superfamily Signaling	35
rs7519632	chr1	169900150	TNFSF4	TNFSF4	TNF Superfamily Signaling	35
rs3850641	chr1	169907489	TNFSF4	TNFSF4	TNF Superfamily Signaling	35
rs1234314	chr1	169909049	TNFSF4	TNFSF4	TNF Superfamily Signaling	35
rs3861953	chr1	169912045	TNFSF4	TNFSF4	TNF Superfamily Signaling	35
rs2227607	chr1	170612409	SERPINC1	SERPINC1	Complement Cascase	35
rs941989	chr1	170613528	SERPINC1	SERPINC1	Complement Cascase	35
rs2227589	chr1	170617873	SERPINC1	SERPINC1	Complement Cascase	35
rs2227588	chr1	170619100	SERPINC1	SERPINC1	Complement Cascase	35
rs796860	chr1	180256512	NCF2	neutrophil cytosolic factor 2	ROS/Glutathione	35
rs789180	chr1	180257277	NCF2	neutrophil cytosolic factor 2	ROS/Glutathione	35
rs2274064	chr1	180274044	NCF2	neutrophil cytosolic factor 2	ROS/Glutathione	35
rs10911363	chr1	180281414	NCF2	neutrophil cytosolic factor 2	ROS/Glutathione	35
rs3845466	chr1	180283417	NCF2	neutrophil cytosolic factor 2	ROS/Glutathione	35
rs789185	chr1	180285938	NCF2	neutrophil cytosolic factor 2	ROS/Glutathione	35
rs11578964	chr1	180287436	NCF2	neutrophil cytosolic factor 2	ROS/Glutathione	35
rs11588654	chr1	180288052	NCF2	neutrophil cytosolic factor 2	ROS/Glutathione	35
rs10911365	chr1	180290762	NCF2	neutrophil cytosolic factor 2	ROS/Glutathione	35
rs3754515	chr1	180294439	NCF2	neutrophil cytosolic factor 2	ROS/Glutathione	35
rs2206593	chr1	183374086	PTGS2	COX-2 / PTGS2	Eicosanoid Signaling	35
rs4648261	chr1	183380661	PTGS2	COX-2 / PTGS2	Eicosanoid Signaling	35
rs2745557	chr1	183380878	PTGS2	COX-2 / PTGS2	Eicosanoid Signaling	35
rs689466	chr1	183382408	PTGS2	COX-2 / PTGS2	Eicosanoid Signaling	35
rs12042763	chr1	183383533	PTGS2	COX-2 / PTGS2	Eicosanoid Signaling	35
rs4609389	chr1	183386038	PTGS2	COX-2 / PTGS2	Eicosanoid Signaling	35
rs3820185	chr1	183540000	PLA2G4A	cPLA2	ERK/MAPK Signaling	35
rs2076075	chr1	183554941	PLA2G4A	cPLA2	ERK/MAPK Signaling	35
rs6696406	chr1	183559774	PLA2G4A	cPLA2	ERK/MAPK Signaling	35
rs12720497	chr1	183562077	PLA2G4A	cPLA2	ERK/MAPK Signaling	35
rs6685652	chr1	183563385	PLA2G4A	cPLA2	ERK/MAPK Signaling	35
rs10911935	chr1	183565513	PLA2G4A	cPLA2	ERK/MAPK Signaling	35
rs2223307	chr1	183576583	PLA2G4A	cPLA2	ERK/MAPK Signaling	35
rs17591814	chr1	183578255	PLA2G4A	cPLA2	ERK/MAPK Signaling	35
rs17591849	chr1	183579231	PLA2G4A	cPLA2	ERK/MAPK Signaling	35
rs2223309	chr1	183579750	PLA2G4A	cPLA2	ERK/MAPK Signaling	35
rs12746200	chr1	183580843	PLA2G4A	cPLA2	ERK/MAPK Signaling	35
rs10798065	chr1	183582036	PLA2G4A	cPLA2	ERK/MAPK Signaling	35
rs1980444	chr1	183582617	PLA2G4A	cPLA2	ERK/MAPK Signaling	35
rs1980445	chr1	183582693	PLA2G4A	cPLA2	ERK/MAPK Signaling	35
rs17526478	chr1	183582814	PLA2G4A	cPLA2	ERK/MAPK Signaling	35
rs10911946	chr1	183586863	PLA2G4A	cPLA2	ERK/MAPK Signaling	35
rs12749354	chr1	183587905	PLA2G4A	cPLA2	ERK/MAPK Signaling	35
rs12720541	chr1	183601729	PLA2G4A	cPLA2	ERK/MAPK Signaling	35
rs6656909	chr1	183604887	PLA2G4A	cPLA2	ERK/MAPK Signaling	35
rs10798068	chr1	183606665	PLA2G4A	cPLA2	ERK/MAPK Signaling	35
rs6662687	chr1	183611548	PLA2G4A	cPLA2	ERK/MAPK Signaling	35
rs12128551	chr1	183638703	PLA2G4A	cPLA2	ERK/MAPK Signaling	35
rs6683416	chr1	183645484	PLA2G4A	cPLA2	ERK/MAPK Signaling	35
rs11587539	chr1	183646834	PLA2G4A	cPLA2	ERK/MAPK Signaling	35
rs7555140	chr1	183649177	PLA2G4A	cPLA2	ERK/MAPK Signaling	35
rs969357	chr1	183651650	PLA2G4A	cPLA2	ERK/MAPK Signaling	35
rs10489409	chr1	183651771	PLA2G4A	cPLA2	ERK/MAPK Signaling	35
rs932476	chr1	183665212	PLA2G4A	cPLA2	ERK/MAPK Signaling	35
rs2307198	chr1	183678569	PLA2G4A	cPLA2	ERK/MAPK Signaling	35
rs10737277	chr1	183679386	PLA2G4A	cPLA2	ERK/MAPK Signaling	35
rs12720699	chr1	183681486	PLA2G4A	cPLA2	ERK/MAPK Signaling	35
rs4402086	chr1	183684066	PLA2G4A	cPLA2	ERK/MAPK Signaling	35
rs7526089	chr1	183684288	PLA2G4A	cPLA2	ERK/MAPK Signaling	35
rs10489410	chr1	183685852	PLA2G4A	cPLA2	ERK/MAPK Signaling	35
rs2891264	chr1	183687589	PLA2G4A	cPLA2	ERK/MAPK Signaling	35
rs1359062	chr1	189273129	RGS1	RGS1	G-Protein Coupled Receptor Signaling	35
rs10921202	chr1	189278709	RGS1	RGS1	G-Protein Coupled Receptor Signaling	35
rs1923949	chr1	189279367	RGS1	RGS1	G-Protein Coupled Receptor Signaling	35
rs2816306	chr1	189279702	RGS1	RGS1	G-Protein Coupled Receptor Signaling	35
rs16834456	chr1	189282194	RGS1	RGS1	G-Protein Coupled Receptor Signaling	35
rs3753394	chr1	193352574	CFH	HF1	Complement Cascase	35
rs7524776	chr1	193354994	CFH	HF1	Complement Cascase	35
rs800292	chr1	193373890	CFH	HF1	Complement Cascase	35
rs1329423	chr1	193378044	CFH	HF1	Complement Cascase	35
rs16840419	chr1	193383402	CFH	HF1	Complement Cascase	35
rs7529589	chr1	193389936	CFH	HF1	Complement Cascase	35
rs10801555	chr1	193391918	CFH	HF1	Complement Cascase	35
rs10922096	chr1	193394116	CFH	HF1	Complement Cascase	35
rs12041668	chr1	193394704	CFH	HF1	Complement Cascase	35
rs6695321	chr1	193407518	CFH	HF1	Complement Cascase	35
rs10922106	chr1	193423121	CFH	HF1	Complement Cascase	35
rs419137	chr1	193428532	CFH	HF1	Complement Cascase	35
rs395544	chr1	193429929	CFH	HF1	Complement Cascase	35
rs1576340	chr1	193430368	CFH	HF1	Complement Cascase	35
rs424535	chr1	193440880	CFH	HF1	Complement Cascase	35
rs1065489	chr1	193441431	CFH	HF1	Complement Cascase	35
rs16840522	chr1	193442573	CFH	HF1	Complement Cascase	35
rs17610618	chr1	195341565	PTPRC	CD45	Lymphocyte signaling	35
rs1409362	chr1	195350157	PTPRC	CD45	Lymphocyte signaling	35
rs1326272	chr1	195351545	PTPRC	CD45	Lymphocyte signaling	35
rs1326273	chr1	195355956	PTPRC	CD45	Lymphocyte signaling	35
rs3767736	chr1	195356819	PTPRC	CD45	Lymphocyte signaling	35
rs1052238	chr1	195366282	PTPRC	CD45	Lymphocyte signaling	35
rs3767742	chr1	195366654	PTPRC	CD45	Lymphocyte signaling	35
rs1326280	chr1	195384426	PTPRC	CD45	Lymphocyte signaling	35
rs12127625	chr1	195388428	PTPRC	CD45	Lymphocyte signaling	35
rs3767747	chr1	195395759	PTPRC	CD45	Lymphocyte signaling	35
rs16843742	chr1	195403956	PTPRC	CD45	Lymphocyte signaling	35
rs10919557	chr1	195407015	PTPRC	CD45	Lymphocyte signaling	35
rs10800584	chr1	195412624	PTPRC	CD45	Lymphocyte signaling	35
rs12120762	chr1	195431450	PTPRC	CD45	Lymphocyte signaling	35
rs11589894	chr1	195436738	PTPRC	CD45	Lymphocyte signaling	35
rs6427748	chr1	195437102	PTPRC	CD45	Lymphocyte signaling	35
rs17670373	chr1	195454498	PTPRC	CD45	Lymphocyte signaling	35
rs10920336	chr1	198847602	PTPN7	PTPN7	Lymphocyte signaling	35
rs4623766	chr1	198848614	PTPN7	PTPN7	Lymphocyte signaling	35
rs7551879	chr1	198850965	PTPN7	PTPN7	Lymphocyte signaling	35
rs10920337	chr1	198853300	PTPN7	PTPN7	Lymphocyte signaling	35
rs10920338	chr1	198854270	PTPN7	PTPN7	Lymphocyte signaling	35
rs10800816	chr1	198857020	PTPN7	PTPN7	Lymphocyte signaling	35
rs12141644	chr1	198857651	PTPN7	PTPN7	Lymphocyte signaling	35
rs10920345	chr1	198859836	PTPN7	PTPN7	Lymphocyte signaling	35
rs4359077	chr1	198860769	PTPN7	PTPN7	Lymphocyte signaling	35
rs4631763	chr1	198860934	PTPN7	PTPN7	Lymphocyte signaling	35
rs4259724	chr1	198861663	PTPN7	PTPN7	Lymphocyte signaling	35
rs3934648	chr1	198862411	PTPN7	PTPN7	Lymphocyte signaling	35
rs6660999	chr1	198862765	PTPN7	PTPN7	Lymphocyte signaling	35
rs12737056	chr1	198864434	PTPN7	PTPN7	Lymphocyte signaling	35
rs3898276	chr1	199805453	ADORA1		G-Protein Coupled Receptor Signaling	35
rs722915	chr1	199819314	ADORA1		G-Protein Coupled Receptor Signaling	35
rs6427992	chr1	199834220	ADORA1		G-Protein Coupled Receptor Signaling	35
rs12138660	chr1	199834712	ADORA1		G-Protein Coupled Receptor Signaling	35
rs6427993	chr1	199835721	ADORA1		G-Protein Coupled Receptor Signaling	35
rs7549561	chr1	199838047	ADORA1		G-Protein Coupled Receptor Signaling	35
rs10920574	chr1	199841011	ADORA1		G-Protein Coupled Receptor Signaling	35
rs10800901	chr1	199842961	ADORA1		G-Protein Coupled Receptor Signaling	35
rs12130154	chr1	199846305	ADORA1		G-Protein Coupled Receptor Signaling	35
rs17511192	chr1	199851148	ADORA1		G-Protein Coupled Receptor Signaling	35
rs1845466	chr1	199851800	ADORA1		G-Protein Coupled Receptor Signaling	35
rs4423076	chr1	199855494	ADORA1		G-Protein Coupled Receptor Signaling	35
rs11809836	chr1	199859781	ADORA1		G-Protein Coupled Receptor Signaling	35
rs3766556	chr1	199863701	ADORA1		G-Protein Coupled Receptor Signaling	35
rs3766555	chr1	199863964	ADORA1		G-Protein Coupled Receptor Signaling	35
rs3766552	chr1	199864933	ADORA1		G-Protein Coupled Receptor Signaling	35
rs16851020	chr1	199865309	ADORA1		G-Protein Coupled Receptor Signaling	35
rs4950926	chr1	199868323	ADORA1		G-Protein Coupled Receptor Signaling	35
rs1108871	chr1	203072118	RASSF5	RAPL	Leukocyte Extravasation	35
rs12124627	chr1	203075658	RASSF5	RAPL	Leukocyte Extravasation	35
rs6540450	chr1	203094004	RASSF5	RAPL	Leukocyte Extravasation	35
rs4845108	chr1	203094814	RASSF5	RAPL	Leukocyte Extravasation	35
rs7523985	chr1	203097930	RASSF5	RAPL	Leukocyte Extravasation	35
rs9661909	chr1	203103213	RASSF5	RAPL	Leukocyte Extravasation	35
rs11119006	chr1	203108579	RASSF5	RAPL	Leukocyte Extravasation	35
rs12569123	chr1	203116369	RASSF5	RAPL	Leukocyte Extravasation	35
rs10442694	chr1	203121812	RASSF5	RAPL	Leukocyte Extravasation	35
rs2336942	chr1	203124252	RASSF5	RAPL	Leukocyte Extravasation	35
rs7555149	chr1	203130658	RASSF5	RAPL	Leukocyte Extravasation	35
rs7512541	chr1	203136819	RASSF5	RAPL	Leukocyte Extravasation	35
rs6660116	chr1	203137576	RASSF5	RAPL	Leukocyte Extravasation	35
rs9429987	chr1	203138082	RASSF5	RAPL	Leukocyte Extravasation	35
rs12724616	chr1	203145465	RASSF5	RAPL	Leukocyte Extravasation	35
rs7531197	chr1	203148259	RASSF5	RAPL	Leukocyte Extravasation	35
rs11589	chr1	203150333	RASSF5	RAPL	Leukocyte Extravasation	35
rs10863784	chr1	203260179	MAPKAPK2	MAPKAPK2	p38 MAPK Signaling	35
rs17350838	chr1	203262129	MAPKAPK2	MAPKAPK2	p38 MAPK Signaling	35
rs4240844	chr1	203263909	MAPKAPK2	MAPKAPK2	p38 MAPK Signaling	35
rs12060808	chr1	203265732	MAPKAPK2	MAPKAPK2	p38 MAPK Signaling	35
rs4072677	chr1	203267517	MAPKAPK2	MAPKAPK2	p38 MAPK Signaling	35
rs12028997	chr1	203270753	MAPKAPK2	MAPKAPK2	p38 MAPK Signaling	35
rs17014675	chr1	203273733	MAPKAPK2	MAPKAPK2	p38 MAPK Signaling	35
rs12127517	chr1	203273974	MAPKAPK2	MAPKAPK2	p38 MAPK Signaling	35
rs4240847	chr1	203285017	MAPKAPK2	MAPKAPK2	p38 MAPK Signaling	35
rs11119390	chr1	203289777	MAPKAPK2	MAPKAPK2	p38 MAPK Signaling	35
rs7515374	chr1	203296418	MAPKAPK2	MAPKAPK2	p38 MAPK Signaling	35
rs3024505	chr1	203328299	IL10	interleukin 10	Cytokines	35
rs3024498	chr1	203329924	IL10	interleukin 10	Cytokines	35
rs3024496	chr1	203330259	IL10	interleukin 10	Cytokines	35
rs3024509	chr1	203331692	IL10	interleukin 10	Cytokines	35
rs1554286	chr1	203332628	IL10	interleukin 10	Cytokines	35
rs1518111	chr1	203333040	IL10	interleukin 10	Cytokines	35
rs3021094	chr1	203333347	IL10	interleukin 10	Cytokines	35
rs1800894	chr1	203335061	IL10	interleukin 10	Cytokines	35
rs1800890	chr1	203337760	IL10	interleukin 10	Cytokines	35
rs2945417	chr1	203338398	IL10	interleukin 10	Cytokines	35
rs4845143	chr1	203391714	IL19	interleukin 19	Cytokines	35
rs2243156	chr1	203394609	IL19	interleukin 19	Cytokines	35
rs2243173	chr1	203399853	IL19	interleukin 19	Cytokines	35
rs2243176	chr1	203400839	IL19	interleukin 19	Cytokines	35
rs960326	chr1	203403171	IL19	interleukin 19	Cytokines	35
rs2243191	chr1	203404352	IL19	interleukin 19	Cytokines	35
rs1770372	chr1	203424042	IL20	interleukin 20	Cytokines	35
rs1713239	chr1	203425870	IL20	interleukin 20	Cytokines	35
rs2232360	chr1	203429054	IL20	interleukin 20	Cytokines	35
rs1518108	chr1	203431569	IL20	interleukin 20	Cytokines	35
rs1150253	chr1	203459990	IL24	interleukin 24	Cytokines	35
rs12129555	chr1	203489659	PIGR	Poly-Ig receptor	Miscellaneous	35
rs291102	chr1	203494873	PIGR	Poly-Ig receptor	Miscellaneous	35
rs2275531	chr1	203497511	PIGR	Poly-Ig receptor	Miscellaneous	35
rs4844369	chr1	203506623	PIGR	Poly-Ig receptor	Miscellaneous	35
rs1340236	chr1	203511071	PIGR	Poly-Ig receptor	Miscellaneous	35
rs12711513	chr1	203651375	C4BPB	C4BPbeta	Complement Cascase	35
rs2808467	chr1	203662196	C4BPB	C4BPbeta	Complement Cascase	35
rs11120211	chr1	203664774	C4BPA	C4BPalpha	Complement Cascase	35
rs11120218	chr1	203666846	C4BPA	C4BPalpha	Complement Cascase	35
rs17186575	chr1	203673546	C4BPA	C4BPalpha	Complement Cascase	35
rs17186582	chr1	203674026	C4BPA	C4BPalpha	Complement Cascase	35
rs2842704	chr1	203677831	C4BPA	C4BPalpha	Complement Cascase	35
rs4425986	chr1	203682175	C4BPA	C4BPalpha	Complement Cascase	35
rs17021100	chr1	203682402	C4BPA	C4BPalpha	Complement Cascase	35
rs7545083	chr1	203684283	C4BPA	C4BPalpha	Complement Cascase	35
rs1126618	chr1	203686075	C4BPA	C4BPalpha	Complement Cascase	35
rs2491395	chr1	203690118	C4BPA	C4BPalpha	Complement Cascase	35
rs4844573	chr1	203693295	C4BPA	C4BPalpha	Complement Cascase	35
rs12043615	chr1	203702783	C4BPA	C4BPalpha	Complement Cascase	35
rs7544288	chr1	203897417	CD55	DAF	Complement Cascase	35
rs2135923	chr1	203914988	CD55	DAF	Complement Cascase	35
rs7527218	chr1	204012224	CR2	CR2	Complement Cascase	35
rs311312	chr1	204013936	CR2	CR2	Complement Cascase	35
rs3813946	chr1	204016088	CR2	CR2	Complement Cascase	35
rs17044525	chr1	204021191	CR2	CR2	Complement Cascase	35
rs17044576	chr1	204023065	CR2	CR2	Complement Cascase	35
rs1048971	chr1	204034717	CR2	CR2	Complement Cascase	35
rs17615	chr1	204034857	CR2	CR2	Complement Cascase	35
rs4308977	chr1	204035293	CR2	CR2	Complement Cascase	35
rs4328074	chr1	204035318	CR2	CR2	Complement Cascase	35
rs4317805	chr1	204041387	CR2	CR2	Complement Cascase	35
rs12032512	chr1	204041573	CR2	CR2	Complement Cascase	35
rs6540433	chr1	204041790	CR2	CR2	Complement Cascase	35
rs17258996	chr1	204041839	CR2	CR2	Complement Cascase	35
rs6690215	chr1	204044445	CR2	CR2	Complement Cascase	35
rs12021671	chr1	204046540	CR2	CR2	Complement Cascase	35
rs2182913	chr1	204048773	CR2	CR2	Complement Cascase	35
rs7519408	chr1	204049684	CR2	CR2	Complement Cascase	35
rs1410408	chr1	204054703	CR1	CR1	Complement Cascase	35
rs7525160	chr1	204056809	CR1	CR1	Complement Cascase	35
rs9429944	chr1	204058702	CR1	CR1	Complement Cascase	35
rs1986158	chr1	204059139	CR1	CR1	Complement Cascase	35
rs4274065	chr1	204059871	CR1	CR1	Complement Cascase	35
rs2025935	chr1	204064050	CR1	CR1	Complement Cascase	35
rs12567973	chr1	204069896	CR1	CR1	Complement Cascase	35
rs650877	chr1	204137188	CR1	CR1	Complement Cascase	35
rs2274566	chr1	204141740	CR1	CR1	Complement Cascase	35
rs3737002	chr1	204149168	CR1	CR1	Complement Cascase	35
rs17259038	chr1	204162297	CR1	CR1	Complement Cascase	35
rs11118157	chr1	204166714	CR1	CR1	Complement Cascase	35
rs3818361	chr1	204173363	CR1	CR1	Complement Cascase	35
rs6661764	chr1	204196780	CR1	CR1	Complement Cascase	35
rs10494885	chr1	204203584	CR1	CR1	Complement Cascase	35
rs12062235	chr1	204310188	CD46	MCP	Complement Cascase	35
rs2724384	chr1	204318598	CD46	MCP	Complement Cascase	35
rs2796270	chr1	204326007	CD46	MCP	Complement Cascase	35
rs7545126	chr1	204326631	CD46	MCP	Complement Cascase	35
rs11118555	chr1	204329248	CD46	MCP	Complement Cascase	35
rs2796275	chr1	204338885	CD46	MCP	Complement Cascase	35
rs2796278	chr1	204344218	CD46	MCP	Complement Cascase	35
rs859706	chr1	204350665	CD46	MCP	Complement Cascase	35
rs14374	chr1	204356652	CD46	MCP	Complement Cascase	35
rs1210225	chr1	204447066	CD34	CD34	Miscellaneous	35
rs658347	chr1	204447319	CD34	CD34	Miscellaneous	35
rs7572	chr1	204448404	CD34	CD34	Miscellaneous	35
rs2556	chr1	204448754	CD34	CD34	Miscellaneous	35
rs2179634	chr1	204451462	CD34	CD34	Miscellaneous	35
rs1009897	chr1	204451900	CD34	CD34	Miscellaneous	35
rs1973916	chr1	204454381	CD34	CD34	Miscellaneous	35
rs2488250	chr1	204458272	CD34	CD34	Miscellaneous	35
rs3738460	chr1	204459500	CD34	CD34	Miscellaneous	35
rs12029239	chr1	204461021	CD34	CD34	Miscellaneous	35
rs1204682	chr1	204465401	CD34	CD34	Miscellaneous	35
rs1932818	chr1	204466652	CD34	CD34	Miscellaneous	35
rs1555138	chr1	204474495	CD34	CD34	Miscellaneous	35
rs3754171	chr1	204475334	CD34	CD34	Miscellaneous	35
rs2073485	chr1	206351189	IRF6	IRF6	Interferon Signaling	35
rs2235375	chr1	206353982	IRF6	IRF6	Interferon Signaling	35
rs2013196	chr1	206356806	IRF6	IRF6	Interferon Signaling	35
rs2236906	chr1	206359880	IRF6	IRF6	Interferon Signaling	35
rs3753518	chr1	206366359	IRF6	IRF6	Interferon Signaling	35
rs630984	chr1	206370688	IRF6	IRF6	Interferon Signaling	35
rs11119729	chr1	207919724	TRAF5	TRAF5	TNF Superfamily Signaling	35
rs6684874	chr1	207920455	TRAF5	TRAF5	TNF Superfamily Signaling	35
rs17267554	chr1	207928539	TRAF5	TRAF5	TNF Superfamily Signaling	35
rs17017431	chr1	207932089	TRAF5	TRAF5	TNF Superfamily Signaling	35
rs3738199	chr1	207933739	TRAF5	TRAF5	TNF Superfamily Signaling	35
rs3125296	chr1	209166681	ATF3	ATF3	p38 MAPK Signaling	35
rs10735510	chr1	209173855	ATF3	ATF3	p38 MAPK Signaling	35
rs4951629	chr1	209175278	ATF3	ATF3	p38 MAPK Signaling	35
rs11571536	chr1	209175315	ATF3	ATF3	p38 MAPK Signaling	35
rs11571537	chr1	209175420	ATF3	ATF3	p38 MAPK Signaling	35
rs9429889	chr1	209177924	ATF3	ATF3	p38 MAPK Signaling	35
rs12070345	chr1	209178730	ATF3	ATF3	p38 MAPK Signaling	35
rs1126526	chr1	209181900	ATF3	ATF3	p38 MAPK Signaling	35
rs10475	chr1	209182008	ATF3	ATF3	p38 MAPK Signaling	35
rs1126700	chr1	209182244	ATF3	ATF3	p38 MAPK Signaling	35
rs10495098	chr1	214904705	TGFB2	TGF-&beta;	Cytokines	35
rs17047682	chr1	214911420	TGFB2	TGF-&beta;	Cytokines	35
rs11581605	chr1	214912699	TGFB2	TGF-&beta;	Cytokines	35
rs2799097	chr1	214913027	TGFB2	TGF-&beta;	Cytokines	35
rs10482736	chr1	214924213	TGFB2	TGF-&beta;	Cytokines	35
rs17558745	chr1	214936916	TGFB2	TGF-&beta;	Cytokines	35
rs2796817	chr1	214939403	TGFB2	TGF-&beta;	Cytokines	35
rs2799085	chr1	214940850	TGFB2	TGF-&beta;	Cytokines	35
rs3892225	chr1	214941692	TGFB2	TGF-&beta;	Cytokines	35
rs2009112	chr1	214941924	TGFB2	TGF-&beta;	Cytokines	35
rs10482751	chr1	214944692	TGFB2	TGF-&beta;	Cytokines	35
rs4335431	chr1	214946004	TGFB2	TGF-&beta;	Cytokines	35
rs2027567	chr1	214946983	TGFB2	TGF-&beta;	Cytokines	35
rs4846267	chr1	214948560	TGFB2	TGF-&beta;	Cytokines	35
rs2796814	chr1	214949976	TGFB2	TGF-&beta;	Cytokines	35
rs1539399	chr1	214953719	TGFB2	TGF-&beta;	Cytokines	35
rs1317681	chr1	214963597	TGFB2	TGF-&beta;	Cytokines	35
rs1891467	chr1	214968380	TGFB2	TGF-&beta;	Cytokines	35
rs17047804	chr1	214971173	TGFB2	TGF-&beta;	Cytokines	35
rs2796822	chr1	214974527	TGFB2	TGF-&beta;	Cytokines	35
rs2796823	chr1	214974609	TGFB2	TGF-&beta;	Cytokines	35
rs4846480	chr1	214986864	TGFB2	TGF-&beta;	Cytokines	35
rs1890994	chr1	214993104	TGFB2	TGF-&beta;	Cytokines	35
rs10482810	chr1	214995927	TGFB2	TGF-&beta;	Cytokines	35
rs2798631	chr1	215000273	TGFB2	TGF-&beta;	Cytokines	35
rs1338076	chr1	218261195	DUSP10	MKP5	p38 MAPK Signaling	35
rs2378455	chr1	218262888	DUSP10	MKP5	p38 MAPK Signaling	35
rs908858	chr1	218271620	DUSP10	MKP5	p38 MAPK Signaling	35
rs12749729	chr1	218271891	DUSP10	MKP5	p38 MAPK Signaling	35
rs11118832	chr1	218272766	DUSP10	MKP5	p38 MAPK Signaling	35
rs6670514	chr1	218281060	DUSP10	MKP5	p38 MAPK Signaling	35
rs11118838	chr1	218285741	DUSP10	MKP5	p38 MAPK Signaling	35
rs12091463	chr1	218287178	DUSP10	MKP5	p38 MAPK Signaling	35
rs17490808	chr1	218287750	DUSP10	MKP5	p38 MAPK Signaling	35
rs6604668	chr1	218290019	DUSP10	MKP5	p38 MAPK Signaling	35
rs6693577	chr1	218290788	DUSP10	MKP5	p38 MAPK Signaling	35
rs6689705	chr1	218293010	DUSP10	MKP5	p38 MAPK Signaling	35
rs6679673	chr1	218294790	DUSP10	MKP5	p38 MAPK Signaling	35
rs4585986	chr1	218294997	DUSP10	MKP5	p38 MAPK Signaling	35
rs10863651	chr1	218297588	DUSP10	MKP5	p38 MAPK Signaling	35
rs4846349	chr1	218300412	DUSP10	MKP5	p38 MAPK Signaling	35
rs1141714	chr1	218300756	DUSP10	MKP5	p38 MAPK Signaling	35
rs1136448	chr1	218301203	DUSP10	MKP5	p38 MAPK Signaling	35
rs3922386	chr1	218302481	DUSP10	MKP5	p38 MAPK Signaling	35
rs4601596	chr1	218302853	DUSP10	MKP5	p38 MAPK Signaling	35
rs11118846	chr1	218307092	DUSP10	MKP5	p38 MAPK Signaling	35
rs2040103	chr1	220208477	CAPN2	Calpain 2, large subunit	Apoptosis Signaling	35
rs10495217	chr1	220211755	CAPN2	Calpain 2, large subunit	Apoptosis Signaling	35
rs12128409	chr1	220216129	CAPN2	Calpain 2, large subunit	Apoptosis Signaling	35
rs12754142	chr1	220235821	CAPN2	Calpain 2, large subunit	Apoptosis Signaling	35
rs751609	chr1	220237482	CAPN2	Calpain 2, large subunit	Apoptosis Signaling	35
rs751128	chr1	220258576	CAPN2	Calpain 2, large subunit	Apoptosis Signaling	35
rs1222153	chr1	220260205	CAPN2	Calpain 2, large subunit	Apoptosis Signaling	35
rs3738372	chr1	220260815	CAPN2	Calpain 2, large subunit	Apoptosis Signaling	35
rs1153950	chr1	220266531	CAPN2	Calpain 2, large subunit	Apoptosis Signaling	35
rs1153947	chr1	220267271	CAPN2	Calpain 2, large subunit	Apoptosis Signaling	35
rs12757286	chr1	220270861	CAPN2	Calpain 2, large subunit	Apoptosis Signaling	35
rs2271347	chr1	222856233	PARP1	PARP	Apoptosis Signaling	35
rs1136410	chr1	222862037	PARP1	PARP	Apoptosis Signaling	35
rs3219123	chr1	222862083	PARP1	PARP	Apoptosis Signaling	35
rs1805401	chr1	222868847	PARP1	PARP	Apoptosis Signaling	35
rs3219049	chr1	222882862	PARP1	PARP	Apoptosis Signaling	35
rs2048424	chr1	222889742	PARP1	PARP	Apoptosis Signaling	35
rs7542788	chr1	222892038	PARP1	PARP	Apoptosis Signaling	35
rs9426553	chr1	223751439	MENA	ENAH	Cytoskeleton-motility	35
rs7526283	chr1	223753663	MENA	ENAH	Cytoskeleton-motility	35
rs1513617	chr1	223753948	MENA	ENAH	Cytoskeleton-motility	35
rs12038272	chr1	223756879	MENA	ENAH	Cytoskeleton-motility	35
rs16847561	chr1	223776284	MENA	ENAH	Cytoskeleton-motility	35
rs7540055	chr1	223784177	MENA	ENAH	Cytoskeleton-motility	35
rs7540155	chr1	223784272	MENA	ENAH	Cytoskeleton-motility	35
rs4653815	chr1	223787898	MENA	ENAH	Cytoskeleton-motility	35
rs7512409	chr1	223790773	MENA	ENAH	Cytoskeleton-motility	35
rs7519121	chr1	223793168	MENA	ENAH	Cytoskeleton-motility	35
rs12746316	chr1	223794129	MENA	ENAH	Cytoskeleton-motility	35
rs4500280	chr1	223801711	MENA	ENAH	Cytoskeleton-motility	35
rs10495254	chr1	223802588	MENA	ENAH	Cytoskeleton-motility	35
rs6660043	chr1	223803173	MENA	ENAH	Cytoskeleton-motility	35
rs10916122	chr1	223819768	MENA	ENAH	Cytoskeleton-motility	35
rs4653827	chr1	223822735	MENA	ENAH	Cytoskeleton-motility	35
rs2953638	chr1	223827327	MENA	ENAH	Cytoskeleton-motility	35
rs3125123	chr1	223836021	MENA	ENAH	Cytoskeleton-motility	35
rs3014263	chr1	223838004	MENA	ENAH	Cytoskeleton-motility	35
rs3014269	chr1	223845940	MENA	ENAH	Cytoskeleton-motility	35
rs4075861	chr1	223849546	MENA	ENAH	Cytoskeleton-motility	35
rs4653498	chr1	223850169	MENA	ENAH	Cytoskeleton-motility	35
rs3014252	chr1	223854283	MENA	ENAH	Cytoskeleton-motility	35
rs3014253	chr1	223855234	MENA	ENAH	Cytoskeleton-motility	35
rs3014267	chr1	223859652	MENA	ENAH	Cytoskeleton-motility	35
rs2953655	chr1	223860906	MENA	ENAH	Cytoskeleton-motility	35
rs10916130	chr1	223864877	MENA	ENAH	Cytoskeleton-motility	35
rs7547204	chr1	223867644	MENA	ENAH	Cytoskeleton-motility	35
rs10916131	chr1	223869861	MENA	ENAH	Cytoskeleton-motility	35
rs10916132	chr1	223871207	MENA	ENAH	Cytoskeleton-motility	35
rs10916133	chr1	223872402	MENA	ENAH	Cytoskeleton-motility	35
rs10916134	chr1	223872869	MENA	ENAH	Cytoskeleton-motility	35
rs4606283	chr1	223887752	MENA	ENAH	Cytoskeleton-motility	35
rs10799414	chr1	223889768	MENA	ENAH	Cytoskeleton-motility	35
rs6670351	chr1	223892718	MENA	ENAH	Cytoskeleton-motility	35
rs12025958	chr1	223898356	MENA	ENAH	Cytoskeleton-motility	35
rs4601553	chr1	223902701	MENA	ENAH	Cytoskeleton-motility	35
rs12408981	chr1	223903015	MENA	ENAH	Cytoskeleton-motility	35
rs3000780	chr1	223904231	MENA	ENAH	Cytoskeleton-motility	35
rs3000786	chr1	223905501	MENA	ENAH	Cytoskeleton-motility	35
rs3000789	chr1	223905749	MENA	ENAH	Cytoskeleton-motility	35
rs3000790	chr1	223905814	MENA	ENAH	Cytoskeleton-motility	35
rs3000791	chr1	223905909	MENA	ENAH	Cytoskeleton-motility	35
rs12724703	chr1	223909075	MENA	ENAH	Cytoskeleton-motility	35
rs10916142	chr1	223909751	MENA	ENAH	Cytoskeleton-motility	35
rs1417121	chr1	239995391	AKT3	AKT	PI3K/AKT Signaling	35
rs12045585	chr1	239999140	AKT3	AKT	PI3K/AKT Signaling	35
rs4515770	chr1	240012954	AKT3	AKT	PI3K/AKT Signaling	35
rs7523742	chr1	240014191	AKT3	AKT	PI3K/AKT Signaling	35
rs10927035	chr1	240030023	AKT3	AKT	PI3K/AKT Signaling	35
rs1121276	chr1	240036448	AKT3	AKT	PI3K/AKT Signaling	35
rs320330	chr1	240124249	AKT3	AKT	PI3K/AKT Signaling	35
rs10927046	chr1	240127231	AKT3	AKT	PI3K/AKT Signaling	35
rs1486472	chr1	240129755	AKT3	AKT	PI3K/AKT Signaling	35
rs7517921	chr1	240182461	AKT3	AKT	PI3K/AKT Signaling	35
rs2125229	chr1	240203689	AKT3	AKT	PI3K/AKT Signaling	35
rs12144546	chr1	240209918	AKT3	AKT	PI3K/AKT Signaling	35
rs2125230	chr1	240211889	AKT3	AKT	PI3K/AKT Signaling	35
rs10925013	chr1	243903120	CIAS1	CIAS1	CARD	35
rs2027432	chr1	243904482	CIAS1	CIAS1	CARD	35
rs4925648	chr1	243906609	CIAS1	CIAS1	CARD	35
rs12137901	chr1	243907250	CIAS1	CIAS1	CARD	35
rs10925015	chr1	243909718	CIAS1	CIAS1	CARD	35
rs10754555	chr1	243910684	CIAS1	CIAS1	CARD	35
rs947181	chr1	243911254	CIAS1	CIAS1	CARD	35
rs3806265	chr1	243912377	CIAS1	CIAS1	CARD	35
rs7525979	chr1	243913449	CIAS1	CIAS1	CARD	35
rs3806268	chr1	243913518	CIAS1	CIAS1	CARD	35
rs3738447	chr1	243915001	CIAS1	CIAS1	CARD	35
rs12062001	chr1	243920555	CIAS1	CIAS1	CARD	35
rs10925019	chr1	243921891	CIAS1	CIAS1	CARD	35
rs4925654	chr1	243922098	CIAS1	CIAS1	CARD	35
rs10754557	chr1	243925273	CIAS1	CIAS1	CARD	35
rs1539019	chr1	243926342	CIAS1	CIAS1	CARD	35
rs4925546	chr1	243929009	CIAS1	CIAS1	CARD	35
rs4925659	chr1	243929504	CIAS1	CIAS1	CARD	35
rs12130711	chr1	243933683	CIAS1	CIAS1	CARD	35
rs10802501	chr1	243938243	CIAS1	CIAS1	CARD	35
rs10733112	chr1	243939929	CIAS1	CIAS1	CARD	35
rs12070953	chr1	243940427	CIAS1	CIAS1	CARD	35
rs1937849	chr10	5123839	AKR1C3	PGFS	Eicosanoid Signaling	35
rs11252934	chr10	5124416	AKR1C3	PGFS	Eicosanoid Signaling	35
rs12529	chr10	5126651	AKR1C3	PGFS	Eicosanoid Signaling	35
rs17396032	chr10	5127846	AKR1C3	PGFS	Eicosanoid Signaling	35
rs2298305	chr10	5129886	AKR1C3	PGFS	Eicosanoid Signaling	35
rs4559587	chr10	5132855	AKR1C3	PGFS	Eicosanoid Signaling	35
rs10904418	chr10	5133548	AKR1C3	PGFS	Eicosanoid Signaling	35
rs12775701	chr10	5135178	AKR1C3	PGFS	Eicosanoid Signaling	35
rs11252945	chr10	5136488	AKR1C3	PGFS	Eicosanoid Signaling	35
rs4242785	chr10	5139144	AKR1C3	PGFS	Eicosanoid Signaling	35
rs3209896	chr10	5139703	AKR1C3	PGFS	Eicosanoid Signaling	35
rs10904423	chr10	5141310	AKR1C3	PGFS	Eicosanoid Signaling	35
rs7086771	chr10	5141817	AKR1C3	PGFS	Eicosanoid Signaling	35
rs17146980	chr10	6032550	IL15RA	IL15Ralpha	Cytokines	35
rs2296135	chr10	6034700	IL15RA	IL15Ralpha	Cytokines	35
rs8177734	chr10	6036625	IL15RA	IL15Ralpha	Cytokines	35
rs8177726	chr10	6037747	IL15RA	IL15Ralpha	Cytokines	35
rs3136630	chr10	6037826	IL15RA	IL15Ralpha	Cytokines	35
rs2296140	chr10	6038702	IL15RA	IL15Ralpha	Cytokines	35
rs3136621	chr10	6041415	IL15RA	IL15Ralpha	Cytokines	35
rs3136620	chr10	6041448	IL15RA	IL15Ralpha	Cytokines	35
rs3136619	chr10	6041489	IL15RA	IL15Ralpha	Cytokines	35
rs2228059	chr10	6042374	IL15RA	IL15Ralpha	Cytokines	35
rs11574674	chr10	6043457	IL15RA	IL15Ralpha	Cytokines	35
rs8177694	chr10	6043841	IL15RA	IL15Ralpha	Cytokines	35
rs8177692	chr10	6044018	IL15RA	IL15Ralpha	Cytokines	35
rs3136615	chr10	6045516	IL15RA	IL15Ralpha	Cytokines	35
rs3136614	chr10	6045680	IL15RA	IL15Ralpha	Cytokines	35
rs8177688	chr10	6047555	IL15RA	IL15Ralpha	Cytokines	35
rs3181148	chr10	6048036	IL15RA	IL15Ralpha	Cytokines	35
rs7910212	chr10	6049132	IL15RA	IL15Ralpha	Cytokines	35
rs8177676	chr10	6050633	IL15RA	IL15Ralpha	Cytokines	35
rs8177664	chr10	6053311	IL15RA	IL15Ralpha	Cytokines	35
rs3736862	chr10	6054278	IL15RA	IL15Ralpha	Cytokines	35
rs8177655	chr10	6055125	IL15RA	IL15Ralpha	Cytokines	35
rs7394285	chr10	6064319	IL15RA	IL15Ralpha	Cytokines	35
rs12358260	chr10	6064337	IL15RA	IL15Ralpha	Cytokines	35
rs8177600	chr10	6065069	IL15RA	IL15Ralpha	Cytokines	35
rs12722608	chr10	6092847	IL2RA	interleukin 2 receptor, alpha	Cytokines	35
rs12722605	chr10	6093169	IL2RA	interleukin 2 receptor, alpha	Cytokines	35
rs12244380	chr10	6093380	IL2RA	interleukin 2 receptor, alpha	Cytokines	35
rs9663421	chr10	6095610	IL2RA	interleukin 2 receptor, alpha	Cytokines	35
rs12722596	chr10	6096300	IL2RA	interleukin 2 receptor, alpha	Cytokines	35
rs2386841	chr10	6097738	IL2RA	interleukin 2 receptor, alpha	Cytokines	35
rs7899538	chr10	6099904	IL2RA	interleukin 2 receptor, alpha	Cytokines	35
rs2274037	chr10	6102114	IL2RA	interleukin 2 receptor, alpha	Cytokines	35
rs2076846	chr10	6103259	IL2RA	interleukin 2 receptor, alpha	Cytokines	35
rs7093069	chr10	6103325	IL2RA	interleukin 2 receptor, alpha	Cytokines	35
rs11596355	chr10	6104187	IL2RA	interleukin 2 receptor, alpha	Cytokines	35
rs7900744	chr10	6105617	IL2RA	interleukin 2 receptor, alpha	Cytokines	35
rs2031229	chr10	6106574	IL2RA	interleukin 2 receptor, alpha	Cytokines	35
rs12722563	chr10	6109567	IL2RA	interleukin 2 receptor, alpha	Cytokines	35
rs6602391	chr10	6118038	IL2RA	interleukin 2 receptor, alpha	Cytokines	35
rs6602392	chr10	6118085	IL2RA	interleukin 2 receptor, alpha	Cytokines	35
rs7072398	chr10	6119852	IL2RA	interleukin 2 receptor, alpha	Cytokines	35
rs11256456	chr10	6120718	IL2RA	interleukin 2 receptor, alpha	Cytokines	35
rs11256457	chr10	6120800	IL2RA	interleukin 2 receptor, alpha	Cytokines	35
rs4749924	chr10	6122402	IL2RA	interleukin 2 receptor, alpha	Cytokines	35
rs706781	chr10	6126391	IL2RA	interleukin 2 receptor, alpha	Cytokines	35
rs706780	chr10	6127032	IL2RA	interleukin 2 receptor, alpha	Cytokines	35
rs11256497	chr10	6127800	IL2RA	interleukin 2 receptor, alpha	Cytokines	35
rs791587	chr10	6128705	IL2RA	interleukin 2 receptor, alpha	Cytokines	35
rs791589	chr10	6129577	IL2RA	interleukin 2 receptor, alpha	Cytokines	35
rs791590	chr10	6130328	IL2RA	interleukin 2 receptor, alpha	Cytokines	35
rs2476491	chr10	6135416	IL2RA	interleukin 2 receptor, alpha	Cytokines	35
rs706779	chr10	6138830	IL2RA	interleukin 2 receptor, alpha	Cytokines	35
rs2104286	chr10	6139051	IL2RA	interleukin 2 receptor, alpha	Cytokines	35
rs3118470	chr10	6141719	IL2RA	interleukin 2 receptor, alpha	Cytokines	35
rs12722486	chr10	6143768	IL2RA	interleukin 2 receptor, alpha	Cytokines	35
rs7073236	chr10	6146558	IL2RA	interleukin 2 receptor, alpha	Cytokines	35
rs4147359	chr10	6148445	IL2RA	interleukin 2 receptor, alpha	Cytokines	35
rs7082071	chr10	6510593	PRKCQ	PKCtheta	ERK/MAPK Signaling	35
rs17299670	chr10	6511000	PRKCQ	PKCtheta	ERK/MAPK Signaling	35
rs631968	chr10	6515302	PRKCQ	PKCtheta	ERK/MAPK Signaling	35
rs10906557	chr10	6515704	PRKCQ	PKCtheta	ERK/MAPK Signaling	35
rs590467	chr10	6516741	PRKCQ	PKCtheta	ERK/MAPK Signaling	35
rs944715	chr10	6519162	PRKCQ	PKCtheta	ERK/MAPK Signaling	35
rs12358161	chr10	6521233	PRKCQ	PKCtheta	ERK/MAPK Signaling	35
rs624016	chr10	6526617	PRKCQ	PKCtheta	ERK/MAPK Signaling	35
rs6602705	chr10	6527434	PRKCQ	PKCtheta	ERK/MAPK Signaling	35
rs688391	chr10	6529658	PRKCQ	PKCtheta	ERK/MAPK Signaling	35
rs4750470	chr10	6530764	PRKCQ	PKCtheta	ERK/MAPK Signaling	35
rs10508307	chr10	6537313	PRKCQ	PKCtheta	ERK/MAPK Signaling	35
rs11816284	chr10	6542852	PRKCQ	PKCtheta	ERK/MAPK Signaling	35
rs618020	chr10	6543456	PRKCQ	PKCtheta	ERK/MAPK Signaling	35
rs4364968	chr10	6543737	PRKCQ	PKCtheta	ERK/MAPK Signaling	35
rs630516	chr10	6546953	PRKCQ	PKCtheta	ERK/MAPK Signaling	35
rs2026432	chr10	6547609	PRKCQ	PKCtheta	ERK/MAPK Signaling	35
rs2026431	chr10	6550460	PRKCQ	PKCtheta	ERK/MAPK Signaling	35
rs7080157	chr10	6552565	PRKCQ	PKCtheta	ERK/MAPK Signaling	35
rs12220818	chr10	6557482	PRKCQ	PKCtheta	ERK/MAPK Signaling	35
rs4750517	chr10	6560464	PRKCQ	PKCtheta	ERK/MAPK Signaling	35
rs7083579	chr10	6560590	PRKCQ	PKCtheta	ERK/MAPK Signaling	35
rs643610	chr10	6561153	PRKCQ	PKCtheta	ERK/MAPK Signaling	35
rs11259097	chr10	6561540	PRKCQ	PKCtheta	ERK/MAPK Signaling	35
rs3793730	chr10	6562704	PRKCQ	PKCtheta	ERK/MAPK Signaling	35
rs501878	chr10	6566503	PRKCQ	PKCtheta	ERK/MAPK Signaling	35
rs2236379	chr10	6567149	PRKCQ	PKCtheta	ERK/MAPK Signaling	35
rs790815	chr10	6570058	PRKCQ	PKCtheta	ERK/MAPK Signaling	35
rs587198	chr10	6571155	PRKCQ	PKCtheta	ERK/MAPK Signaling	35
rs584507	chr10	6571756	PRKCQ	PKCtheta	ERK/MAPK Signaling	35
rs472317	chr10	6572184	PRKCQ	PKCtheta	ERK/MAPK Signaling	35
rs3815975	chr10	6573883	PRKCQ	PKCtheta	ERK/MAPK Signaling	35
rs4750531	chr10	6574390	PRKCQ	PKCtheta	ERK/MAPK Signaling	35
rs647934	chr10	6574734	PRKCQ	PKCtheta	ERK/MAPK Signaling	35
rs6602745	chr10	6576558	PRKCQ	PKCtheta	ERK/MAPK Signaling	35
rs11259211	chr10	6577043	PRKCQ	PKCtheta	ERK/MAPK Signaling	35
rs650652	chr10	6580729	PRKCQ	PKCtheta	ERK/MAPK Signaling	35
rs1409876	chr10	6583069	PRKCQ	PKCtheta	ERK/MAPK Signaling	35
rs510745	chr10	6585110	PRKCQ	PKCtheta	ERK/MAPK Signaling	35
rs500766	chr10	6590596	PRKCQ	PKCtheta	ERK/MAPK Signaling	35
rs7087802	chr10	6591738	PRKCQ	PKCtheta	ERK/MAPK Signaling	35
rs17555072	chr10	6593077	PRKCQ	PKCtheta	ERK/MAPK Signaling	35
rs17137421	chr10	6596498	PRKCQ	PKCtheta	ERK/MAPK Signaling	35
rs506989	chr10	6600708	PRKCQ	PKCtheta	ERK/MAPK Signaling	35
rs606289	chr10	6601253	PRKCQ	PKCtheta	ERK/MAPK Signaling	35
rs4357599	chr10	6606981	PRKCQ	PKCtheta	ERK/MAPK Signaling	35
rs4750565	chr10	6608207	PRKCQ	PKCtheta	ERK/MAPK Signaling	35
rs11259403	chr10	6612231	PRKCQ	PKCtheta	ERK/MAPK Signaling	35
rs7914917	chr10	6615959	PRKCQ	PKCtheta	ERK/MAPK Signaling	35
rs4748127	chr10	6616887	PRKCQ	PKCtheta	ERK/MAPK Signaling	35
rs11259432	chr10	6618634	PRKCQ	PKCtheta	ERK/MAPK Signaling	35
rs6602820	chr10	6636248	PRKCQ	PKCtheta	ERK/MAPK Signaling	35
rs7100152	chr10	6647064	PRKCQ	PKCtheta	ERK/MAPK Signaling	35
rs7072496	chr10	6648319	PRKCQ	PKCtheta	ERK/MAPK Signaling	35
rs4620621	chr10	6656342	PRKCQ	PKCtheta	ERK/MAPK Signaling	35
rs943451	chr10	6661779	PRKCQ	PKCtheta	ERK/MAPK Signaling	35
rs501764	chr10	8133040	GATA3	GATA-3	Cytokines	35
rs556960	chr10	8134152	GATA3	GATA-3	Cytokines	35
rs2275806	chr10	8135346	GATA3	GATA-3	Cytokines	35
rs1399180	chr10	8138725	GATA3	GATA-3	Cytokines	35
rs3781093	chr10	8141933	GATA3	GATA-3	Cytokines	35
rs376397	chr10	8143304	GATA3	GATA-3	Cytokines	35
rs3824662	chr10	8144214	GATA3	GATA-3	Cytokines	35
rs3781092	chr10	8146359	GATA3	GATA-3	Cytokines	35
rs3802600	chr10	8148818	GATA3	GATA-3	Cytokines	35
rs528778	chr10	8152149	GATA3	GATA-3	Cytokines	35
rs263418	chr10	8158197	GATA3	GATA-3	Cytokines	35
rs2997063	chr10	12429186	CAMK1D	CaMK I	Calcium Signaling	35
rs2801499	chr10	12436016	CAMK1D	CaMK I	Calcium Signaling	35
rs7909593	chr10	12442472	CAMK1D	CaMK I	Calcium Signaling	35
rs2997068	chr10	12442707	CAMK1D	CaMK I	Calcium Signaling	35
rs17151584	chr10	12443034	CAMK1D	CaMK I	Calcium Signaling	35
rs10906139	chr10	12452342	CAMK1D	CaMK I	Calcium Signaling	35
rs2724778	chr10	12458537	CAMK1D	CaMK I	Calcium Signaling	35
rs4451621	chr10	12471373	CAMK1D	CaMK I	Calcium Signaling	35
rs11257763	chr10	12472725	CAMK1D	CaMK I	Calcium Signaling	35
rs7073375	chr10	12473948	CAMK1D	CaMK I	Calcium Signaling	35
rs11257765	chr10	12474748	CAMK1D	CaMK I	Calcium Signaling	35
rs4747981	chr10	12475365	CAMK1D	CaMK I	Calcium Signaling	35
rs11592475	chr10	12480215	CAMK1D	CaMK I	Calcium Signaling	35
rs12254030	chr10	12488094	CAMK1D	CaMK I	Calcium Signaling	35
rs11257774	chr10	12488157	CAMK1D	CaMK I	Calcium Signaling	35
rs2801483	chr10	12499425	CAMK1D	CaMK I	Calcium Signaling	35
rs11592149	chr10	12507234	CAMK1D	CaMK I	Calcium Signaling	35
rs1125791	chr10	12515843	CAMK1D	CaMK I	Calcium Signaling	35
rs2768361	chr10	12522601	CAMK1D	CaMK I	Calcium Signaling	35
rs2986651	chr10	12523904	CAMK1D	CaMK I	Calcium Signaling	35
rs7086679	chr10	12525132	CAMK1D	CaMK I	Calcium Signaling	35
rs6602588	chr10	12528002	CAMK1D	CaMK I	Calcium Signaling	35
rs11596121	chr10	12531335	CAMK1D	CaMK I	Calcium Signaling	35
rs1077685	chr10	12532385	CAMK1D	CaMK I	Calcium Signaling	35
rs7901627	chr10	12532480	CAMK1D	CaMK I	Calcium Signaling	35
rs2724816	chr10	12532873	CAMK1D	CaMK I	Calcium Signaling	35
rs2768469	chr10	12532947	CAMK1D	CaMK I	Calcium Signaling	35
rs11257804	chr10	12536061	CAMK1D	CaMK I	Calcium Signaling	35
rs1108131	chr10	12537753	CAMK1D	CaMK I	Calcium Signaling	35
rs2768367	chr10	12537776	CAMK1D	CaMK I	Calcium Signaling	35
rs11257807	chr10	12544075	CAMK1D	CaMK I	Calcium Signaling	35
rs7900824	chr10	12552275	CAMK1D	CaMK I	Calcium Signaling	35
rs11591303	chr10	12555246	CAMK1D	CaMK I	Calcium Signaling	35
rs4620627	chr10	12557897	CAMK1D	CaMK I	Calcium Signaling	35
rs1536531	chr10	12562150	CAMK1D	CaMK I	Calcium Signaling	35
rs12764478	chr10	12564935	CAMK1D	CaMK I	Calcium Signaling	35
rs2768430	chr10	12565108	CAMK1D	CaMK I	Calcium Signaling	35
rs2768431	chr10	12567873	CAMK1D	CaMK I	Calcium Signaling	35
rs10906156	chr10	12569201	CAMK1D	CaMK I	Calcium Signaling	35
rs4532925	chr10	12578363	CAMK1D	CaMK I	Calcium Signaling	35
rs2768444	chr10	12582535	CAMK1D	CaMK I	Calcium Signaling	35
rs6602592	chr10	12583135	CAMK1D	CaMK I	Calcium Signaling	35
rs2815664	chr10	12583735	CAMK1D	CaMK I	Calcium Signaling	35
rs11257835	chr10	12584858	CAMK1D	CaMK I	Calcium Signaling	35
rs7911448	chr10	12593004	CAMK1D	CaMK I	Calcium Signaling	35
rs1111059	chr10	12595447	CAMK1D	CaMK I	Calcium Signaling	35
rs2768461	chr10	12610208	CAMK1D	CaMK I	Calcium Signaling	35
rs12356332	chr10	12610518	CAMK1D	CaMK I	Calcium Signaling	35
rs10906162	chr10	12612502	CAMK1D	CaMK I	Calcium Signaling	35
rs2768463	chr10	12613112	CAMK1D	CaMK I	Calcium Signaling	35
rs7910874	chr10	12622695	CAMK1D	CaMK I	Calcium Signaling	35
rs1126368	chr10	12623259	CAMK1D	CaMK I	Calcium Signaling	35
rs17493316	chr10	12626943	CAMK1D	CaMK I	Calcium Signaling	35
rs4750233	chr10	12628424	CAMK1D	CaMK I	Calcium Signaling	35
rs2815634	chr10	12629770	CAMK1D	CaMK I	Calcium Signaling	35
rs1115520	chr10	12629942	CAMK1D	CaMK I	Calcium Signaling	35
rs7897059	chr10	12631718	CAMK1D	CaMK I	Calcium Signaling	35
rs2768340	chr10	12634442	CAMK1D	CaMK I	Calcium Signaling	35
rs2895524	chr10	12635153	CAMK1D	CaMK I	Calcium Signaling	35
rs1077746	chr10	12635549	CAMK1D	CaMK I	Calcium Signaling	35
rs11592529	chr10	12635821	CAMK1D	CaMK I	Calcium Signaling	35
rs1571206	chr10	12636950	CAMK1D	CaMK I	Calcium Signaling	35
rs2815628	chr10	12637439	CAMK1D	CaMK I	Calcium Signaling	35
rs10906166	chr10	12637464	CAMK1D	CaMK I	Calcium Signaling	35
rs12569857	chr10	12637887	CAMK1D	CaMK I	Calcium Signaling	35
rs2768344	chr10	12638384	CAMK1D	CaMK I	Calcium Signaling	35
rs2768346	chr10	12638726	CAMK1D	CaMK I	Calcium Signaling	35
rs2815624	chr10	12639700	CAMK1D	CaMK I	Calcium Signaling	35
rs2648708	chr10	12641445	CAMK1D	CaMK I	Calcium Signaling	35
rs12773063	chr10	12641479	CAMK1D	CaMK I	Calcium Signaling	35
rs1409961	chr10	12648682	CAMK1D	CaMK I	Calcium Signaling	35
rs7071111	chr10	12661246	CAMK1D	CaMK I	Calcium Signaling	35
rs17494256	chr10	12662751	CAMK1D	CaMK I	Calcium Signaling	35
rs11257903	chr10	12664080	CAMK1D	CaMK I	Calcium Signaling	35
rs11257908	chr10	12669342	CAMK1D	CaMK I	Calcium Signaling	35
rs4638198	chr10	12669374	CAMK1D	CaMK I	Calcium Signaling	35
rs7093225	chr10	12671639	CAMK1D	CaMK I	Calcium Signaling	35
rs2399880	chr10	12672162	CAMK1D	CaMK I	Calcium Signaling	35
rs11257913	chr10	12678153	CAMK1D	CaMK I	Calcium Signaling	35
rs10906179	chr10	12678266	CAMK1D	CaMK I	Calcium Signaling	35
rs7911208	chr10	12680803	CAMK1D	CaMK I	Calcium Signaling	35
rs2399874	chr10	12681241	CAMK1D	CaMK I	Calcium Signaling	35
rs4294481	chr10	12683934	CAMK1D	CaMK I	Calcium Signaling	35
rs12414386	chr10	12684586	CAMK1D	CaMK I	Calcium Signaling	35
rs879753	chr10	12695806	CAMK1D	CaMK I	Calcium Signaling	35
rs4480437	chr10	12711892	CAMK1D	CaMK I	Calcium Signaling	35
rs10906188	chr10	12714077	CAMK1D	CaMK I	Calcium Signaling	35
rs10906191	chr10	12720789	CAMK1D	CaMK I	Calcium Signaling	35
rs17580343	chr10	12721119	CAMK1D	CaMK I	Calcium Signaling	35
rs10450540	chr10	12722851	CAMK1D	CaMK I	Calcium Signaling	35
rs11257928	chr10	12724206	CAMK1D	CaMK I	Calcium Signaling	35
rs7098099	chr10	12725385	CAMK1D	CaMK I	Calcium Signaling	35
rs17495691	chr10	12731582	CAMK1D	CaMK I	Calcium Signaling	35
rs11257930	chr10	12736126	CAMK1D	CaMK I	Calcium Signaling	35
rs10906196	chr10	12736153	CAMK1D	CaMK I	Calcium Signaling	35
rs11257933	chr10	12742074	CAMK1D	CaMK I	Calcium Signaling	35
rs10508445	chr10	12742824	CAMK1D	CaMK I	Calcium Signaling	35
rs10752271	chr10	12744197	CAMK1D	CaMK I	Calcium Signaling	35
rs4417163	chr10	12746743	CAMK1D	CaMK I	Calcium Signaling	35
rs10906199	chr10	12747804	CAMK1D	CaMK I	Calcium Signaling	35
rs7091959	chr10	12749730	CAMK1D	CaMK I	Calcium Signaling	35
rs12251362	chr10	12754275	CAMK1D	CaMK I	Calcium Signaling	35
rs11257936	chr10	12763707	CAMK1D	CaMK I	Calcium Signaling	35
rs7094047	chr10	12782600	CAMK1D	CaMK I	Calcium Signaling	35
rs2399864	chr10	12783648	CAMK1D	CaMK I	Calcium Signaling	35
rs10906212	chr10	12796155	CAMK1D	CaMK I	Calcium Signaling	35
rs7077423	chr10	12811686	CAMK1D	CaMK I	Calcium Signaling	35
rs12570883	chr10	12829682	CAMK1D	CaMK I	Calcium Signaling	35
rs4335437	chr10	12836929	CAMK1D	CaMK I	Calcium Signaling	35
rs4132049	chr10	12837860	CAMK1D	CaMK I	Calcium Signaling	35
rs4078402	chr10	12838603	CAMK1D	CaMK I	Calcium Signaling	35
rs4453115	chr10	12838960	CAMK1D	CaMK I	Calcium Signaling	35
rs10752275	chr10	12840721	CAMK1D	CaMK I	Calcium Signaling	35
rs2989500	chr10	12841507	CAMK1D	CaMK I	Calcium Signaling	35
rs11257974	chr10	12844670	CAMK1D	CaMK I	Calcium Signaling	35
rs3802571	chr10	12845403	CAMK1D	CaMK I	Calcium Signaling	35
rs10906219	chr10	12845989	CAMK1D	CaMK I	Calcium Signaling	35
rs7910587	chr10	12849657	CAMK1D	CaMK I	Calcium Signaling	35
rs3781076	chr10	12854906	CAMK1D	CaMK I	Calcium Signaling	35
rs2493775	chr10	12854934	CAMK1D	CaMK I	Calcium Signaling	35
rs3781071	chr10	12864649	CAMK1D	CaMK I	Calcium Signaling	35
rs17497819	chr10	12866948	CAMK1D	CaMK I	Calcium Signaling	35
rs3802558	chr10	12867696	CAMK1D	CaMK I	Calcium Signaling	35
rs3781068	chr10	12867909	CAMK1D	CaMK I	Calcium Signaling	35
rs12359004	chr10	12870975	CAMK1D	CaMK I	Calcium Signaling	35
rs12257319	chr10	12871108	CAMK1D	CaMK I	Calcium Signaling	35
rs12767282	chr10	12871675	CAMK1D	CaMK I	Calcium Signaling	35
rs11257995	chr10	12874004	CAMK1D	CaMK I	Calcium Signaling	35
rs928337	chr10	12875051	CAMK1D	CaMK I	Calcium Signaling	35
rs2482038	chr10	12875091	CAMK1D	CaMK I	Calcium Signaling	35
rs2493767	chr10	12875389	CAMK1D	CaMK I	Calcium Signaling	35
rs2493765	chr10	12882926	CAMK1D	CaMK I	Calcium Signaling	35
rs11595099	chr10	12883752	CAMK1D	CaMK I	Calcium Signaling	35
rs17136885	chr10	12888039	CAMK1D	CaMK I	Calcium Signaling	35
rs4748000	chr10	12888863	CAMK1D	CaMK I	Calcium Signaling	35
rs1999369	chr10	12890242	CAMK1D	CaMK I	Calcium Signaling	35
rs10906229	chr10	12890474	CAMK1D	CaMK I	Calcium Signaling	35
rs2431629	chr10	12899074	CAMK1D	CaMK I	Calcium Signaling	35
rs17152297	chr10	12900018	CAMK1D	CaMK I	Calcium Signaling	35
rs2431628	chr10	12900397	CAMK1D	CaMK I	Calcium Signaling	35
rs2161365	chr10	12900753	CAMK1D	CaMK I	Calcium Signaling	35
rs766947	chr10	12900834	CAMK1D	CaMK I	Calcium Signaling	35
rs1630635	chr10	12901951	CAMK1D	CaMK I	Calcium Signaling	35
rs11812477	chr10	12902634	CAMK1D	CaMK I	Calcium Signaling	35
rs1644422	chr10	12902712	CAMK1D	CaMK I	Calcium Signaling	35
rs1757052	chr10	12904400	CAMK1D	CaMK I	Calcium Signaling	35
rs2482023	chr10	12906362	CAMK1D	CaMK I	Calcium Signaling	35
rs1644391	chr10	12908310	CAMK1D	CaMK I	Calcium Signaling	35
rs2482021	chr10	12909093	CAMK1D	CaMK I	Calcium Signaling	35
rs2431626	chr10	12910340	CAMK1D	CaMK I	Calcium Signaling	35
rs1644394	chr10	12911173	CAMK1D	CaMK I	Calcium Signaling	35
rs745259	chr10	12912566	CAMK1D	CaMK I	Calcium Signaling	35
rs2431623	chr10	12912886	CAMK1D	CaMK I	Calcium Signaling	35
rs1757063	chr10	12913358	CAMK1D	CaMK I	Calcium Signaling	35
rs1644395	chr10	12913469	CAMK1D	CaMK I	Calcium Signaling	35
rs16931456	chr10	30759470	MAP3K8	Cot	PI3K/AKT Signaling	35
rs8177049	chr10	30763907	MAP3K8	Cot	PI3K/AKT Signaling	35
rs1042058	chr10	30768107	MAP3K8	Cot	PI3K/AKT Signaling	35
rs303444	chr10	30769353	MAP3K8	Cot	PI3K/AKT Signaling	35
rs3824589	chr10	30771177	MAP3K8	Cot	PI3K/AKT Signaling	35
rs598009	chr10	30774889	MAP3K8	Cot	PI3K/AKT Signaling	35
rs1751648	chr10	30775615	MAP3K8	Cot	PI3K/AKT Signaling	35
rs650788	chr10	30784089	MAP3K8	Cot	PI3K/AKT Signaling	35
rs602097	chr10	30787552	MAP3K8	Cot	PI3K/AKT Signaling	35
rs8177029	chr10	30788504	MAP3K8	Cot	PI3K/AKT Signaling	35
rs9299657	chr10	31674719	TCF8	Transcription factor 8	Lymphocyte signaling	35
rs2839657	chr10	31695774	TCF8	Transcription factor 8	Lymphocyte signaling	35
rs17295696	chr10	31750560	TCF8	Transcription factor 8	Lymphocyte signaling	35
rs161258	chr10	31750637	TCF8	Transcription factor 8	Lymphocyte signaling	35
rs223531	chr10	31780097	TCF8	Transcription factor 8	Lymphocyte signaling	35
rs12217563	chr10	31781279	TCF8	Transcription factor 8	Lymphocyte signaling	35
rs220037	chr10	31804307	TCF8	Transcription factor 8	Lymphocyte signaling	35
rs696206	chr10	31816528	TCF8	Transcription factor 8	Lymphocyte signaling	35
rs2839664	chr10	31831507	TCF8	Transcription factor 8	Lymphocyte signaling	35
rs2839666	chr10	31842788	TCF8	Transcription factor 8	Lymphocyte signaling	35
rs172683	chr10	31846015	TCF8	Transcription factor 8	Lymphocyte signaling	35
rs2504016	chr10	33228440	ITGB1	CD29, fibronectin receptor	Leukocyte Extravasation	35
rs2153875	chr10	33230573	ITGB1	CD29, fibronectin receptor	Leukocyte Extravasation	35
rs2503995	chr10	33253477	ITGB1	CD29, fibronectin receptor	Leukocyte Extravasation	35
rs7079624	chr10	33257116	ITGB1	CD29, fibronectin receptor	Leukocyte Extravasation	35
rs2503998	chr10	33257424	ITGB1	CD29, fibronectin receptor	Leukocyte Extravasation	35
rs12412565	chr10	33261728	ITGB1	CD29, fibronectin receptor	Leukocyte Extravasation	35
rs2488331	chr10	33263770	ITGB1	CD29, fibronectin receptor	Leukocyte Extravasation	35
rs10827163	chr10	33266558	ITGB1	CD29, fibronectin receptor	Leukocyte Extravasation	35
rs10827164	chr10	33272634	ITGB1	CD29, fibronectin receptor	Leukocyte Extravasation	35
rs2488335	chr10	33272962	ITGB1	CD29, fibronectin receptor	Leukocyte Extravasation	35
rs11009156	chr10	33278849	ITGB1	CD29, fibronectin receptor	Leukocyte Extravasation	35
rs1187069	chr10	33279014	ITGB1	CD29, fibronectin receptor	Leukocyte Extravasation	35
rs1187070	chr10	33281144	ITGB1	CD29, fibronectin receptor	Leukocyte Extravasation	35
rs11009157	chr10	33282407	ITGB1	CD29, fibronectin receptor	Leukocyte Extravasation	35
rs1935647	chr10	33282869	ITGB1	CD29, fibronectin receptor	Leukocyte Extravasation	35
rs2475197	chr10	33283238	ITGB1	CD29, fibronectin receptor	Leukocyte Extravasation	35
rs1187078	chr10	33289139	ITGB1	CD29, fibronectin receptor	Leukocyte Extravasation	35
rs11592925	chr10	35465556	CREM	CREM	G-Protein Coupled Receptor Signaling	35
rs16935888	chr10	35472411	CREM	CREM	G-Protein Coupled Receptor Signaling	35
rs1148247	chr10	35536952	CREM	CREM	G-Protein Coupled Receptor Signaling	35
rs11010125	chr10	35542959	CREM	CREM	G-Protein Coupled Receptor Signaling	35
rs266094	chr10	44184306	CXCL12	CXCL12	Chemokines	35
rs266093	chr10	44186214	CXCL12	CXCL12	Chemokines	35
rs1029153	chr10	44187152	CXCL12	CXCL12	Chemokines	35
rs2522	chr10	44187310	CXCL12	CXCL12	Chemokines	35
rs3740085	chr10	44187775	CXCL12	CXCL12	Chemokines	35
rs1801157	chr10	44188263	CXCL12	CXCL12	Chemokines	35
rs266088	chr10	44190021	CXCL12	CXCL12	Chemokines	35
rs266087	chr10	44191068	CXCL12	CXCL12	Chemokines	35
rs2236534	chr10	44194315	CXCL12	CXCL12	Chemokines	35
rs11592974	chr10	44197507	CXCL12	CXCL12	Chemokines	35
rs3780891	chr10	44198719	CXCL12	CXCL12	Chemokines	35
rs1413519	chr10	44202567	CXCL12	CXCL12	Chemokines	35
rs3824612	chr10	45192870	ALOX5	ALOX5	Eicosanoid Signaling	35
rs12774369	chr10	45196922	ALOX5	ALOX5	Eicosanoid Signaling	35
rs17444064	chr10	45211706	ALOX5	ALOX5	Eicosanoid Signaling	35
rs934187	chr10	45216213	ALOX5	ALOX5	Eicosanoid Signaling	35
rs7099684	chr10	45217161	ALOX5	ALOX5	Eicosanoid Signaling	35
rs2115819	chr10	45221095	ALOX5	ALOX5	Eicosanoid Signaling	35
rs11239516	chr10	45222543	ALOX5	ALOX5	Eicosanoid Signaling	35
rs10900213	chr10	45224720	ALOX5	ALOX5	Eicosanoid Signaling	35
rs4948672	chr10	45234533	ALOX5	ALOX5	Eicosanoid Signaling	35
rs6593485	chr10	45236840	ALOX5	ALOX5	Eicosanoid Signaling	35
rs11239526	chr10	45238386	ALOX5	ALOX5	Eicosanoid Signaling	35
rs2279435	chr10	45243534	ALOX5	ALOX5	Eicosanoid Signaling	35
rs3740107	chr10	45243776	ALOX5	ALOX5	Eicosanoid Signaling	35
rs1565097	chr10	45244262	ALOX5	ALOX5	Eicosanoid Signaling	35
rs1487562	chr10	45248828	ALOX5	ALOX5	Eicosanoid Signaling	35
rs7080474	chr10	45251905	ALOX5	ALOX5	Eicosanoid Signaling	35
rs702366	chr10	45254378	ALOX5	ALOX5	Eicosanoid Signaling	35
rs10751382	chr10	45256365	ALOX5	ALOX5	Eicosanoid Signaling	35
rs2440861	chr10	49275145	MAPK8	JNK1	p38 MAPK Signaling	35
rs11101312	chr10	49277756	MAPK8	JNK1	p38 MAPK Signaling	35
rs7075976	chr10	49284283	MAPK8	JNK1	p38 MAPK Signaling	35
rs10857565	chr10	49289799	MAPK8	JNK1	p38 MAPK Signaling	35
rs11101318	chr10	49295589	MAPK8	JNK1	p38 MAPK Signaling	35
rs2289805	chr10	49297918	MAPK8	JNK1	p38 MAPK Signaling	35
rs17698086	chr10	49301570	MAPK8	JNK1	p38 MAPK Signaling	35
rs1062225	chr10	49313232	MAPK8	JNK1	p38 MAPK Signaling	35
rs2083771	chr10	54195684	MBL2	MBL	Complement Cascase	35
rs10824792	chr10	54196212	MBL2	MBL	Complement Cascase	35
rs11595876	chr10	54196768	MBL2	MBL	Complement Cascase	35
rs1838065	chr10	54199263	MBL2	MBL	Complement Cascase	35
rs4935047	chr10	54200073	MBL2	MBL	Complement Cascase	35
rs10824794	chr10	54203195	MBL2	MBL	Complement Cascase	35
rs1031101	chr10	54203366	MBL2	MBL	Complement Cascase	35
rs17664818	chr10	54204706	MBL2	MBL	Complement Cascase	35
rs2384046	chr10	54205846	MBL2	MBL	Complement Cascase	35
rs2127355	chr10	62204222	CDC2	Cdc2	Apoptosis Signaling	35
rs3213025	chr10	62209197	CDC2	Cdc2	Apoptosis Signaling	35
rs2448343	chr10	62209650	CDC2	Cdc2	Apoptosis Signaling	35
rs2260179	chr10	62209794	CDC2	Cdc2	Apoptosis Signaling	35
rs2448347	chr10	62215148	CDC2	Cdc2	Apoptosis Signaling	35
rs2456774	chr10	62216320	CDC2	Cdc2	Apoptosis Signaling	35
rs3213075	chr10	62221282	CDC2	Cdc2	Apoptosis Signaling	35
rs3213077	chr10	62222738	CDC2	Cdc2	Apoptosis Signaling	35
rs10711	chr10	62224480	CDC2	Cdc2	Apoptosis Signaling	35
rs1060373	chr10	62224506	CDC2	Cdc2	Apoptosis Signaling	35
rs17527619	chr10	72025812	PRF1	Perforin	Cytotoxic granules	35
rs12773662	chr10	72026203	PRF1	Perforin	Cytotoxic granules	35
rs7080373	chr10	72026772	PRF1	Perforin	Cytotoxic granules	35
rs885822	chr10	72028583	PRF1	Perforin	Cytotoxic granules	35
rs885821	chr10	72028661	PRF1	Perforin	Cytotoxic granules	35
rs10999426	chr10	72030044	PRF1	Perforin	Cytotoxic granules	35
rs12412124	chr10	72035136	PRF1	Perforin	Cytotoxic granules	35
rs12644	chr10	74867057	PPP3CB	Calcineurin	Calcium Signaling	35
rs12775630	chr10	74873337	PPP3CB	Calcineurin	Calcium Signaling	35
rs1041532	chr10	74877493	PPP3CB	Calcineurin	Calcium Signaling	35
rs3793663	chr10	74930189	PPP3CB	Calcineurin	Calcium Signaling	35
rs7923778	chr10	75428696	VCL	vinculin	Leukocyte Extravasation	35
rs12250729	chr10	75431866	VCL	vinculin	Leukocyte Extravasation	35
rs1403629	chr10	75443368	VCL	vinculin	Leukocyte Extravasation	35
rs10458640	chr10	75450844	VCL	vinculin	Leukocyte Extravasation	35
rs11000851	chr10	75451966	VCL	vinculin	Leukocyte Extravasation	35
rs7075862	chr10	75453139	VCL	vinculin	Leukocyte Extravasation	35
rs11000852	chr10	75453346	VCL	vinculin	Leukocyte Extravasation	35
rs3829127	chr10	75477371	VCL	vinculin	Leukocyte Extravasation	35
rs10762575	chr10	75481249	VCL	vinculin	Leukocyte Extravasation	35
rs11596526	chr10	75517810	VCL	vinculin	Leukocyte Extravasation	35
rs17743339	chr10	75530104	VCL	vinculin	Leukocyte Extravasation	35
rs10824071	chr10	75543645	VCL	vinculin	Leukocyte Extravasation	35
rs10824075	chr10	75550260	VCL	vinculin	Leukocyte Extravasation	35
rs7095804	chr10	88511951	BMPR1A	Growth factor receptor	NF-&kappa;B Signaling	35
rs6586035	chr10	88514428	BMPR1A	Growth factor receptor	NF-&kappa;B Signaling	35
rs4934263	chr10	88548203	BMPR1A	Growth factor receptor	NF-&kappa;B Signaling	35
rs4933413	chr10	88561234	BMPR1A	Growth factor receptor	NF-&kappa;B Signaling	35
rs12415784	chr10	88562707	BMPR1A	Growth factor receptor	NF-&kappa;B Signaling	35
rs7098516	chr10	88570230	BMPR1A	Growth factor receptor	NF-&kappa;B Signaling	35
rs7895217	chr10	88578719	BMPR1A	Growth factor receptor	NF-&kappa;B Signaling	35
rs4933416	chr10	88585327	BMPR1A	Growth factor receptor	NF-&kappa;B Signaling	35
rs11202222	chr10	88592466	BMPR1A	Growth factor receptor	NF-&kappa;B Signaling	35
rs2883420	chr10	88601102	BMPR1A	Growth factor receptor	NF-&kappa;B Signaling	35
rs10788528	chr10	88606751	BMPR1A	Growth factor receptor	NF-&kappa;B Signaling	35
rs11202230	chr10	88608948	BMPR1A	Growth factor receptor	NF-&kappa;B Signaling	35
rs10749542	chr10	88621608	BMPR1A	Growth factor receptor	NF-&kappa;B Signaling	35
rs11597689	chr10	88639156	BMPR1A	Growth factor receptor	NF-&kappa;B Signaling	35
rs12765929	chr10	88672535	BMPR1A	Growth factor receptor	NF-&kappa;B Signaling	35
rs1234220	chr10	89635453	PTEN	PTEN	PI3K/AKT Signaling	35
rs11202596	chr10	89637134	PTEN	PTEN	PI3K/AKT Signaling	35
rs1234219	chr10	89639557	PTEN	PTEN	PI3K/AKT Signaling	35
rs1234225	chr10	89663549	PTEN	PTEN	PI3K/AKT Signaling	35
rs17106896	chr10	89667087	PTEN	PTEN	PI3K/AKT Signaling	35
rs2673832	chr10	89702453	PTEN	PTEN	PI3K/AKT Signaling	35
rs17431184	chr10	89710231	PTEN	PTEN	PI3K/AKT Signaling	35
rs926091	chr10	89711392	PTEN	PTEN	PI3K/AKT Signaling	35
rs11202607	chr10	89717394	PTEN	PTEN	PI3K/AKT Signaling	35
rs983751	chr10	90736673	FAS	Fas	Death Receptor Signaling	35
rs3758483	chr10	90738716	FAS	Fas	Death Receptor Signaling	35
rs10509561	chr10	90741892	FAS	Fas	Death Receptor Signaling	35
rs10887877	chr10	90743018	FAS	Fas	Death Receptor Signaling	35
rs2031610	chr10	90744467	FAS	Fas	Death Receptor Signaling	35
rs1159120	chr10	90749672	FAS	Fas	Death Receptor Signaling	35
rs4406737	chr10	90749704	FAS	Fas	Death Receptor Signaling	35
rs9658741	chr10	90754719	FAS	Fas	Death Receptor Signaling	35
rs9658761	chr10	90759866	FAS	Fas	Death Receptor Signaling	35
rs982764	chr10	90759978	FAS	Fas	Death Receptor Signaling	35
rs2234978	chr10	90761809	FAS	Fas	Death Receptor Signaling	35
rs3218611	chr10	90764093	FAS	Fas	Death Receptor Signaling	35
rs1051070	chr10	90764752	FAS	Fas	Death Receptor Signaling	35
rs9658788	chr10	90766466	FAS	Fas	Death Receptor Signaling	35
rs10491070	chr10	97943276	BLNK	BLNK	Lymphocyte signaling	35
rs11188660	chr10	97947314	BLNK	BLNK	Lymphocyte signaling	35
rs2861304	chr10	97947875	BLNK	BLNK	Lymphocyte signaling	35
rs17232045	chr10	97950059	BLNK	BLNK	Lymphocyte signaling	35
rs7075831	chr10	97950945	BLNK	BLNK	Lymphocyte signaling	35
rs10882743	chr10	97951738	BLNK	BLNK	Lymphocyte signaling	35
rs12779295	chr10	97951801	BLNK	BLNK	Lymphocyte signaling	35
rs11188664	chr10	97952507	BLNK	BLNK	Lymphocyte signaling	35
rs7088458	chr10	97953169	BLNK	BLNK	Lymphocyte signaling	35
rs12772113	chr10	97958138	BLNK	BLNK	Lymphocyte signaling	35
rs2290714	chr10	97959684	BLNK	BLNK	Lymphocyte signaling	35
rs7911684	chr10	97961918	BLNK	BLNK	Lymphocyte signaling	35
rs12761346	chr10	97965262	BLNK	BLNK	Lymphocyte signaling	35
rs17111461	chr10	97970638	BLNK	BLNK	Lymphocyte signaling	35
rs10882745	chr10	97971150	BLNK	BLNK	Lymphocyte signaling	35
rs10491067	chr10	97972230	BLNK	BLNK	Lymphocyte signaling	35
rs4917723	chr10	97972565	BLNK	BLNK	Lymphocyte signaling	35
rs11188669	chr10	97977085	BLNK	BLNK	Lymphocyte signaling	35
rs12357751	chr10	97978443	BLNK	BLNK	Lymphocyte signaling	35
rs11591959	chr10	97978644	BLNK	BLNK	Lymphocyte signaling	35
rs10786271	chr10	97979029	BLNK	BLNK	Lymphocyte signaling	35
rs727852	chr10	97980573	BLNK	BLNK	Lymphocyte signaling	35
rs1574394	chr10	97981551	BLNK	BLNK	Lymphocyte signaling	35
rs10882755	chr10	97984005	BLNK	BLNK	Lymphocyte signaling	35
rs6584057	chr10	97986629	BLNK	BLNK	Lymphocyte signaling	35
rs11597989	chr10	97986820	BLNK	BLNK	Lymphocyte signaling	35
rs12765160	chr10	97987164	BLNK	BLNK	Lymphocyte signaling	35
rs12765376	chr10	97987224	BLNK	BLNK	Lymphocyte signaling	35
rs10882757	chr10	97988199	BLNK	BLNK	Lymphocyte signaling	35
rs4917728	chr10	97989547	BLNK	BLNK	Lymphocyte signaling	35
rs10882759	chr10	97990850	BLNK	BLNK	Lymphocyte signaling	35
rs3789927	chr10	97992856	BLNK	BLNK	Lymphocyte signaling	35
rs10786273	chr10	97999322	BLNK	BLNK	Lymphocyte signaling	35
rs3789930	chr10	98001354	BLNK	BLNK	Lymphocyte signaling	35
rs10882763	chr10	98005404	BLNK	BLNK	Lymphocyte signaling	35
rs3789934	chr10	98009896	BLNK	BLNK	Lymphocyte signaling	35
rs2861307	chr10	98010642	BLNK	BLNK	Lymphocyte signaling	35
rs4919039	chr10	98353234	PIK3AP1	PI3KAP1, BCAP	Lymphocyte signaling	35
rs7091606	chr10	98354973	PIK3AP1	PI3KAP1, BCAP	Lymphocyte signaling	35
rs11594403	chr10	98355902	PIK3AP1	PI3KAP1, BCAP	Lymphocyte signaling	35
rs10786304	chr10	98356575	PIK3AP1	PI3KAP1, BCAP	Lymphocyte signaling	35
rs7893530	chr10	98360510	PIK3AP1	PI3KAP1, BCAP	Lymphocyte signaling	35
rs4146727	chr10	98362094	PIK3AP1	PI3KAP1, BCAP	Lymphocyte signaling	35
rs11188856	chr10	98367930	PIK3AP1	PI3KAP1, BCAP	Lymphocyte signaling	35
rs12784975	chr10	98370127	PIK3AP1	PI3KAP1, BCAP	Lymphocyte signaling	35
rs3748234	chr10	98370267	PIK3AP1	PI3KAP1, BCAP	Lymphocyte signaling	35
rs10882829	chr10	98371635	PIK3AP1	PI3KAP1, BCAP	Lymphocyte signaling	35
rs7071006	chr10	98372155	PIK3AP1	PI3KAP1, BCAP	Lymphocyte signaling	35
rs9633706	chr10	98372293	PIK3AP1	PI3KAP1, BCAP	Lymphocyte signaling	35
rs7905024	chr10	98374137	PIK3AP1	PI3KAP1, BCAP	Lymphocyte signaling	35
rs10882835	chr10	98384649	PIK3AP1	PI3KAP1, BCAP	Lymphocyte signaling	35
rs2025452	chr10	98385073	PIK3AP1	PI3KAP1, BCAP	Lymphocyte signaling	35
rs12251867	chr10	98389721	PIK3AP1	PI3KAP1, BCAP	Lymphocyte signaling	35
rs11188870	chr10	98393536	PIK3AP1	PI3KAP1, BCAP	Lymphocyte signaling	35
rs11188871	chr10	98393883	PIK3AP1	PI3KAP1, BCAP	Lymphocyte signaling	35
rs12773084	chr10	98394921	PIK3AP1	PI3KAP1, BCAP	Lymphocyte signaling	35
rs912482	chr10	98397981	PIK3AP1	PI3KAP1, BCAP	Lymphocyte signaling	35
rs17484143	chr10	98398056	PIK3AP1	PI3KAP1, BCAP	Lymphocyte signaling	35
rs3827867	chr10	98406314	PIK3AP1	PI3KAP1, BCAP	Lymphocyte signaling	35
rs12243519	chr10	98407059	PIK3AP1	PI3KAP1, BCAP	Lymphocyte signaling	35
rs7098785	chr10	98407920	PIK3AP1	PI3KAP1, BCAP	Lymphocyte signaling	35
rs1023742	chr10	98413729	PIK3AP1	PI3KAP1, BCAP	Lymphocyte signaling	35
rs7083114	chr10	98417039	PIK3AP1	PI3KAP1, BCAP	Lymphocyte signaling	35
rs11188880	chr10	98418177	PIK3AP1	PI3KAP1, BCAP	Lymphocyte signaling	35
rs7920142	chr10	98419584	PIK3AP1	PI3KAP1, BCAP	Lymphocyte signaling	35
rs687528	chr10	98423595	PIK3AP1	PI3KAP1, BCAP	Lymphocyte signaling	35
rs610933	chr10	98425930	PIK3AP1	PI3KAP1, BCAP	Lymphocyte signaling	35
rs11595566	chr10	98426814	PIK3AP1	PI3KAP1, BCAP	Lymphocyte signaling	35
rs7070359	chr10	98432066	PIK3AP1	PI3KAP1, BCAP	Lymphocyte signaling	35
rs7895196	chr10	98438837	PIK3AP1	PI3KAP1, BCAP	Lymphocyte signaling	35
rs17484770	chr10	98447005	PIK3AP1	PI3KAP1, BCAP	Lymphocyte signaling	35
rs3748229	chr10	98459497	PIK3AP1	PI3KAP1, BCAP	Lymphocyte signaling	35
rs17112076	chr10	98459683	PIK3AP1	PI3KAP1, BCAP	Lymphocyte signaling	35
rs4917749	chr10	98467080	PIK3AP1	PI3KAP1, BCAP	Lymphocyte signaling	35
rs1172480	chr10	98467247	PIK3AP1	PI3KAP1, BCAP	Lymphocyte signaling	35
rs563654	chr10	98468439	PIK3AP1	PI3KAP1, BCAP	Lymphocyte signaling	35
rs1172479	chr10	98471297	PIK3AP1	PI3KAP1, BCAP	Lymphocyte signaling	35
rs595883	chr10	98473764	PIK3AP1	PI3KAP1, BCAP	Lymphocyte signaling	35
rs687562	chr10	98475095	PIK3AP1	PI3KAP1, BCAP	Lymphocyte signaling	35
rs12764732	chr10	101948760	CHUK	IKK&alpha;	NF-&kappa;B Signaling	35
rs7903344	chr10	101967873	CHUK	IKK&alpha;	NF-&kappa;B Signaling	35
rs11595324	chr10	101969408	CHUK	IKK&alpha;	NF-&kappa;B Signaling	35
rs12247992	chr10	101975077	CHUK	IKK&alpha;	NF-&kappa;B Signaling	35
rs10883617	chr10	103103025	BTRC	beta-TrCP	NF-&kappa;B Signaling	35
rs7091024	chr10	103114476	BTRC	beta-TrCP	NF-&kappa;B Signaling	35
rs7909404	chr10	103191253	BTRC	beta-TrCP	NF-&kappa;B Signaling	35
rs12765602	chr10	103197170	BTRC	beta-TrCP	NF-&kappa;B Signaling	35
rs11191017	chr10	103203554	BTRC	beta-TrCP	NF-&kappa;B Signaling	35
rs10883657	chr10	103203659	BTRC	beta-TrCP	NF-&kappa;B Signaling	35
rs11597599	chr10	103238567	BTRC	beta-TrCP	NF-&kappa;B Signaling	35
rs12774622	chr10	103262211	BTRC	beta-TrCP	NF-&kappa;B Signaling	35
rs9419922	chr10	103270303	BTRC	beta-TrCP	NF-&kappa;B Signaling	35
rs9419923	chr10	103271298	BTRC	beta-TrCP	NF-&kappa;B Signaling	35
rs11595968	chr10	103306641	BTRC	beta-TrCP	NF-&kappa;B Signaling	35
rs7897947	chr10	104147701	NFKB2	NF-kB 2	NF-&kappa;B Signaling	35
rs11574849	chr10	104149686	NFKB2	NF-kB 2	NF-&kappa;B Signaling	35
rs1056890	chr10	104152760	NFKB2	NF-kB 2	NF-&kappa;B Signaling	35
rs17128356	chr10	112822215	ADRA2A		G-Protein Coupled Receptor Signaling	35
rs12246561	chr10	112825099	ADRA2A		G-Protein Coupled Receptor Signaling	35
rs521674	chr10	112825580	ADRA2A		G-Protein Coupled Receptor Signaling	35
rs11195419	chr10	112829358	ADRA2A		G-Protein Coupled Receptor Signaling	35
rs3750625	chr10	112829591	ADRA2A		G-Protein Coupled Receptor Signaling	35
rs11196418	chr10	115428456	CASP7	Caspase 7	Apoptosis Signaling	35
rs7922608	chr10	115429909	CASP7	Caspase 7	Apoptosis Signaling	35
rs7907519	chr10	115431673	CASP7	Caspase 7	Apoptosis Signaling	35
rs11196422	chr10	115433080	CASP7	Caspase 7	Apoptosis Signaling	35
rs6421366	chr10	115440504	CASP7	Caspase 7	Apoptosis Signaling	35
rs12358524	chr10	115441771	CASP7	Caspase 7	Apoptosis Signaling	35
rs11593766	chr10	115447254	CASP7	Caspase 7	Apoptosis Signaling	35
rs3124741	chr10	115458798	CASP7	Caspase 7	Apoptosis Signaling	35
rs4457708	chr10	115459982	CASP7	Caspase 7	Apoptosis Signaling	35
rs12769172	chr10	115474173	CASP7	Caspase 7	Apoptosis Signaling	35
rs12416109	chr10	115474650	CASP7	Caspase 7	Apoptosis Signaling	35
rs10787498	chr10	115479640	CASP7	Caspase 7	Apoptosis Signaling	35
rs1127687	chr10	115480099	CASP7	Caspase 7	Apoptosis Signaling	35
rs4595501	chr10	115481555	CASP7	Caspase 7	Apoptosis Signaling	35
rs11101672	chr10	134970635	ADAM8	CD156a, ADAM8	Adhesion	35
rs1131718	chr10	134974635	ADAM8	CD156a, ADAM8	Adhesion	35
rs2275725	chr10	134977916	ADAM8	CD156a, ADAM8	Adhesion	35
rs1573041	chr10	134980683	ADAM8	CD156a, ADAM8	Adhesion	35
rs12778349	chr10	134982554	ADAM8	CD156a, ADAM8	Adhesion	35
rs11101677	chr10	134983806	ADAM8	CD156a, ADAM8	Adhesion	35
rs10794306	chr11	263808	NALP6	NALP6	CARD	35
rs7124394	chr11	264638	NALP6	NALP6	CARD	35
rs11246045	chr11	264780	NALP6	NALP6	CARD	35
rs11246048	chr11	268039	NALP6	NALP6	CARD	35
rs4758635	chr11	273928	NALP6	NALP6	CARD	35
rs9737419	chr11	276621	NALP6	NALP6	CARD	35
rs11246175	chr11	521652	HRAS	Ras	ERK/MAPK Signaling	35
rs4963176	chr11	528532	HRAS	Ras	ERK/MAPK Signaling	35
rs702966	chr11	601919	IRF7	IRF7	Interferon Signaling	35
rs3758650	chr11	606865	IRF7	IRF7	Interferon Signaling	35
rs2246614	chr11	609789	IRF7	IRF7	Interferon Signaling	35
rs7932167	chr11	610599	IRF7	IRF7	Interferon Signaling	35
rs5744030	chr11	1253327	TOLLIP	TOLLIP	Toll-like Receptor Signaling	35
rs3829223	chr11	1256982	TOLLIP	TOLLIP	Toll-like Receptor Signaling	35
rs3750920	chr11	1266532	TOLLIP	TOLLIP	Toll-like Receptor Signaling	35
rs11042484	chr11	1274888	TOLLIP	TOLLIP	Toll-like Receptor Signaling	35
rs5743899	chr11	1280140	TOLLIP	TOLLIP	Toll-like Receptor Signaling	35
rs5743867	chr11	1284927	TOLLIP	TOLLIP	Toll-like Receptor Signaling	35
rs3842748	chr11	2137971	INS	Insulin	NF-&kappa;B Signaling	35
rs2070762	chr11	2142911	INS	Insulin	NF-&kappa;B Signaling	35
[truncated: 10,013 more rows]
