# Supplementary material for: Assembly of Inflammation-Related Genes for Pathway-Focused Genetic Analysis
Source: PLoS One. 2007 Oct 17;2(10):e1035. doi: 10.1371/journal.pone.0001035 (PMC2001184; doi:10.1371/journal.pone.0001035)
Supplement: Table S6 — Summary for gene coverage of Wfinflam panels and other genome wide association panels (0.04 MB XLS) [file pone.0001035.s006.xls]

## Sheet: counts_master
Table S6. Summary for gene coverage of Wfinflam panels and other genome wide association panels
CEU			r-square
	Wfinflam		0	0.1	0.2	0.3	0.4	0.5	0.6	0.7	0.8	0.9	1
	% of SNPs over r-square threshold	>=50	1	0.999021	0.999021	0.998041	0.998041	0.996082	0.996082	0.995103	0.993144	0.989226	0.958864
		>=60	1	0.998041	0.996082	0.994123	0.993144	0.989226	0.989226	0.986288	0.985309	0.969638	0.89618
		>=70	1	0.996082	0.992165	0.988247	0.987267	0.984329	0.98335	0.978452	0.975514	0.950049	0.765916
		>=80	1	0.994123	0.991185	0.985309	0.98335	0.978452	0.975514	0.96474	0.957884	0.888345	0.593536
		>=90	1	0.991185	0.986288	0.970617	0.961802	0.955926	0.946131	0.925563	0.904016	0.725759	0.296768
		>=100	1	0.978452	0.953967	0.917728	0.882468	0.84427	0.805093	0.756121	0.691479	0.365328	0.170421
			r-square
	Illumina_550k		0	0.1	0.2	0.3	0.4	0.5	0.6	0.7	0.8	0.9	1
	% of SNPs over r-square threshold	>=50	1	1	0.999021	0.998041	0.998041	0.997062	0.996082	0.992165	0.986288	0.963761	0.901077
		>=60	1	1	0.998041	0.998041	0.994123	0.993144	0.989226	0.979432	0.962782	0.921645	0.807052
		>=70	1	1	0.998041	0.998041	0.992165	0.988247	0.976494	0.957884	0.93144	0.867777	0.676787
		>=80	1	1	0.998041	0.995103	0.987267	0.972576	0.956905	0.933399	0.891283	0.788443	0.483839
		>=90	1	0.999021	0.991185	0.973555	0.954946	0.929481	0.89716	0.856024	0.789422	0.589618	0.251714
		>=100	1	0.994123	0.940255	0.870715	0.796278	0.728697	0.658178	0.567091	0.4476	0.270323	0.130264
			r-square
	Affymetrix_500k		0	0.1	0.2	0.3	0.4	0.5	0.6	0.7	0.8	0.9	1
	% of SNPs over r-square threshold	>=50	1	0.999021	0.992165	0.981391	0.963761	0.952008	0.93046	0.902057	0.872674	0.796278	0.666993
		>=60	1	0.997062	0.986288	0.960823	0.94907	0.923604	0.89716	0.859941	0.815867	0.714985	0.542605
		>=70	1	0.997062	0.972576	0.936337	0.914789	0.883448	0.846229	0.800196	0.74143	0.611166	0.392752
		>=80	1	0.995103	0.961802	0.915769	0.883448	0.831538	0.794319	0.729677	0.63761	0.476004	0.248776
		>=90	1	0.988247	0.918707	0.860921	0.798237	0.738492	0.661117	0.563173	0.458374	0.284035	0.104799
		>=100	1	0.957884	0.772772	0.641528	0.529873	0.428991	0.357493	0.283056	0.20666	0.12047	0.0558276
JPT/CHB			r-square
	Wfinflam		0	0.1	0.2	0.3	0.4	0.5	0.6	0.7	0.8	0.9	1
	% of SNPs over r-square threshold	>=50	1	0.988142	0.98419	0.981225	0.978261	0.975296	0.962451	0.952569	0.939723	0.907115	0.777668
		>=60	1	0.982213	0.972332	0.965415	0.95751	0.947628	0.933794	0.914032	0.887352	0.831028	0.636364
		>=70	1	0.977273	0.964427	0.951581	0.933794	0.91996	0.896245	0.862648	0.816206	0.729249	0.453557
		>=80	1	0.970356	0.950593	0.924901	0.901186	0.875494	0.841897	0.793478	0.72332	0.598814	0.30336
		>=90	1	0.94664	0.897233	0.86166	0.826087	0.779644	0.719368	0.645257	0.535573	0.379447	0.148221
		>=100	1	0.874506	0.746047	0.643281	0.557312	0.490119	0.429842	0.36166	0.282609	0.195652	0.110672
			r-square
	Illumina_HumanHap550		0	0.1	0.2	0.3	0.4	0.5	0.6	0.7	0.8	0.9	1
	% of SNPs over r-square threshold	>=50	1	0.999012	0.997036	0.993083	0.988142	0.982213	0.980237	0.974308	0.958498	0.932806	0.799407
		>=60	1	0.999012	0.994071	0.985178	0.979249	0.970356	0.960474	0.938735	0.920949	0.869565	0.642292
		>=70	1	0.999012	0.994071	0.982213	0.970356	0.956522	0.935771	0.910079	0.87747	0.794466	0.454545
		>=80	1	0.997036	0.978261	0.962451	0.949605	0.933794	0.908103	0.873518	0.825099	0.684783	0.277668
		>=90	1	0.990119	0.955534	0.924901	0.895257	0.850791	0.815217	0.746047	0.648221	0.439723	0.132411
		>=100	1	0.963439	0.835968	0.728261	0.656126	0.589921	0.512846	0.428854	0.348814	0.211462	0.0741107
			r-square
	Affymetrix_500k		0	0.1	0.2	0.3	0.4	0.5	0.6	0.7	0.8	0.9	1
	% of SNPs over r-square threshold	>=50	1	0.990119	0.976285	0.960474	0.944664	0.923913	0.906126	0.87747	0.832016	0.753953	0.577075
		>=60	1	0.985178	0.962451	0.936759	0.914032	0.889328	0.857708	0.815217	0.756917	0.667984	0.442688
		>=70	1	0.981225	0.950593	0.916008	0.881423	0.855731	0.817194	0.755929	0.675889	0.561265	0.317194
		>=80	1	0.976285	0.922925	0.882411	0.83498	0.79249	0.745059	0.666008	0.583004	0.445652	0.203557
		>=90	1	0.953557	0.87253	0.811265	0.741107	0.676877	0.602767	0.513834	0.417984	0.281621	0.0958498
		>=100	1	0.898221	0.701581	0.591897	0.505929	0.417984	0.349802	0.279644	0.214427	0.137352	0.0563241
YRI			r-square
	Wfinflam-YRI		0	0.1	0.2	0.3	0.4	0.5	0.6	0.7	0.8	0.9	1
	% of SNPs over r-square threshold	>=50	1	0.99609	0.99609	0.99609	0.99609	0.99609	0.99609	0.994135	0.994135	0.99218	0.98436
		>=60	1	0.994135	0.994135	0.994135	0.994135	0.993157	0.993157	0.99218	0.99218	0.979472	0.954057
		>=70	1	0.993157	0.991202	0.990225	0.989247	0.98827	0.98436	0.983382	0.981427	0.958944	0.863148
		>=80	1	0.99218	0.986315	0.982405	0.978495	0.973607	0.969697	0.965787	0.957967	0.902248	0.645161
		>=90	1	0.981427	0.971652	0.958944	0.949169	0.936461	0.921799	0.906158	0.88172	0.679374	0.27957
		>=100	1	0.954057	0.895406	0.84262	0.779081	0.713587	0.656891	0.601173	0.541544	0.26002	0.15738
			r-square
	Illumina_HumanHap550		0	0.1	0.2	0.3	0.4	0.5	0.6	0.7	0.8	0.9	1
	% of SNPs over r-square threshold	>=50	1	1	0.99902	0.991176	0.972549	0.943137	0.907843	0.85098	0.777451	0.622549	0.426471
		>=60	1	1	0.997059	0.977451	0.944118	0.893137	0.816667	0.743137	0.640196	0.453922	0.231373
		>=70	1	1	0.995098	0.959804	0.903922	0.813725	0.718627	0.623529	0.481373	0.286275	0.129412
		>=80	1	1	0.985294	0.922549	0.828431	0.695098	0.585294	0.466667	0.326471	0.165686	0.0558824
		>=90	1	0.998039	0.955882	0.840196	0.677451	0.531373	0.409804	0.292157	0.17451	0.0696078	0.0215686
		>=100	1	0.993137	0.846078	0.629412	0.422549	0.288235	0.190196	0.128431	0.0705882	0.0352941	0.0147059
			r-square
	Affymetrix_500k		0	0.1	0.2	0.3	0.4	0.5	0.6	0.7	0.8	0.9	1
	% of SNPs over r-square threshold	>=50	1	1	0.977451	0.943137	0.912745	0.859804	0.794118	0.711765	0.628431	0.5	0.345098
		>=60	1	0.99902	0.964706	0.923529	0.860784	0.787255	0.687255	0.601961	0.505882	0.352941	0.213725
		>=70	1	0.997059	0.95	0.87549	0.795098	0.687255	0.601961	0.501961	0.371569	0.230392	0.123529
		>=80	1	0.993137	0.933333	0.82451	0.718627	0.569608	0.477451	0.355882	0.238235	0.140196	0.0539216
		>=90	1	0.985294	0.880392	0.709804	0.558824	0.413725	0.311765	0.202941	0.12451	0.0598039	0.022549
		>=100	1	0.962745	0.715686	0.481373	0.321569	0.207843	0.146078	0.0970588	0.0558824	0.0294118	0.0117647
			r-square
	Illumina_HumanHap650		0	0.1	0.2	0.3	0.4	0.5	0.6	0.7	0.8	0.9	1
	% of SNPs over r-square threshold	>=50	1	0.998045	0.998045	0.99218	0.982405	0.968719	0.952102	0.923754	0.87781	0.773216	0.587488
		>=60	1	0.998045	0.99609	0.98436	0.965787	0.940371	0.893451	0.83871	0.770283	0.613881	0.351906
		>=70	1	0.998045	0.995112	0.975562	0.942326	0.891496	0.820137	0.750733	0.639296	0.427175	0.193548
		>=80	1	0.997067	0.987292	0.954057	0.895406	0.800587	0.710655	0.619746	0.487781	0.259042	0.0840665
		>=90	1	0.994135	0.964809	0.888563	0.767351	0.656891	0.544477	0.420332	0.27175	0.103617	0.0312805
		>=100	1	0.983382	0.848485	0.678397	0.512219	0.363636	0.260997	0.183773	0.112414	0.0537634	0.0195503
			r-square
	Wfinflam		0	0.1	0.2	0.3	0.4	0.5	0.6	0.7	0.8	0.9	1
	% of SNPs over r-square threshold	>=50	1	0.968627	0.945098	0.919608	0.872549	0.823529	0.751961	0.676471	0.585294	0.455882	0.326471
		>=60	1	0.957843	0.916667	0.85098	0.801961	0.711765	0.606863	0.519608	0.406863	0.289216	0.194118
		>=70	1	0.939216	0.868627	0.776471	0.692157	0.583333	0.466667	0.364706	0.257843	0.163725	0.0960784
		>=80	1	0.904902	0.787255	0.671569	0.551961	0.414706	0.306863	0.216667	0.155882	0.0911765	0.0470588
		>=90	1	0.847059	0.663725	0.489216	0.344118	0.219608	0.154902	0.113725	0.0754902	0.0460784	0.0303922
		>=100	1	0.707843	0.406863	0.258824	0.178431	0.122549	0.0813725	0.0656863	0.0490196	0.0382353	0.0303922
